# Supplementary material for: 2017 Annual Report of the ABPN
Source: Atypon-hosted journal article supplement (doi:10.1176/appi.ajp.2017.1750804), 2018-08-01
Supplement: appi.ajp.2017.1750804.ds001.pdf [file appi.ajp.2017.1750804.ds001.pdf]

## AP MOC

Muhammad Baber, M.D., Saint Louis, MO  
Alan Samuel Berns, M.D., Lake Mary, FL  
Farzana Mohsin Bharmal, M.D., Lilburn, GA  
Michael Parks Bogenschutz, M.D., New York, NY  
John Michael Bostwick, M.D., Rochester, MN  
Timothy Eugene Botello, M.D., M.P.H., Los Angeles, CA  
Mark Hall Broadhead, M.D., Reno, NV  
Richard Francisco Camino Gaztamgide, M.D., Augusta, GA  
Kathy Lee Coffman, M.D., Cleveland Heights, OH  
Jeffrey Arlen Danziger, M.D., Maitland, FL  
Shelley J. Doumani-Semino, M.D., Phoenix, AZ  
Hany Wadie Elia, M.D., Martinez, GA  
Mark S. Fettman, M.D., Portland, OR  
Thomas Michael Fitzgerald Jr., M.D., Davidson, NC  
John Adam Fromson, M.D., Waban, MA  
Ann Christine Genovese, M.D., Westwood, KS  
Sander G. Genser, M.D., Potomac, MD  
Lisa Michele Goldfarb, M.D., New York, NY  
Michael A. Gureasko, M.D., Cincinnati, OH  
Patricia Margaret Halligan, M.D., Pittsford, NY  
Elizabeth Connell Henderson, M.D., HICKORY, MS  
Everett H. Hill, M.D., Lebanon, NJ  
Amy S. Hoffman, M.D., New York, NY  
John Richard Hubbard, M.D., Ph.D., Tuscaloosa, AL  
Margaret A. Enochs Jarvis, M.D., Waverly, PA  
George E. Kalousek, M.D., Westminster, CO  
Matthew Scott Keene, M.D., Litchfield Pk, AZ  
Moiria J. Kennedy, M.D., New York, NY  
Harlan Kosson, M.D., Pittsford, NY

Lois Elaine Krahn, M.D., Scottsdale, AZ  
Donald Thomas Lewis, D.O., Minneapolis, MN  
Jill Lynette Liesveld, M.D., Coralville, IA  
Linda Low, D.O., Huntington, NY  
Anthony Thomas Machi, M.D., L.F.A.P.A., Fort Worth, TX  
Maureen Ann Malin, M.D., Ph.D., EdD MBA, Lincoln, MA  
Murthy V.S. Mangipudi, M.D., Corpus Christi, TX  
Joanne Moore, M.D., Little Neck, NY  
Kalpana Isabel Nathan, M.D., Mountain View, CA  
Adedapo Mofoluso Oduwole, M.D., Myrtle Beach, SC  
Michael Joshua Ostacher, M.D., Stanford, CA  
Kangeyan Pachaiyappan, M.D., Rancho Mission Viejo, CA  
Ismene Leonida Petrakis, M.D., West Haven, CT  
Cesar Pilar Rafano, M.D., Longview, WA  
Krishnaiah Rayasam, M.D., Crp Christi, TX  
Michael Mark Reese, M.D., Rochester, MN  
Alfred Jason Richter, M.D., Denver, CO  
Ihsan Moussa Salloum, M.D., MPH, Coral Gables, FL  
Ofra Sarid-Segal, M.D., Newton, MA  
Jane Eva Maria Sasaki, M.D., Atlantic Beach, FL  
Helen Lilli Schleimer, M.D., Douglaston, NY  
Jonathan Gershon Shack, M.D., Bala Cynwyd, PA  
Ashokkumar K. Shah, M.D., Kenosha, WI  
Geetha Anjali Subramaniam, M.D., Washington, DC  
Christian Conrad Thurstone, M.D., Denver, CO  
Louis Alphonse Trevisan, M.D., Milford, CT  
Michelle Lee Widlitz, M.D., New York, NY  
Lauren Dorothy Williams, M.D., Jacksonville, FL  
Thomas Craig Winegarden, M.D., Eden Prairie, MN  
Kenneth James Zemanek, M.D., Allentown, PA  
John Alexander Baker, M.D., Lansing, MI

Gregory Francis Karcnik, M.D., Princeton Junction, NJ  
Alexander Eduard Obolsky, M.D., Chicago, IL

### **CAP Cert**

Sean F. Ackerman, M.D., Madison, WI  
Cathleen Marie Adams, MD, Lewisburg, PA  
Michael Joseph Adelman, M.D., Chapel Hill, NC  
Isabella O Adjinah, D.O., Columbia, SC  
Vladislav Afanasevich, M.D., Sacramento, CA  
Mawuena M. Agbonyitor, M.D., Atlanta, GA  
Maria Elena Aguilo-Seara, D.O., Montgomery Village, MD  
Erum Pasha Ahmad, M.D., Westlake, OH  
Naser Ahmadi, M.D., Culver City, CA  
Nasreen Akbar, M.D., New York, NY  
Keerthi Akkineni, M.D., Berkeley, CA  
Zainab Al-Dhaher, M.D., Manteca, CA  
Mark David Alter, M.D., Ph.D., Ardmore, PA  
Naomi Ambalu, D.O., Morganville, NJ  
Ashleigh Brooke Anderson, D.O., Bethlehem, PA  
Benjamin James Anderson, M.D., West Hartford, CT  
Maria Aponte, M.D., Pittsburgh, PA  
Khalid Naveed Arshad, M.B.B.S., Chicago, IL  
Varsenik Arvanian, M.D., Halesite, NY  
Carolyn Auffmanberg, M.D., New York, NY  
Nicholas Austin, M.D., Portland, OR  
Jorge Avila, M.D., El Paso, TX  
Azeesat Babajide, M.D., Houston, TX  
Maria Andrea Baez, M.D., New York, NY  
Elizabeth Lynne Baker, MD, Mount Pleasant, SC  
Rekha Bandla, D.O., Chicago, IL

Alicia Ann Barnes, D.O., Saint Louis, MO  
Jocelyn Kelly Bayliss, M.D., Grovetown, GA  
Allison Winona Beckler, D.O., Gardner, MA  
Carina Elizabeth Behrens, M.D., Cincinnati, OH  
Xavier Belcher, M.D., Suffolk, VA  
Brian Steven Bello, M.D., Long Beach, CA  
Yusra Benhalim, M.D., San Antonio, TX  
Richard Alan Bennett, M.D., Cooperstown, NY  
Obianuju Jennifer Obi Berry, M.D., New York, NY  
Casey Berson, M.D., Cherry Hill, NJ  
Supriya Kumari Bhatia, M.D., Omaha, NE  
Vint Rolston Blackburn, M.D., Millvale, PA  
Michael H Bloch, M.D., M.S., Hamden, CT  
Avinash Boddapati, M.B.B.S., Staten Island, NY  
Elise Bonder, M.D., Shaker Hts, OH  
Karen Bos, M.D., San Francisco, CA  
Jeffrey Shane Bradley, M.D., Joplin, MO  
Elizabeth Hayden Brannan, M.D., Barrington, RI  
Andrew Bregman, M.D., Sacramento, CA  
Deborah M. Brooks, M.D., Baltimore, MD  
Caroline De Oleo Brozyna, M.D., Ellicott City, MD  
Nicholas James Bryant, M.D., Jersey Village, TX  
Theresa Bui, D.O., Pearland, TX  
Austin Lee Butterfield, M.D., Aurora, CO  
David Charmoy Buxton, M.D., Richmond, VA  
Stella Cai, M.D., Temple City, CA  
Claudia Campo-Soria, M.D., Minneapolis, MN  
Damira Caric-Sicenica, M.D., Ph.D., Pittsburgh, PA  
Robin Kimberly Caron, D.O., Concord, NH  
Amanda Cassel Castro, M.D., Wilmington, DE  
Marygrace Apellido Castro, M.D., Albuquerque, NM

Derick Juhying Chae, M.D., Mililani, HI

Shawn Chambers, M.D., Dallas, TX

Stephanie Hoi-Ling Chan, M.D., Torrance, CA

Raymond R Chankalal, M.D., Buffalo, NY

Janet Chen, MD, New York, NY

Jayleen Chen, M.D., Reno, NV

Jonathan Chernaik, M.D., Evanston, IL

Ram Chettiar, D.O., Overland Park, KS

Dorothy Chyung, M.D., Boston, MA

Valentina Cimolai, M.D., Richmond, VA

Courtney Cinko, MD, Cincinnati, OH

Adrienne Nicole Clark, M.D., Philadelphia, PA

Kimberly Clinebell, M.D., Mars, PA

Kerry D Conant, D.O., Lynn, MA

Mary Conlon, M.D., New York, NY

John Nathan Copeland, MD, Chapel Hill, NC

Aronica Cotton, M.D., Baltimore, MD

Lara Cox, M.D., New York, NY

Emily Cullen, M.D., Charleston, SC

John Peter Daly, M.D., San Jose, CA

Gloria Thamara Davis, M.D., Pawtucket, RI

Ryan Kory Davis, M.D., Los Angeles, CA

Anthony Joseph Deo, M.D., Cambridge, MA

Toral Nitinbhai Desai, M.D., Santa Cruz, CA

An Hong Dinh, D.O., Houston, TX

Teresa Marie Dolphin-Shaw, D.O., Waukegan, IA

Seth Michael Dorsky, M.D., Springfield, NJ

Vishal Kirtikant Doshi, M.D., Secaucus, NJ

Roger Henry Duda, M.D., Alexandria, VA

Ashley Elisabeth Dumas, M.D., Little Rock, AR

Kathleen Beach Jackson Dunlap, M.D., Biltmore Forest, NC

Travis P Dunn, M.D., Maple Grove, MN

Liisa Elina Durchman, M.D., Mukilteo, WA

Seth Eappen, M.D., Orland Park, IL

Nicholas Koeppen Eilbeck, M.D., Shaker Heights, OH

Jessica Eisenberg, M.D., New York, NY

Yosra El-Menshawi, D.O., Milpitas, CA

Paul Elizondo, M.D., San Francisco, CA

Roba Elkhail, M.D., Dearborn Hts., MI

Bryan Ellerson, M.D., Miami Beach, FL

Daniel Ojonugwa Emina, M.D., Walnut Creek, CA

Elizabeth Jane Erickson, D.O., Denver, CO

Pamelynn Ganal Esperanza, MD, New York, NY

Kenneth Kehinde Etefia, M.D., Oakland, CA

Elizabeth Falchook, M.D., Boca Raton, FL

Scott Benjamin Falkowitz, D.O., Plainview, NY

Genny I Feinberg, D.O., New York, NY

Myra Deanne Fernando, D.O., Monterey, CA

Patricia A. Fertig, D.O., Solana Beach, CA

Christopher Fischer, M.D., Sacramento, CA

Naomi Fishman, M.D., Portland, OR

Sarah Flanders, M.D., Eugene, OR

Aidith Flores-Carrera, D.O., FPO, AP

Heath Benton Foreman, D.O., Temple, TX

Iuliana Elena Frank, M.D., Baltimore, MD

Liberty J. Fritzler, M.D., Hudson, OH

Andi Fu, M.D., Philadelphia, PA

Meghan Elizabeth Gaare, M.D., Charlottesville, VA

Marta Galecki, M.D., New York, NY

Ashli M. Gamber, M.D., Hanover, MD

Hilary Gamble, M.D., Jamesville, NY

Jordan Scott Gardner, M.D., Golden, CO

Aditi Garg, M.B.B.S., Minneapolis, MN

Michael Brandon Garland, M.D., New Haven, CT

Rishi Gautam, M.B.B.S., Baltimore, MD

Justin Gerstner, M.D., Maplewood, MN

Roslyn Levine Gerwin, D.O., Portland, ME

Sogand Ghassemi, M.D., Minneapolis, MN

Elizabeth Hale Gillespie, D.O., Pittsburgh, PA

Carrie Gillett, M.D., Canton, MI

Artha Gillis, M.D., Los Angeles, CA

Nathaniel Daum Ginder, M.D., Los Angeles, CA

Allison L Giordano, M.D., Pittsford, NY

Shih Yee-Marie Tan Gipson, M.D., Boston, MA

Amelia Goodenough, M.D., New Orleans, LA

Heather Goodman, M.D., New York, NY

Cheryl Lea Green, M.D., Redlands, CA

Brian Lee Grimwood, D.O., Saint George, UT

Monica Grover, M.D., Houston, TX

Delisa Eva Guadarrama, M.D., Edinburg, TX

Tuhin Gupta, M.B.B.S., Pittsburgh, PA

Sarah Ellen Eberhardt Guth, M.D., Burlington, VT

Danielle Renee Hafner, MD, Redmond, OR

Jessica Halpern, M.D., Hoboken, NJ

Meredith Eileen Harewood, M.D., Los Angeles, CA

Charles Harris, M.D., Fayetteville, NY

Elana Harris, MD, Cincinnati, OH

Kristin Nicole Homburg Harris, M.D., Denver, CO

Aaron Julian Hauptman, M.D., New York, NY

Lauren Koehler Havel, M.D., New York, NY

Elizabeth Ann Hayford, M.D., North Canton, OH

Sarah Ingrid Savage Haynal, M.D., Maple Valley, WA

Joseph Malietoa Heath, M.D., Austin, TX

Nathan Herman, M.D., Norfolk, NE

Manuel Hernandez, M.D., Independence, MO

Stephanie Hernandez, D.O., Houston, TX

Gabriel Hernandez Beauchamp, M.D., GUAYNABO, PR

Douglas J Hess, D.O., Fargo, ND

Nicholas Heyne, M.D., Irving, TX

Wesley Joy Hill, M.D., Rome, GA

Dora Eva Hillman, D.O., Okemos, MI

Duong Vien Ho-Hoang, D.O., Irvine, CA

Sarah Caroline Homitsky, M.D., Gibsonia, PA

Hugh Howard Humphery, M.D., Palmetto Bay, FL

Scott Hunter, M.D., Santa Monica, CA

Nida Husain, D.O., Saginaw, MI

Geeta Sai Ilipilla, M.D., Dublin, OH

Gina Kim In, M.D., Pearland, TX

Atsuko Ishikawa, M.D., Minneapolis, MN

Natalie Jacobowski, M.D., Columbus, OH

Sree Latha Krishna Jadapalle, M.D., Apex, NC

Nicole Yvette Jaikaran, M.D., Dickinson, TX

Sonal Jandial, D.O., Pasadena, CA

Suni Niranjani, M.D., Columbia, MD

Agnieszka E Janicka, M.D., Providence, RI

Aaron Jeckell, M.D., Nashville, TN

Amber Lynn Johnson, M.D., Northfield, MN

Tiya Johnson, M.D., Louisville, KY

Taranjeet S Jolly, M.D., Clarksburg, MD

Justin Jones, M.D., Lewes, DE

Kshamta Joshi, M.D., Forest Hills, NY

Diana Lynn Kallis, M.D., Palm Springs, CA

Silpa Kamiseti, M.D., Rocky Hill, CT  
Ambika Kataria, M.D., Forest Hills, NY  
Balbinder Kaur, M.D., Potomac, MD  
Rajniderpal Kaur, M.D., Austin, TX  
Barbara Marie Kessel, D.O., Denver, CO  
Simreet Khaira, M.B.B.S., Boston, MA  
Aneela Khan, M.B.B.S., BrynMawr, PA  
Mili Manoj Khandheria, M.D., Dallas, TX  
Raunak Sunil Khisty, M.B.B.S., Chicago, IL  
Saniya Noor Kibria, M.D., Northport, NY  
Jung Won Kim, M.D., Birmingham, AL  
William Kim, M.D., Philadelphia, PA  
Deborah Anne Kissinger, D.O., Honolulu, HI  
Fiana Klein, D.O., Plainview, NY  
Scott Thomas Koski, M.D., Boulder, CO  
Nathaniel Alfredo Kouns, M.D., Grand Isle, VT  
Hal Kronsberg, M.D., Baltimore, MD  
Andrew Kuhle, D.O., Rockville, MD  
Vijeta Kushwaha, M.D., Pittsford, NY  
Joshua Lee LaGrant, D.O., Clarksville, TN  
Colin Barclay Lamb, M.D., Cape Elizabeth, ME  
Jason V Lambrese, M.D., Cleveland Heights, OH  
Jane Cyrena Lanier, M.D., Boston, MA  
Matthew Ford Larsen, D.O., Idaho Falls, ID  
Erica Larson, D.O., Marshfield, WI  
Nicholas Lawrence Lavin, M.D., Lafayette, LA  
Chuan Mei Lee, M.D., San Francisco, CA  
Jena Lee, M.D., Los Angeles, CA  
Lloyd Myung Lee, D.O., Venice, CA  
John Leikauf, M.D., Menlo Park, CA  
Ruby Lekwauwa, M.D., New Haven, CT

Sean Robert LeNoue, M.D., Denver, CO  
Jess D Levy, M.D., Cleveland, OH  
Morgan Birrell Liddell, M.D., Fairbanks, AK  
Wai Jenn Lim, M.D., Selangor, Malaysia  
Kenny Lin, M.D., Redwood City, CA  
John Dax Lindo, M.D., Riverside, CA  
Trixie Lipke, M.D., Highland Park, IL  
Virginia Paige Litz, D.O., Davidson, NC  
Mastan Reddy Lokireddy, M.B.B.S., Franklin Square, NY  
Erica G. LoRe, D.O., Whitestone, NY  
Ryan Michelle Lunsford, M.D., Honolulu, HI  
Lauren Lusk, M.D., Shreveport, LA  
Catherine Wickes MacColl, M.D., Vail, CO  
Ingrid Carolina Madero, M.D., Pittsford, NY  
Karimi Grace Mailutha, M.D., Maplewood, NJ  
Pradipta Majumder, M.D., Mechanicsburg, PA  
Andrea Parisa Mann, D.O., Chicago, IL  
Shiva Mansourkhani, M.D., El Paso, TX  
Nancy Rosemary Martinez Orellana, M.D., Los Angeles, CA  
Mirabelle Mattar, M.D., Providence, RI  
Molly Melissa McCarthy, D.O., Caledonia, MI  
Kelsey Leigh McClellan, M.D., Little Rock, AR  
Catherine Monica McCormick-Deaton, D.O., Maple Grove, MN  
John McCurdy, M.D., Louisville, KY  
Matthew D McEachern, M.D., Charlottesville, VA  
Moira Claire McKinnon Linam, M.D., Whitefish, MT  
Matthew Meek, M.D., Farmington, UT  
Askar Mehdi, M.B.B.S., Jamaica, NY  
Tanya Menard, M.D., Kennesaw, GA  
Akos Mersich, M.D., Denver, CO

Jamie L Migliori, M.D., Swanton, OH  
Jason Miiller, M.D., Iowa City, IA  
Brandon James Miller, M.D., Irving, TX  
Jason Minion, M.D., Morristown, NJ  
Garen Mirzaian, MD, Eugene, OR  
Shanti Renee Mitchell, M.D., Northville, MI  
GenaLynne Mooneyham, M.D., Durham, NC  
Wynne Shepard Morgan, M.D., Worcester, MA  
Ryan Moroze, M.D., Denver, CO  
Michael Dorian Morse, M.D., Washington, DC  
Heath Mueller, M.D., Claremore, OK  
Rebecca Muhle, M.D., Douglaston, NY  
Owen Muir, M.D., Brooklyn, NY  
James Andrew Murphy, M.D., Aurora, CO  
Lauren Murphy, D.O., Eden Prairie, MN  
Juliet Muzere, D.O., Elverson, PA  
Rachel Nadbrzuch, M.D., Rochester, NY  
Bernard Nanadiego, M.D., Chino Hills, CA  
M.M. Naveen, M.D., Charlotte, NC  
Mallery Neff, M.D., Indianapolis, IN  
Vedika Nehra, M.D., El Cerrito, CA  
Joshua Nelson, M.D., Rochester, NY  
Kierre Nelson, M.D., Washington DC, DC  
Michele Nelson, M.D., Huntington Beach, CA  
Chelsea Neumann, M.D., Fruit Heights, UT  
Jamie Zhi-Min Ng, M.D., SACRAMENTO, CA  
Lisa Nguyen, M.D., Honolulu, HI  
Thu-Ha Nguyen, M.D., Santa Monica, CA  
Jordan Lee Nordquist, M.D., Sioux Falls, SD  
Jennifer M O'Keeffe, M.D., Commack, NY  
Adesuwa Lenora Obasuyi, M.D., Baldwin, NY

Maria Luisa Obregon, M.D., San Antonio, TX  
Kelly Meredith Ochoa, M.D., Riverside, RI  
Aviva Olsavsky, M.D., Lakewood, CO  
David L Orme, M.D., Pleasant View, UT  
Louis Samuel Ostrowsky, M.D., Cambridge, MA  
Gbolahan Oyinloye, M.B.B.S., Green Bay, WI  
Eun Sun Paik, M.D., Morton Grove, IL  
Robert Timothy Paine, DO, Nottingham, MD  
James Palmer, D.O., Mapleton, UT  
Shashwat Pandhi, M.D., Philadelphia, PA  
Nitika Pant, M.D., Hinsdale, IL  
Aditi Parashar, M.B.B.S., El Centro, CA  
Iman Parhami, M.D., Tarzana, CA  
Rishi Mahesh Parikh, M.D., Rancho Cucamonga, CA  
Kinjal S Patel, D.O., Scottsdale, AZ  
Holly Peek, M.D., Boston, MA  
Piotr Pelc, D.O., Rancho Cucamonga, CA  
Brittany Ray Peters, M.D., Chapin, SC  
Justyna Piasecka, M.D., Providence, RI  
Subhash Pinnaka, M.B.B.S., Windber, PA  
Jessica Lauren Plauche, M.D., San Francisco, CA  
Stephanie Pope, MD, Mentor On The Lake, OH  
Sara Popkin, M.D., Hillsborough, NJ  
Emily Lizabeth Porch, M.D., Santa Rosa, CA  
Marina Post, M.D., Stanford, CA  
Roger George Pottanat, M.B.B.S., Boston, MA  
Laura Sanford Powers, M.D., New York, NY  
Zachariah David Prancun, D.O., Philadelphia, PA  
Natalie Ann Prohaska, M.D., Plymouth, MI  
Matthew David Jonathan Prok, M.D., Denver, CO  
Michael Blaise Przydzielski, M.D., Hanover, NH

Chad C Puffer, D.O., Byron, MN

Shujaat Qayyum, M.D., Tarrytown, NY

Yu Lily Quan, M.D., League City, TX

Jennifer Ann Quinn, M.D., Durham, NC

Natalia Ramos, M.D., West Hollywood, CA

Veronica M. Raney, M.D., Little Rock, AR

Nikhil Pillariseti Rao, M.D., Gainesville, FL

Carl Thomas Ratliff Jr., D.O., Indianapolis, IN

Abner Oliver Rayapati, M.D., Lexington, KY

Sheraz Riaz, M.B.B.S., Springfield, VA

Christopher Richards, M.D., Fort Lee, NJ

Misty Charissa Richards, MD, Los Angeles, CA

Barbara Franci Robles-Ramamurthy, M.D., Philadelphia, PA

Brittany Rodgers, M.D., Greer, SC

Cody Roi, D.O., New Orleans, LA

Heide Hullsiek Rollings, M.D., Grand Rapids, MI

Courtney Romba, M.D., Chicago, IL

Eric Soucy Rueff, D.O., Appleton, WI

Lisa Marie Ruiz, M.D., Bloomington, IN

Joshua Russell, M.D., East Amherst, NY

Kashmira Rustomji, M.D., brooklyn, NY

Leigh J. Ruth, M.D., Tampa, FL

Babar Majeed Saggi, M.B.B.S., Providence, RI

Lisa Sanchez, M.D., Louisville, KY

Gregory Robert Sayer, M.D., New York, NY

Alexandra Schick, M.D., Charleston, WV

Meghan Marie Schott, D.O., Denver, CO

Justin Warren Schreiber, D.O., Pittsburgh, PA

Shimon Schwartz, M.D., New York, NY

Jason Schweitzer, M.D., San Diego, CA

Claire Randall Selinger, M.D., Emerald Hills, CA

Karen Beth Seroussi, D.O., Austin, TX

Karthik Parasuraman Sethuram, D.O., Santa Clarita, CA

Cherie Sgambati, D.O., Nashville, TN

Kamleh Shaban, M.D., Louisville, KY

Sara Roya Shadaram, M.D., Scottsdale, AZ

Ajay Akshay Shah, M.D., Pearland, TX

Reena Shah, M.D., Kansas City, MO

Vishal Pankajkumar Shah, M.D., Keller, TX

Zarna Shah, D.O., Jersey City, NJ

Aditi Sharma, M.D., Seattle, WA

Rahul Sharma, M.D., Hoffman Estates, IL

Julia Shekunov, M.D., Rochester, MN

Nitasha Shetty, M.D., New York, NY

Anna Shier, D.O., Scottsdale, AZ

Hoonhee Shin, M.D., Flushing, NY

Himal P Shrestha, D.O., Lakewood, CO

Fatima Siddiqui, M.D., Montvale, NJ

Kathryn L Sigalow, M.D., Stamford, CT

Andrew Richard Silva, M.D., Ypsilanti, MI

Nicole M Silva, M.D., Fayetteville, NC

Alicia Silvestrini, M.D., Dallas, TX

Brian Michael Skehan, M.D., Ph.D., West Boylston, MA

Donnesha Slider, M.D., Pittsburgh, PA

Claire Lise Slocumb, M.D., Augusta, GA

Arneli Ascano Aguirre Solidum, M.D., Nevada, MO

Youeun Song, M.D., Pittsburgh, PA

Endra Sookoor, D.O., Apollo Beach, FL

Ilene Beth Spitzer, M.D., Portsmouth, NH

Meghan Noel Starner, M.D., Havertown, PA

Rachel State, M.D., Chapel Hill, NC

Jenna Steele, D.O., Waxhaw, NC  
Jessica Stern, M.D., Cambridge, MA  
Paul Taylor Stevens, M.D., Salt Lake City, UT  
Adriana Stewart, D.O., Jesup, GA  
Danijela Stojanac, M.D., Chicago, IL  
Thomas Alexander Suberman, M.D., Los Angeles, CA  
Archana Sugumar, M.B.B.S., Peoria, AZ  
Eliza Sukiennik, M.D., Western Springs, IL  
Steven Sust, M.D., Palo Alto, CA  
Rachel Joy Lim Sy-Layug, D.O., Mililani, HI  
Kara Sydelle Tabor-Furmark, M.D., Santa Monica, CA  
Kathreen Tadrous, M.D., Bayonne, NJ  
Jaspinder Tahim, D.O., M.P.H., Hanford, CA  
Christopher Robert Takala, D.O., Hartland, WI  
Yasas Chandra Tanguturi, M.B.B.S., Nashville, TN  
Michael Sterling Tanner, M.D., Las Vegas, NV  
Samir Tarpara, M.D., Arlington, VA  
Jerome Henry Taylor Jr, M.D., Philadelphia, PA  
Katherine Thomas, M.D., Reno, NV  
Anastasia Wermert Thompson, M.D., Riverside, RI  
Emily Ellen Tonkin, D.O., Minneapolis, MN  
Paula Tran, M.D., Stanford, CA  
Daniel J Tseng, M.D., Manhattan, KS  
Eric Yuanker Tung, D.O., San Diego, CA  
Catharyn A. Turner II, M.D., Philadelphia, PA  
Terra Natae Tyler, M.D., Frisco, TX  
Guillermo Valdes Montemayor, M.D., New York, NY  
Ashlee Breanna Hardesty Van Ginkel, M.D., Salt Lake City, UT  
Gerrit van Schalkwyk, M.D., Providence, RI  
Chinedu Onyedike Varma, M.D., Ellicott City, MD

Janani Venugopalakrishnan, M.B.B.S., Sunnyvale, CA  
Kelley Alma Volpe, M.D., Chicago, IL  
Christoph Valentin von Andrae, M.D., Wynnewood, PA  
Charles Jacob von Bose, D.O., Kaysville, UT  
Jonathan Vu, M.D., Madison, WI  
Richard K. Wagner, M.D., Milton, WI  
Natasha Wallace, M.D., Emeryville, CA  
Terese Zakiya Watkins-Laptiste, M.D., Rockville Centre, NY  
Alicia Watson, M.D., Beaufort, SC  
Jill Welte, M.D., Warwick, RI  
John Stuart Wermager, M.D., Apple Valley, MN  
Alexander Robin Nicholas Westphal, M.D., New Haven, CT  
Laura Wieczorek, D.O., Boston, MA  
Brian Alan Wilson, D.O., Hot Springs, SD  
Katie Elizabeth Wilson, M.D., Cottleville, MO  
Eric Nicholas Wittrock, D.O., Saint Louis, MO  
Michelle Wu, M.D., Los Angeles, CA  
Yang Xu, M.B.B.S., San Jose, CA  
Laura E. Yahr Nelson, M.D., Menomonee Falls, WI  
Esther Yang, M.D., Placentia, CA  
Brady Yates, D.O., Chevy Chase, MD  
Jun Yin, M.D., Houston, TX  
Jeein Yoon, M.D., Philadelphia, PA  
Yesie Yoon, M.D., Vestavia, AL  
Jillian Emiko Yoshimoto, D.O., Issaquah, WA  
Kristen Yost, D.O., Camp Hill, PA  
Alexander Kingston Yuen, M.D., Chicago, IL  
Muhammad Khalid Zafar, M.B.B.S., Midland, TX  
Karl Zate, M.D., Levittown, NY  
Jozef Zelenak, M.D., Raleigh, NC



Mini Zhang, M.D., Lake Oswego, OR

Eileen Ann Zhivago, M.D., Closter, NJ

Jonathan Gil Zilberstein, M.D., New York, NY

Jessica Erin Zoltani, M.D., Middletown, CT

Atika Zuberger, M.B.B.S., Dallas, PA

## **CAP MOC**

Lee Ian Ascherman, M.D., Mountain Brk, AL

Tami Dianne Benton, M.D., Cherry Hill, NJ

Brad Zale Berger, M.D., Pass Christian, MS

Syed Asad Hassan Bokhari, MBBS, Marriottsville, MD

James Kenneth Brown, M.D., Durham, NC

Marguerite Meriwether Brown, M.D., Decatur, AL

Christi Lee Cooper-Lehki, D.O., Morgantown, WV

Robyn Lyn Cowperthwaite, M.D., Edmond, OK

Thomas Kenneth Cummins, M.D., Evanston, IL

Denize Da Silva-Siegel, M.D., Rhinebeck, NY

Kevin Robert Dahmen, M.D., Bismarck, ND

Hanumantharao Damerla, M.D., Arcadia, CA

Amy Louise Donahue, M.D., Greenwood Village, CO

Daphne Dorc,, M.D., Wellington, FL

Joseph Gerald Dougherty, M.D., Silver Spring, MD

Sarah Ann Flynn, M.D., Sioux Falls, SD

Donald Ray Fulsom, M.D., Ph.D., Tyler, TX

John Gerald Gelinas Jr., M.D., Redding, CT

Maria Carmen V. Gonzales-Vigilar, M.D., Ashburn, VA

Lina Guertin, M.D., Larchmont, NY

McLeod Frampton Gwynette, M.D., Charleston, SC

Robert Gardell Hoehn, M.D., Memphis, TN

Afia Akhtar Hussain, M.D., Fairfax, VA

Shailesh Jain, M.D., Midland, TX

Hilary Manette Klein, M.D., Bridgeport, CT

Elisabeth Marijke Kressley, M.D., Essex, CT

Jennifer Liu, M.D., Montvale, NJ

Brent Roger Lovett, M.D., Naples, FL

Daniel Scott Mangold, M.D., Philadelphia, PA

Nan Elaine Nelson, M.D., Solon, OH

Karin Sandra Nylund, M.D., Portland, OR

Gina Rose Padula, M.D., Waxhaw, NC

Wynn Wynn Paing, M.D., Elkins Park, PA

Lidija Petrovic-Dovat, M.D., Hummelstown, PA

Kalpana Reddy Polu, M.D., Sharon, MA

Kirti Ramnivas, M.D., Schererville, IN

Amit Razdan, M.D., Tampa, FL

Valerie Thornton Relacion, M.D., Bethesda, MD

Derek Keith Richardson, M.D., Lilburn, GA

Moira Ann Rynn, M.D., New York, NY

James Giacomo Saccomando Jr., M.D., Boise, ID

John George Samanich, M.D., Pound Ridge, NY

Susan Sharp, D.O., Overland Park, KS

Amy Scamman Smith, M.D., Topeka, KS

Preeti Sodhi, M.D., Dallas, TX

Radosveta Ivanova Stoyanov, M.D., Alto, MI

Ian Robert Tofler, M.D., Los Angeles, CA

Barbara D. Twardowski, M.D., Glenview, IL

Agnieszka Anna Von Strandtmann, M.D., Prt Jeff Sta, NY

Sarah Rumpel Warren, M.D., Denver, CO

Joseph Alexander Whitfield, M.D., Monterey, CA

Cheryl Denise Wills, M.D., Cleveland, OH

Stelios Zodiatis, M.D., Saint James, NY

Jessica Anne Arsenault, M.D., Hampden, ME

Harmohinder Singh Athwal, M.D., Fremont, CA

Donna Lenore Beitel, M.D., Woolford, MD  
Carol Ahmann Beresford, M.D., Aurora, CO  
Richard Douglas Bingham, M.D., Salem, OR  
Vijayalaxmi Bogavelli, M.D., Portland, OR  
John Earl Bragg Jr., M.D., Lexington, SC  
Andrej Brajovic, M.D., Oakville, ON  
Jody Lane Brown, M.D., Gainesville, FL  
Rachel Margaret Ann Brown, M.B.B.S., Columbia, MO  
Karen Elaine Callahan, M.D., Birmingham, AL  
Louis Adolph Casal, M.D., Atlanta, GA  
Marie Daniella Charles, M.D., Rockville Centre, NY  
Anurita Chatterjee, M.D., Jericho, NY  
Anupama Chauhan, M.D., Maple Grove, MN  
Donna Shang Yen Ching, M.D., Hilo, HI  
Bowen Chung, M.D., Santa Monica, CA  
Elizabeth M. Cottingham, M.D., Cincinnati, OH  
Betsy Cregger, M.D., Menlo Park, CA  
Kim Duncan Dansie, M.D., High Point, NC  
Dean Michael De Crisce, M.D., Elizabeth, NJ  
Leslie S. W. Dixon, M.D., Alfred, ME  
Jana Kaye Dreyzehner, M.D., Nashville, TN  
Richard Gregg Dwyer, M.D., Charleston, SC  
Toral Madanmohan Fadia, M.D., Atlanta, GA  
Margaret Ruth Farrell, M.D., San Antonio, TX  
Anne Catherine Fedyszen, M.D., Midlothian, VA  
Ricardo Jose Fermo, M.D., Mount Pleasant, SC  
Sheila Marie Forsman-Bierman, M.D., Omaha, NE  
Peter Jones Geier, M.D., Beachwood, OH  
Lorenzo Gonzalez, M.D., San Juan, PR  
David Arthur Graeber, M.D., Scottsdale, AZ  
Latamia White Green, M.D., Lakeland, FL

David Michael Greer, M.D., Knoxville, TN  
Mary Celestine Hall-Mennes, M.D., Shaker Heights, OH  
Joan Plotkin Han, M.D., Chesterfield, VA  
Antonio Youssef Hardan, M.D., Stanford, CA  
Shirin Hasan, M.D., Lake Mary, FL  
Gary Gerhard Hellmann, M.D., Tucson, AZ  
Kevork Iskenderian, M.D., Pasadena, CA  
Sonya Nicole Jones, M.D., Collierville, TN  
Joshua Kahn, M.D., Northbrook, IL  
David George Kaiser, M.D., Columbus, GA  
Marcia Davenport Kent, M.D., East Lansing, MI  
Khalid Mohammad Khan, M.D., New York, NY  
Hilton Roy Lacy, M.D., Schuyler, VA  
Meg Depender Lawrence, M.D., San Diego, CA  
Wilbur George Lineback Jr., M.D., Midland, TX  
Cathy Jo Lore, M.D., Huntington, NY  
Joseph Paul Martin, D.O., San Antonio, TX  
Joseph Leon Martindale, D.O., Boulder, CO  
Courtenay Ruriko Matsu, M.D., Honolulu, HI  
Richard Mayer, M.D., Teaneck, NJ  
Michael McAndrew, M.D., Roseville, CA  
Jerlyn Cummings McCleod, M.D., Dothan, AL  
Eduardo Enrique Meza, M.D., Brookfield, WI  
Leslie Rachel Miller, M.D., Baltimore, MD  
Laura Eve Musikant-Weiser, M.D., Lexington, MA  
Elizabeth Marie Nagel, M.D., Copley, OH  
Nasima Nusrat, M.D., Bethesda, MD  
Jon Jason O'Pry, M.D., Aurora, CO  
Dale Aaron Peeples, M.D., Augusta, GA  
Marta Agnieszka Pieczalska, M.D., Naples, FL  
Daniel Samuel Pine, M.D., Bethesda, MD

Charles Zanwill Pryzant, M.D., Dallas, TX  
Edward Frederick Rabe, M.D., Ph.D., Cambridge, MA  
Najeeb Riaz, M.D., Plainsboro, NJ  
Laura Ann Ruoff, M.D., Bristol, RI  
Alina Segura-Bustamante, M.D., New York, NY  
Lori Kristin Harley Shadow, M.D., Kaysville, UT  
William Patrick Sheehan, M.D., Honolulu, HI  
Ronald Garvin St Hill, M.D., Quincy, IL  
Maya Patrice Strange, M.D., Essex, VT  
Gerald Wayne Travis, M.D., Asheville, NC  
Gina Genoveffa Vitiello, M.D., Randolph, MA  
Sonya Salih Wakil, M.D., Houston, TX  
Cindy Lou Wigg, M.D., Friendswood, TX  
Linda Kaye Young, M.D., Olympia, WA  
Patrick Gerard Young, M.D., Dallas, TX  
Jose Tomas Zaglul, M.D., Tampa, FL  
Kenneth James Zwier, M.D., Scottsdale, AZ

### **ChiN Cert**

Amal Abu Libdeh, M.B.B.S., Charlottesville, VA  
Christopher Allen, M.D., Saginaw, MI  
Bhooma Aravamuthan, M.D., Boston, MA  
Dallas Michael Mouroth Armstrong, M.D., Philadelphia, PA  
Monica Arroyo, M.D., Cincinnati, OH  
Jennifer Bain, M.D., Towaco, NJ  
Liliana Banari, M.D., Winston-Salem, NC  
Megan Barry, D.O., Denver, CO  
Luca Bartolini, M.D., Chevy Chase, MD  
Areeba Basit, M.B.B.S., Hollywood, FL  
Sarah Louise Bauer Huang, M.D., Saint Louis, MO

Giulia Benedetti, M.D., Chicago, IL  
Sonal Omprakash Bhatia, M.B.B.S., Charleston, SC  
Christopher Carosella, M.D., Cincinnati, OH  
Emma Grace Carter, M.D., Nashville, TN  
Diana Cejas, M.D., Rougemont, NC  
Hsiao-Tuan Chao, M.D., Bellaire, TX  
Jessica Chao, M.D., Brookline, MA  
Priscilla Hui-Min Chee, M.D., Loma Linda, CA  
Alison Christy, M.D., Portland, OR  
Samantha Wei-Lin Coffino, M.D., San Francisco, CA  
Sarah Elizabeth Conerly, M.D., Jackson, MS  
Elora Pattanaik Corbin, M.D., Fort Worth, TX  
Amanda Croxton, D.O., Saint Charles, IA  
Adam David, M.D., New York, NY  
Shannon Dean, M.D., Baltimore, MD  
Shalome Maria Dsouza, M.B.B.S., Decatur, GA  
Yaman Zorlu Eksioğlu, M.D., Ph.D., San Antonio, TX  
Ameze J. Ero, M.D., Jackson, MS  
Marytery Fajardo, M.D., Miami, FL  
Anthony Fine, M.D., Rochester, MN  
Keely Fitzgerald, D.O., Kansas City, MO  
Jordana Rachel Fox, D.O., Dallas, TX  
Katie Elizabeth Friederich, M.D., Fairfield, CA  
Jenna Marie Gaesser, M.D., Pittsburgh, PA  
Rose Gelineau-Morel, M.D., Kansas City, MO  
Marcie Goeden, M.D., Kansas City, MO  
Jacqueline Gofshteyn, M.D., Philadelphia, PA  
Grace Yoonheekim Gombolay, M.D., Cambridge, MA  
Jessica Nell Green, M.D., Indianapolis, IN  
Jennifer Lynn Griffith, M.D., St. Louis, MO  
Kevin Gurcharran, M.D., Kew Gardens, NY

Juliane Gust, M.D., Seattle, WA  
 Meagan Kristin Hainlen, M.D., Kansas City, MO  
 Joseph Paul Harmon, D.O., San Diego, CA  
 Meghan Regina Harper-Shankie, M.D., St Clair Shores, MI  
 Marie Bernadine Hidalgo Rivera, M.D., Aguada, PR  
 Megan Marie Holec, M.D., Coralville, IA  
 Rebecca Linda Holt, M.D., Boulder, CO  
 Andrew Wayne Hurd, M.D., Dallas, TX  
 Autumn Skye Ivy, M.D., Irvine, CA  
 Lauren Bader James, M.D., Westfield, IN  
 Anuja Vora Jindal, M.D., San Diego, CA  
 Puja Joshi, M.D., Fairfield, NJ  
 Trishna Kantamneni, M.B.B.S., Solon, OH  
 Kavitha Tirumalasetti Karnik, M.D., Houston, TX  
 Gurcharanjeet Kaur, M.B.B.S., New York, NY  
 Ilya Khaytin, M.D., Philadelphia, PA  
 Jenna Marie Klotz, M.D., Palo Alto, CA  
 Adam Kevin Kney, M.D., Pittsburgh, PA  
 Jeffrey Kornitzer, M.D., Passaic, NJ  
 Emily Langan, M.D., Williamsville, NY  
 Ryan Wai Yan Lee, M.D., Honolulu, HI  
 Nan Lin, M.D., Cincinnati, OH  
 Alexandria Lutley, M.D., Milwaukee, WI  
 Patrick Mabray, M.D., Ph.D., Boston, MA  
 Michael Marsh, M.D., San Antonio, TX  
 Juma Shee Mbwana, M.D., Olney, MD  
 James Miles, M.D., Grand Forks, ND  
 Albert Misko, M.D., Jamaica Plain, MA  
 Lileth Mondok, M.D., Milwaukee, WI  
 Amanda Beck Murphy, M.D., New York, NY  
 Divya Sunil Nadkarni, M.D., Los Angeles, CA  
 Margot Rose Nagan, M.D., Denver, CO  
 Audrey Nath, M.D., Houston, TX  
 Sarah Campbell Novara, M.D., Vestavia, AL  
 Jennifer Ann O'Malley, M.D., San Francisco, CA  
 Meghan O'Neill, M.D., Chicago, IL  
 Henry Osso-Rivera, M.D., Miami, FL  
 Amy Law Patterson, M.D., Memphis, TN  
 Nancy George Philip, M.D., Akron, OH  
 Pinar Polat, M.D., Denver, CO  
 Marisa Sara Prelack, M.D., Havertown, PA  
 Jyes Annemarie Querubin, M.D., Fontana, CA  
 Celine Robinson, D.O., Seal Beach, CA  
 Robert Rudock, M.D., Saint Louis, MO  
 dimah nayef saade, M.D., Rockville, MD  
 Sherry L Santiago Castro, M.D., Caguas, PR  
 Pascal Saremsky, M.D., Bethpage, NY  
 Aimee Sato, M.D., Washington, DC  
 Levi Shelton, M.D., Pittsburgh, PA  
 Evelyn Kim Shih, M.D., Cherry Hill, NJ  
 Inderpal Singh, M.B.B.S., Baldwinsville, NY  
 Garnett Carlisle Smith, M.D., Dexter, MI  
 Melissa Svoboda, MD, San Antonio, TX  
 Dmitry Tchapyjnikov, M.D., Durham, NC  
 Kinga Tomczak, M.D., Weston, MA  
 Melissa Tsuboyama, M.D., Boston, MA  
 Charles D Tyshkov, M.D., New York, NY  
 Keisuke Ueda, M.D., Chesterfield, MO  
 Sonam Verma, M.B.B.S., Houston, TX  
 Jennifer Anne Vermilion, M.D., Rochester, NY  
 Farah Jehan Villanueva, D.O., Torrance, CA

NgocHanh Vu, M.D., Nashville, TN  
Jennifer Waldron, D.O., Cuyahoga Falls, OH  
Cynthia Wang, M.D., Dallas, TX  
Ewa Way, M.D., Henrico, VA  
Lauren D'Angelo Weaver, M.D., New York, NY  
Carey Wilson, M.D., Salt Lake City, UT  
Kellen Winden, M.D., Boston, MA  
Melissa Adrienne Wright, M.D., Saint Peters, MO  
Yiting Yang, M.D., Chapel Hill, NC  
Sho Yano, M.D., North Bethesda, MD  
Anusha Yeshokumar, M.D., New York, NY  
Erica Youn, M.D., Lino Lakes, MN  
David Matthew Young, M.D., San Francisco, CA  
Carla Zingariello, M.D., Philadelphia, PA  
Julie Ziobro, M.D., Denver, CO

### ChiN MOC

Maria Teresa Acosta, M.D., Bethesda, MD  
Jameel Husain Arastu, M.D., New Hartford, NY  
Nancy Ellyn Bass, M.D., University Heights, OH  
Joshua Leitch Bonkowsky, M.D., Ph.D., Salt Lake City, UT  
Leslie Helen Boyce, M.D., Cary, NC  
Colleen Marie Buhrfiend, M.D., Elmhurst, IL  
Liliah Cantor, M.D., Mahopac, NY  
Shubhangi Chandrashekhar Chitnis, M.D., Elk Grove, CA  
Steven T. DeRoos, M.D., Grand Rapids, MI  
Brian Michael Faux, M.D., San Antonio, TX  
Steven Michael Gottlieb, M.D., Lititz, PA  
Suja Anne Joseph, M.D., MBBS, Brookfield, WI  
Peter Isaak Karachunski, M.D., Minneapolis, MN  
Michael Dennis Katz, M.D., Hackensack, NJ

Azimuddin Kabiruddin Kazi, M.D., Shelton, CT  
Gail Lynn Kennedy, M.D., Champaign, IL  
Hyunmi Kim, M.D., Atlanta, GA  
Mark Willard Koukkari, M.D., San Jose, CA  
Lauren LaFortune, M.D., Medford, MA  
Lenora Moore Lehwald, M.D., Dublin, OH  
Amit Malhotra, M.D., Redwood City, CA  
M. Eileen McCormick, D.O., Franklin, MI  
Stephen Hamilton Mott, M.D., Santa Ana, CA  
Ann Martha Neumeyer, M.D., Wayland, MA  
Debra Maureen O'Donnell, M.D., Louisville, KY  
Nitin Chandra Patel, M.D., M.P.H., Columbia, MO  
Ivan Mark Pavkovic, M.D., Astoria, NY  
Peter Christian Raffalli, M.D., North Andover, MA  
Naila Naureen Rana, M.D., Ashburn, VA  
Farhad Sahebkar-Moghaddam, M.D., Malibu, CA  
Lalania Kaye Schexnayder, M.D., Ph.D., Baton Rouge, LA  
Navreet Sidhu, M.D., Atlanta, GA  
Gerald Mendoza So, M.D., Plano, TX  
Kyle Jared Steinman, M.D., M.A.S., Seattle, WA  
William Andrew Weiss, M.D., San Francisco, CA  
Susan Teale Arnold, M.D., Dallas, TX  
Todd Michael Arthur, M.D., Cincinnati, OH  
Ronald E. Barabas, M.D., Wall Township, NJ  
Luis E. Bello-Espinosa, M.D., Calgary, AB  
Ashura Williams Buckley, M.D., Bethesda, MD  
William Bryan Burnette, M.D., Nashville, TN  
Paul Richard Carney, M.D., Chapel Hill, NC  
Sabrina Underwood Carter, M.D., Santa Barbara, CA  
Agnes Huang Chen, M.D., Cypress, CA  
Abigail Elizabeth Collins, M.D., Aurora, CO

John Ross Crawford, M.D., San Diego, CA  
Ramon Fontanilla Cuevas, M.D., Highlands Ranch, CO  
Maria E. Davila, M.D., Dorado, PR  
James Joseph Dowling, M.D., Toronto, ON  
Zheng Fan, M.D., Chapel Hill, NC  
Timothy Charles Foster, M.D., Squaw Valley, CA  
Heather Jean Fullerton, M.D., San Francisco, CA  
William Brian Gallentine, D.O., Cary, NC  
Satyanarayana Gedela, M.D., Hilliard, OH  
Debabrata Ghosh, M.D., Columbus, OH  
Joseph Gerard Gleeson, M.D., San Diego, CA  
Mark P. Gorman, M.D., Boston, MA  
Annette Elissa Grefe, M.D., Winston Salem, NC  
Barbara Elizabeth Hallinan, M.D., Ph.D., Loveland, OH  
Chellamani Harini, M.D., Westborough, MA  
Bobbi Jo Hopkins, M.D., Lakewood Ranch, FL  
Huiyuan Jiang, M.D., Ph.D., Perrysburg, OH  
Kevin R. Joseph, D.O., Mercer Island, WA  
Mohamed Ammar Katerji, M.D., Westmont, IL  
Sudha Kilaru Kessler, M.D., Philadelphia, PA  
Yasmin Khakoo, M.D., New York, NY  
Jennifer Meesuk Kwon, M.D., Pittsford, NY  
Pramote Laoprasert, M.D., Englewood, CO  
Kerri Lynn Larovere, M.D., Andover, MA  
Jason T. Lerner, M.D., Beverly Hills, CA  
Zhicheng Li, M.D., Wilmington, NC  
David Nathan Lieberman, M.D., Ph.D., Boston, MA  
Robert Dale Little, M.D., Scottsdale, AZ  
Zhao Liu, M.D., Peoria, IL  
Naomi J. Lubarr, M.D., Englewood, NJ  
Priti M. Manohar, M.D., McAllen, TX

Sabiha Merchant, M.D., Albertson, NY  
Ernesto Jose Millan, M.D., Tampa, FL  
Jonathan Walter Mink, M.D., Ph.D., Pittsford, NY  
Sameh Serry Wasfy Morkous, M.D., Kingston, PA  
Lara Elizabeth Morse, M.D., Chester, NJ  
Hema Raghuram Murali, M.D., Marshfield, WI  
Philip John Overby, M.D., Bronxville, NY  
Sonia Partap, M.D., Palo Alto, CA  
Anup Patel, M.D., Blacklick, OH  
John Patrick Phillips, M.D., Albuquerque, NM  
Douglas George Postels, M.D., Washington, DC  
Praveen B. Raju, M.D., Ph.D., New York, NY  
Malavalli N. Seetharam, M.D., Modesto, CA  
Rolla M. Shbarou, M.D., Hayesville, NC  
Renee Adele Shellhaas, M.D., M.S., Ann Arbor, MI  
Ednea Aparecida Simon, M.D., Seattle, WA  
Hae-Ri Song, M.D., New York, NY  
Ashakiran Jayasimha Sunku, M.D., Pueblo, CO  
Mary Elizabeth Sutton, M.D., Cincinnati, OH  
Christine Marie Tangredi, M.D., Winterville, NC  
Elizabeth Anne Thiele, M.D., Ph.D., Newton, MA  
Shanti Sengamalam Thirumalai, M.D., Ann Arbor, MI  
Jason Todd Umfleet, M.D., Hudsonville, MI  
Ignacio Valencia, M.D., Glenside, PA  
Alpa Vashist, M.D., Clarksville, MD  
Kristen Robert Wesselkamper, M.D., Cincinnati, OH  
Steven Parrish Winesett, M.D., St Petersburg, FL  
John David Wooten III, M.D., Raleigh, NC  
Rhonda Rachele Wright, M.D., Omaha, NE  
Eluen Ann Yeh, M.D., Grimsby, ON  
Sabrina Si Wai Yum, M.D., Media, PA

William Edward Zinser, M.D., Coppell, TX

### **CNP Cert**

Saheil Aboutalib, M.D., Long Beach, CA

Mohammad Abu-Rub, M.D., Arlington, VA

Ahmad Rida Abuzinadah, MBBS, Jeddah, Makkah

Deeksha Agrawal, M.D., Plain City, OH

Sherif Hassan Al-Hawarey, M.D., Bismarck, ND

Joseph C Alario, D.O., Colts Neck, NJ

Sasha Alick, M.D., Irving, TX

Abdulrahman Alwaki, M.D., Atlanta, GA

Timothy Michael Ambrose, M.D., Elkins Park, PA

Assad Amin, M.B.B.S., Decatur, GA

Dela Amoussou, M.D., Santa Barbara, CA

Katherine Melonakos Anetakis, M.D., Pittsburgh, PA

Hassan Arif, M.D., West Lafayette, IN

Kapil Arya, MBBS, Little Rock, AR

Adam Aubuchon, M.D., Cottonwood Heights, UT

Jose David Avila Loor, M.D., Danville, PA

Robert Baldwin, M.D., Williamsburg, VA

Huma Baqui, M.D., Holmdel, NJ

Derek Bauer, M.D., Charlottesville, VA

Karima Benameur, M.D., PTC, GA

Shawna W Benard, M.D., Santa Monica, CA

Pramit Bhasin, M.D., Russell, KY

Amar Bharat Bhatt, M.D., Chicago, IL

Santoshi Billakota, M.D., New York, NY

Ratna Bitra, M.B.B.S., Camas, WA

Michael Boffa, M.D., New York, NY

Murali Krishna Bogavalli, M.B.B.S., Lake Charles, LA

Katherine Bonsell, D.O., Tucson, AZ

Breta Boots, D.O., Westborough, MA

Samip Jayantilal Borad, M.B.B.S., MHA, M.D.,  
Charleston, WV

Michelle Marie Boudreau, D.O., Marlborough, CT

Kristin Brown, M.D., Houston, TX

Christian M. Cabrera Kang, M.D., Atlanta, GA

Tracie Anne Caller, M.D., Cheyenne, WY

Danny Michael Chachere II, MD, Houston, TX

Edward Chang, M.D., Torrance, CA

Haider S Chaudhry, M.D., Murphy, TX

Christopher Cheng, M.D., South Pasadena, CA

Sophia Huang Shao Cheng, M.D., Federal way, WA

Ramesh Cherukuri, M.D., New Hartford, NY

Jaehoon Cho, M.D., Shoreview, MN

Michelle Rose Christie, M.D., Dallas, TX

David Ta-wei Chuang, M.D., Tenafly, NJ

Erica Colligan, M.D., Astoria, NY

Adam Daniel Comer, M.D., Indianapolis, IN

Sharon Sue Cooperman, M.D., Edgewood, NM

Bryan Jeffrey Cupka, M.D., Baltimore, MD

Elakkat Dharmaraj Gireesh, M.D., Oviedo, FL

Victor Bach Doan, M.D., Westminster, CA

Natalia Dorland, M.D., Maple Grove, MN

Monisha Dutta, M.D., Memphis, TN

Brandi Susan Fleenor, M.D., Athens, GA

William John Freiberg, D.O., Pittsburgh, PA

Kareem Gadelmola, M.B.Ch.B., Dallas, TX

Joanna Juan Gan, M.D., Encino, CA

Rocio Carolina Garcia Santibanez, M.D., Atlanta, GA

Anjali Rita Garg, M.D., Wheaton, IL

Whitney Elizabeth Gauen, M.D., Indianapolis, IN

Shahram Gharibshahi, M.D., Sherman Oaks, CA  
Michael Galen Gibbs, M.D., Santa Barbara, CA  
Hui Gong, M.D., La Canada Flintridge, CA  
Whitney Alexandria Griffith, M.D., Lethbridge, AB  
Olivia Groover, M.D., Decatur, GA  
Eric Hyman Grover, M.D., Nashua, NH  
Rajesh Kumar Gupta, M.B.B.S., Fargo, ND  
Anai Cristina Hamasaki, M.D., Kansas City, KS  
Tariq Hamid, M.B.B.S., Jacksonville, FL  
David Paul Harris, M.D., Ann Arbor, MI  
Wenzhuan He, M.D., Roseland, NJ  
Walter Ferdinand Heine, M.D., Brookline, MA  
Aline Herlopian, M.D., New Haven, CT  
Lindsay Higdon, M.D., Philadelphia, PA  
Ernest Matthew Hoffman, D.O., Rochester, MN  
Smitha Karkada Holla, M.B.B.S., Janesville, WI  
Kimberly Houck, M.D., Houston, TX  
Myra Qi-Hua Hu, M.D., Davis, CA  
Christina Hupman, M.D., San Juan, PR  
Janielle Hyde, M.D., Rockledge, FL  
Mohammed Ilyas, M.B.B.S., Overland Park, KS  
Kenneth William Imerman, M.D., Albuquerque, NM  
Anna Iones, M.D., Short Hills, NJ  
Cindy Laura Jadoo, M.D., Forest Hills, NY  
Venkata Vamsy Jakkampudi, M.D., Mechanicsburg, PA  
Madhu Sreekanth Jasti, M.D., Ellicot City, MD  
Anuj Jayakar, M.D., Miami, FL  
Nicholas Nathaniel Jonas, M.D., Kirkland, WA  
Amy L. Jones, M.D., Madisonville, LA  
Artem Kaplan, M.D., New York, NY  
Samir Rameshchandra Karia, M.D., Louisville, KY

Elias Karroum, M.D. PhD, Bethesda, MD  
Jeffrey A. Kaufmann, M.D., Baltimore, MD  
Rana Kayal, M.D., Vienna, VA  
Fawad Ahmed Khan, M.D., Kenner, LA  
Muhammad Awais Khan, M.B.B.S., Tucson, AZ  
Jasdeep Kaur Khurana, M.B.B.S., West Reading, PA  
Inhyup Kim, M.D., Enid, OK  
Olivia S Kim McManus, M.D., Del Mar, CA  
Cory J. Kogelschatz, M.D., Murray, UT  
Olga Geniyevna Kozlova, M.D., Glenview, IL  
Sonia Krish, M.D., Hoboken, NJ  
Vaishnav Krishnan, M.D., Ph.D., Pearland, TX  
Yana Krutoshinskaya, M.D., Stony Brook, NY  
Michelle Kvalsund, D.O., East Lansing, MI  
Theresa LaBarte, D.O., Irvine, CA  
Jose Rafael Labault-Santiago, M.D., Wellington, FL  
Christopher Laohathai, M.D., Leander, TX  
Thomas Leahy, M.D., Buffalo, NY  
Michael Jay Leffler-McCabe, M.D., Minneapolis, MN  
Joshua Leibner, M.D., Jupiter, FL  
Christopher B. Lening, M.D., Los Angeles, CA  
Jay Howard Levin, M.D., Hadley, MA  
Lu Lin, M.D., Wellesley, MA  
Natalie Litvinsky, M.D., Buffalo Grove, IL  
Karlo John Lizarraga Mendoza, M.D., Lancaster, NY  
Samantha LoRusso, M.D., Columbus, OH  
Xiaoying Lu, M.B.B.S., La Jolla, CA  
Anibal Lugo, M.D., Findlay, OH  
Brian Nils Lundstrom, MD, Rochester, MN  
Paul Ryan MacDonald, M.D., Phoenix, AZ  
Peter J Maceroni, D.O., Celina, OH



Catherine Ebinimi Mamah, M.D., Seattle, WA

Dana Marafi, M.B.Ch.B., Houston, TX

Shawnay Mazell, M.D., Atlanta, GA

Brooke N. McQueen, M.D., Pearland, TX

Rosina Medel, M.D., Minot, ND

Mona Girish Mehta, M.D., Sun City West, AZ

Anza Bilal Memon, M.B.B.S., Novi, MI

Yara Mikhaeil-Demo, M.D., Chicago, IL

Sunita Misra, M.D., Chicago, IL

Sotiris Mitropanopoulos, M.D., Rochester, MN

Diana Mnatsakanova, M.D., Iowa City, IA

Mineshkumar Umesh Morker, M.D., Sycamore, IL

Argirios Moustakas, M.D., M.S.C., South Burlington, VT

Robert J Murphy, M.D., Wichita, KS

Nassim Naderi, M.D., Houston, TX

Hiroki Nariai, M.D., Agoura Hills, CA

Arshi Naz, M.D., Liberty Township, OH

Alexis Nelson, M.D., Anchorage, AK

Blake Newman, M.D., Salt Lake City, UT

Galina Vladimirovna Nikolskaya, M.D., Harbor city, CA

Emad R. Noor, M.B.Ch.B., East Brunswick, NJ

Waldemar Nowak, M.D., Naperville, IL

Gulshan Oberoi, M.B.B.S., Collins, MS

Ajitesh Ojha, M.D., Westlake, OH

James Park, D.O., Philadelphia, PA

Archana Patel, M.D., Boston, MA

Bandhu Paudyal, M.B.B.S., Lititz, PA

Joannes Jesse Anderson Paul, M.D., Delray Beach, FL

Krishna Pokala, M.D., Austin, TX

Douglas Ryan Porter, M.D., Marina Del Rey, CA

Russell Powell, M.D., Camarillo, CA

Punam Prabhakar, M.D., Bayside, NY

Eric Prince, M.D., Kenmore, WA

Abhishek Nimish Purohit, M.D., Abbotsford, BC

Rajsekar Rajaraman, M.D., Los Angeles,, CA

Komal Rastogi, M.D., San Antonio, TX

Bhrugav Raval, M.D., Webster, NY

Saria M Refai, M.D., Edmond, OK

Noemi Rincon-Flores, M.D., Tampa, FL

Marianna Stella Rivas-Coppola, M.D., Memphis, TN

Nathaniel Robbins, M.D., Lebanon, NH

Jayson Rodriguez, M.D., Mount Pleasant, SC

Clio Aracelli Rubinos, M.D., New York, NY

Holly Rutherford, M.D., New Orleans, LA

Fahed Saada, MD, Manlius, NY

Kapil Sachdeva, M.D., Glen Ellyn, IL

Raam Sambandam, M.D., Windermere, FL

Tristan Sands, M.D., New York, NY

Kumar Sannagowdara, M.B.B.S., BROOKFIELD, WI

Fernando Santos Pinheiro, M.D., Milwaukee, WI

Aparna Sarma, D.O., Fremont, CA

Alan Schmitt, M.D., Muncie, IN

Andrew Colin Schomer, M.D., Charlottesville, VA

Mark Schomer, M.D., Farmington, CT

Stephan Ulrich Schuele, M.D., Chicago, IL

Nirav Shah, M.B.B.S., Crowley, TX

Abdul Rauf Shaikh, M.D., Corner Brook, NL

Denys Shapovalov, M.D., Fleming Island, FL

Alexandra Shaw, M.D., Detroit, MI

Daniel Simmons, M.D., Windcrest, TX

David John Sinclair, M.D., Panama City, FL

Dong In Sinn, MD, San Francisco, CA

Jason A. Soriano, M.D., Marietta, GA  
Anthonette Alicia Sparman, M.D., Brooklyn, NY  
Frehiwot Temesgen, M.D., Gainesville, VA  
Sikawat Thanaviratananich, M.D., Ann Arbor, MI  
Drew Michael Thodeson, M.D., Dallas, TX  
Crystal Thomas, M.D., Reading, PA  
Adam Joseph Todd, M.D., Minneapolis, MN  
Trenton J Tollefson, M.D., Rochester, NY  
Kong Truong, M.D., Orange, CA  
Yi Jou Tsai, M.D., Atlanta, GA  
Ajay Tunguturi, M.B.B.S., Williston, VT  
Alfred Van Baak, M.D., Farmington, NM  
Parissa Isabelle Vassef, M.D., Santa Barbara, CA  
Danilo Vitorovic, M.D., Williston, VT  
Fernanda Wajnsztajn, M.D., new york, NY  
Even Wang, M.D., New Albany, OH  
Mariam Wasim, M.D., Cary, NC  
Beverly Smith Wical, M.D., Saint Paul, MN  
Jessica Whicker Williams, M.D., Fort Collins, CO  
Ge Xiong, M.D., Dallas, TX  
Cui Yang, M.D., marietta, GA  
Ahmed Moh'd Abdel Latif Yassin, M.B.B.S., Galveston, TX  
Muhammad Shahzad Zafar, M.B.B.S., Durham, NC  
Sahar Zafar, M.D., Cambridge, MA  
Behrouz Zamanifekri, M.D., Charlotte, NC  
Warren Zeigler, D.O., Orem, UT  
Ling Zhang, M.D., Memphis, TN  
Jun Zhao, M.D., Yorktown, VA

## **CNP MOC**

Hoda Zakaria Abdel-Hamid, M.D., Pittsburgh, PA

Tamer Y. Abou-elsaad, M.D., Mason, OH  
Amy Hansen Akers, M.D., Burlingame, CA  
Cigdem Inan Akman, M.D., Haworth, NJ  
Roula Al-Dahhak, M.D., Saint Louis, MO  
Muhammad Majid Al-Kaylani, M.D., Dubai, Dubai  
Anjaneyulu Alapati, M.D., Huntsville, AL  
Aissa Timofeyevna Alexeeva, M.D., East Windsor, NJ  
Iqbal-Husein Najaf Allarakhia, M.D., Troy, MI  
Mahmood Ghiyath Alnahass, M.D., Valparaiso, IN  
Amy Nicole Hill Amick, M.D., Bedford, MA  
Ximena Arcila-Londono, M.D., Troy, MI  
Tarif Bakdash, M.D., MHSc, Flowood, MS  
Maria Elizabeth Sara Baldwin, M.D., Pittsburgh, PA  
Gary Harvey Belt, M.D., Woodcliff Lake, NJ  
Steven Benedict, M.D., Sandusky, OH  
Armita Bijari, M.D., Oak Brook, IL  
Donald Waring Blair, M.D., Springfield, MA  
Larry Lee Blankenship Jr., M.D., Anderson, IN  
Margo Lynn Block, D.O., Lees Summit, MO  
Cynthia Leta Bodkin, M.D., Carmel, IN  
Robbie Donald Buechler, M.D., Ph.D., Charlotte, NC  
Julio Cesar Cantero, M.D., Sarasota, FL  
Chad Edward Carlson, M.D., Milwaukee, WI  
Michael Zane Chesser, M.D., Sherwood, AR  
Joseph F. Drazkowski, M.D., Phoenix, AZ  
Matthew Alan Robinson Eccher, M.D., Beachwood, OH  
Richard Eamon Ferguson, M.D., East Aurora, NY  
Mark Anthony Ferrante, M.D., Memphis, TN  
Justin Robert Fisher, M.D., Manheim, PA  
Olga Fishman, M.D., Campbell Hall, NY  
Nancy Rose Foldvary-Schaefer, D.O., M.S., Cleveland, OH

Kenneth Aron Fox, M.D., San Francisco, CA  
Robert Carroll Frere, M.D., Greenville, NC  
Paula Anne Gerber-Gore, M.D., Portland, OR  
Behzad Habibi Khameneh, M.D., Danbury, CT  
Shahin Hakimian, M.D., Seattle, WA  
Shailaja Hari, M.D., Dayton, OH  
Sheri Lyn Hart, M.D., Powell, OH  
Wendell Raymond Helveston, M.D., Hattiesburg, MS  
Thomas Michael Holmes, M.D., Marietta, GA  
Jennifer Lynn Hopp, M.D., Fulton, MD  
Mircea Tudorel Iacob, M.D., Elmhurst, IL  
Masanori Igarashi, M.D., Memphis, TN  
Mercedes Paula Jacobson, M.D., Wynnewood, PA  
Kathleen Donovan Kennelly, M.D., Jacksonville, FL  
Sany Tawfik Khabbaz, M.D., Green Bay, WI  
Prabhjot Singh Khalsa, M.D., Fremont, CA  
Sina Khasani, M.D., Brooklyn, NY  
Abdul Latif Khuhro, M.D., Hilliard, OH  
John Collins Kincaid, M.D., Indianapolis, IN  
Brian Nolan Kirschner, M.D., Farmington Hills, MI  
Jacob Manoj Kitchener, M.D., Springfield, IL  
David Young-Su Ko, M.D., Pasadena, CA  
Paul Robert Kowalski, M.D., peoria, AZ  
Eric Edward Kraus, M.D., Seattle, WA  
Michael James Kushner, M.D., Wilson, NC  
Leslie Hui-Lin Lee, M.D., Palo Alto, CA  
Clarissa Jiang Liew, M.D., Slatington, PA  
John Hume Lucas IV, M.D., Charleston, SC  
Jin Jun Luo, M.D., Ph.D., Wynnewood, PA  
Daniel James L. MacGowan, M.D., New York, NY  
Shawn Lesley Masia, M.D., Port Washington, NY

Amy Lee McGregor, M.D., Memphis, TN  
James Robert McLaughlin, D.O., Franklin, PA  
Steven Lee Meyers, M.D., Skokie, IL  
James Layne Moore, M.D., M.P.H., Northfield, MN  
Katherine A. Mortati, M.D., Brooklyn, NY  
Ali Mohamad Moussaoui, M.D., Webster, TX  
Abirami Muthukumaran, M.D., Thousand Oaks, CA  
Jaishree Narayanan, M.D., Glenview, IL  
Thien Tuong Nguyen, M.D., Ph.D., Potomac, MD  
Mihaela Mihaescu Nowak, M.D., Indiana, PA  
Sunila E. O'Connor, M.D., Shorewood, WI  
Oladotun Ademola Okunola, M.D., Hoboken, NJ  
Adriana E. Palade, M.D., Louisville, KY  
Lawrence Allen Pardee III, M.D., Canandaigua, NY  
Erasmus Andre Passaro, M.D., Tierra Verde, FL  
Dharmesh R. Patel, M.D., Vestal, NY  
Phillip Lawrence Pearl, M.D., Boston, MA  
Edwin Nelson Peguero, M.D., Tampa, FL  
Yen-Yi Peng, M.D., Reno, NV  
Osvaldo Hector Perurena, M.D., Temple, TX  
Gordon W. Peterson, M.D., Loma Linda, CA  
Noor Ali Pirzada, M.D., Monclova, OH  
Nima Ramezan-Arab, M.D., Newport Beach, CA  
Mark David Reploeg, M.D., Corvallis, OR  
Steven Patrick Rider, M.D., Knoxville, TN  
James John Riviello Jr., M.D., Houston, TX  
Shari Leigh Rosen-Schmidt, M.D., Plano, TX  
Sadia Saba, M.D., Plainfield, IN  
Vicenta Salanova, M.D., Bloomington, IN  
Maria Caridad Sam, M.D., Kernersville, NC  
Elizabeth Samuel, M.D., Carrollton, TX

Amandeep Singh Sangha, M.D., Glen Allen, VA  
Ahmad Mouaz Sbei, M.D., Flint, MI  
Ardeep Kaur Sekhon, M.D., Sacramento, CA  
Alpa Kiran Shah, M.D., Carrollton, TX  
Aziz Ismail Taher Shaibani, M.D., Houston, TX  
Volney Leo Sheen, M.D., Boston, MA  
Steven Anthony Sherman, M.D., Adrian, MI  
Todd Brook Silverman, M.D., Chesterfield, MO  
Drasko Simovic, M.D., Boston, MA  
Christopher Michael Sinclair, M.D., Port Jefferson, NY  
John Robinson Singleton, M.D., Salt Lake City, UT  
Kavita Sinha, M.D., Warren, NJ  
George Alan Small, M.D., Pittsburgh, PA  
Greg Nelson Smith, M.D., Louisville, KY  
Rodney Wayne Sorensen, D.O., Marshfield, WI  
Mikula Karmen Stambuk, M.D., M.A., Denver, CO  
Roy Sucholeiki, M.D., Inverness, IL  
Ron Tintner, M.D., Houston, TX  
Evgeny Ilych Tsimerinov, M.D., Encino, CA  
Roxanne Marie Valentino, M.D., Hendersonville, TN  
Leonie Maria Anne Van Passel, M.D., Sarasota, FL  
Vettaikorumakankav V. Vedanarayanan, M.D., Jackson, MS  
Michael Louis Vertino, M.D., Syracuse, NY  
Jorge Alberto Vidaurre, M.D., Upper Arlington, OH  
Tuan Hoang Vu, M.D., Lutz, FL  
Jacqueline McFarland Washington, M.D., Decatur, GA  
Mary Ann Werz, M.D., Ph.D., Sauk City, WI  
David Brockman Wheeler, M.D., Ph.D., Casper, WY  
Korwyn L. Williams, M.D., Ph.D., Phoenix, AZ  
Shelley Dianne Williams, M.D., Evans City, PA

James Won, M.D., Irvine, CA  
Claudia Patricia Zimmermann, M.D., Corpus Christi, TX  
Zaheer Ahmed, M.D., Ballwin, MO  
Aaron Patrick Johnson, M.D., Girdwood, AK  
Daniel Thomas Mattson, M.D., Bridgeton, MO  
Venkat K.C. Rao, M.D., Saint Louis, MO

### **EP Cert**

Amro Mohammed Abdulsattar, M.D., North Wales, PA  
Lisa Puthuparampil Abraham, M.D., Asheville, NC  
Eugene Youssef Achi, M.D., Broussard, LA  
Rajkumar Agarwal, M.B.B.S., Troy, MI  
Puja Aggarwal, M.D., Pittsburgh, PA  
Mark Andrew Agostini, M.D., Dallas, TX  
Shubhi Agrawal, M.B.B.S., Baltimore, MD  
Asra Akbar, M.D., Shenandoah, TX  
Abdullah Al Sawaf, M.B.B.S., Springfield, IL  
Fatima Alao, M.D., Charleston, IL  
Dara Victoria Freeman Albert, D.O., Bexley, OH  
Irfan Ali, M.D., Stafford, TX  
Mazen Alkhwaji Almidani, M.D., ROUND ROCK, TX  
Hamada Hamid Altalib, D.O., New Haven, CT  
Abdulrahman Alwaki, M.D., Atlanta, GA  
Brian L Appavu, M.D., New York, NY  
Ebinehita Arhebamen, M.D., Indian Land, SC  
Karina Mae Arkush, M.D., Milwaukee, WI  
Tomi Lillian Ashaye, M.D., Wheeling, IL  
Thandar Aung, M.B.B.S., Cleveland, OH  
Sreenivas Kumar Avula, M.D., Dunlap, IL  
Erika Takle Axeen, M.D., Charlottesville, VA  
Mohan Prabu Ayyaswamy, M.D., west lafayette, IN

Tarif Bakdash, M.D., MHSc, Flowood, MS

Rubina Yakub Bakerywala, M.D., Jacksonville, FL

Seema Bansal, M.D., Oak Brook, IL

Helen Irene Barkan, M.D., Ph.D., Vestavia Hills, AL

Niravkumar V. Barot, M.B.B.S., Philadelphia, PA

Anu Baweja, M.B.B.S., Ames, IA

Joshua Joy Bear, M.D., Denver, CO

Melissa Lauren Bernbaum, M.D., Dix Hills, NY

Liya Beyderman, M.D., Charlotte, NC

Annapoorna Bhat Ramachandra, M.B.B.S., Albuquerque, NM

Stephan Bickel, MD, PhD, Manhasset, NY

Robert Burton Blake, M.D., Carmel, IN

Leah Blank, M.D., Philadelphia, PA

Hal Blumenfeld, M.D., Ph.D., New Haven, CT

Gary Bruce Bobele, M.D., San Antonio, TX

Robert Drake Bolen, M.D., Charleston, SC

Deana Bonno, M.D., Ithaca, NY

Eilis Ann Boudreau, M.D., Ph.D., Lake Oswego, OR

Maria Jose Bruzzone Giraldez, M.D., Chicago, IL

Katie Bullinger, M.D., Atlanta, GA

Bonnie Lynn Bunch, M.D., Ph.D., Sioux Falls, SD

John Paul Bunka, D.O., Kalamazoo, MI

Debra Lynn Byler, M.D., Harrisburg, PA

Mark Callow, M.D., Mason, OH

Zeke Morgan Campbell, M.D., Mount Pleasant, SC

Jennifer Cavitt, M.D., Wyoming, OH

Haider S Chaudhry, M.D., Murphy, TX

Jennifer Chu, M.D., Houston, TX

Abraham Seung Chul Chyung, M.D., Ph.D., San Diego, CA

Mario Tarell Coleman, M.D., Colorado Springs, CO

Elizabeth Teresa Corbo, M.D., Middletown, NJ

Daniel J Correa, M.D., New York, NY

Liviu Ciprian Craciun, M.D., Hackensack, NJ

Elizabeth Cruz, M.D., Memphis, TN

Heidi Currier, M.D., Edina, MN

Dina Dahan, M.D., Orlando, FL

Jessica Lynn Danison, D.O., Greenville, NC

Proleta Datta, M.D., San Francisco, CA

Ehab Dayyat, M.D., Collierville, TN

Tammam Dayyoub, M.D., Oklahoma City, OK

Christopher Anthony DeCock, M.D., Fargo, ND

David Harris Delman, M.D., Lake Oswego, OR

David Houston Dennison, M.D., Alexandria, VA

Seth Philip DeVries, M.D., Grand Rapids, MI

Jennifer Laurel DeWolfe, D.O., Hoover, AL

Joseph Aaron Diamond, M.D., New York, NY

Dan-Andrei Dimitriu, M.D., Davidson, NC

Hardik Rashmikant Doshi, M.B.B.S., Pueblo, CO

Laurie McGonigle Douglass, M.D., Reading, MA

Rotem Laszlo Abraham Elgavish, M.D., Ph.D., Englewood, CO

Colin Ellis, M.D., Jenkintown, PA

Mona Saber Abdelmonem Elsayed, M.B.Ch.B., Grand Rapids, MI

Rachel R. Fabris, M.D., Grand Rapids, MI

Steven Factor, M.D., Philadelphia, PA

Stephen Joseph Falchek, M.D., Wynnewood, PA

Pei'en Fan, M.D., Mercer Island, WA

Raquel Farias-Moeller, M.D., Menomonee Falls, WI

Enrique Alfredo Feoli, M.D., Short Hills, NJ

Guadalupe Fernandez Baca Vaca, MD, Beachwood, OH

Lindsay Catherine Ferraro, M.D., Schenectady, NY

Timothy John Feyma, M.D., Saint Paul, MN  
Tiffany Latreece Fisher, M.D., Palmyra, PA  
Mark P Fitzgerald, M.D., Villanova, PA  
Alexia Flangini, M.D., Chattanooga, TN  
Alexander Fong, M.D., Shawnee, KS  
Matthew Blake Freeman, M.D., Lakeway, TX  
Genevieve Khonghun Gabriel, M.D., Little Rock, AR  
William Davis Gaillard, M.D., Chevy Chase, MD  
Joshuae German Gallardo, M.D., Fort Lauderdale, FL  
Thomas Higgins Gann, M.D., Mandeville, LA  
Naiara Garcia Losarcos, MD, South Euclid, OH  
Ricardo Garcia-Rivera, M.D., Homestead, FL  
Rebecca Garcia-Sosa, M.D., Chicago, IL  
Aaron Geller, M.D., New York, NY  
Taha Gholipour, M.D., Boston, MA  
Ryan Michael Gleason, M.D., Waxhaw, NC  
Ajay Goenka, M.B.B.S., Beavercreek, OH  
Jeffrey Joseph Gold, M.D., La Jolla, CA  
Alana Shira Golden, M.D., Portland, OR  
Shaila Gowda, M.D., San Antonio, TX  
Arthur Christopher Grant, M.D., Ph.D., Brooklyn, NY  
Mary Lee Gregory, M.D., Ph.D., Augusta, GA  
Zachary Grinspan, M.D., New York, NY  
Rejean Guerriero, D.O., St. Louis, MO  
Vikas Gupta, M.D., Camillus, NY  
Khatuna Gurgenchvili, M.D., Chambersburg, PA  
Camilo Alejandro Gutierrez, M.D., Baltimore, MD  
Kevin Frederick Haas, M.D., Ph.D., Nashville, TN  
Christa Habela, M.D., Baltimore, MD  
Kenneth Richmond Habetz, M.D., Lafayette, LA  
Barbara Ewa Hager, M.D., Fort Collins, CO

Cliff Hampton, M.D., Hayden, ID  
David Paul Harris, M.D., Ann Arbor, MI  
Maria Iren Hella, M.D., Gainesville, FL  
Heidi L. Henninger, M.D., Yarmouth, ME  
Julia Marie Henry, M.D., Chicago, IL  
Aline Herlopian, M.D., New Haven, CT  
Lindsay Higdon, M.D., Philadelphia, PA  
Thomas William Hoang, M.D., New York, NY  
Robert Edward Hogan, M.D., Saint Louis, MO  
James Thomas Houston, M.D., Birmingham, AL  
David Ambrose Hsu, MD PhD, Madison, WI  
Myra Qi-Hua Hu, M.D., Davis, CA  
Ilona Spitsyna Humes, M.D., Concord, NC  
Ammar Hussain, M.B.B.S., Cary, NC  
Monica Parveen Islam, M.D., Columbus, OH  
Claire Sigrid Jacobs, M.D., Watertown, MA  
Mei Jiang, M.D., Marshfield, WI  
Amy Catherine Jongeling, M.D., Brooklyn, NY  
Arif Kabir, M.D., Baltimore, MD  
Kristina Natalia Karanec, D.O., Ada, MI  
Akshat Katyayan, M.B.B.S., Boston, MA  
Ikram Waheed Khan, M.D., Little Rock, AR  
Iqbal Akhtar Yar Khan, M.D., M.S., Columbia, MO  
Nabil Khandker, M.D., Columbus, OH  
Andrew J. Kim, M.D., Los Angeles, CA  
Olivia S Kim McManus, M.D., Del Mar, CA  
Heidi Elyse Kirsch, M.D., San Francisco, CA  
Jacob Manoj Kitchener, M.D., Springfield, IL  
Pavel Klein, M.D., Bethesda, MD  
Sonya Monique Knight, D.O., Plymouth Meeting, PA  
Lisa Knopf, M.D., Providence, RI

Andrew Tyler Knox, M.D., Madison, WI  
Naira Kocharian, M.D., La Jolla, CA  
Supriya Kohli, M.B.B.S., Cookeville, TN  
Sreekanth Koneru, M.D., Ashland, KY  
Robert Joseph Kotloski, M.D. Ph.D., Fitchburg, WI  
Ewa Irina Koziorynska, M.D., New York, NY  
Kelly Marie Kremer, M.D., Zionsville, IN  
Sonia Krish, M.D., Hoboken, NJ  
Jena Krueger, M.D., Hudsonville, MI  
Abby Bergholtz Kunz, M.D., Albuquerque, NM  
Jaclyn Maureen Laine, D.O., Columbus, OH  
Saurabh Lalan, M.B.B.S., Metairie, LA  
Matt Spencer Lallas, M.D., Los Angeles, CA  
Cory Dwayne Lamar, M.D., Winston Salem, NC  
Marcelo Elias Lancman, M.D., New York, NY  
Jennifer Ellen Langer, M.D., Free Union, VA  
Christopher Laohathai, M.D., Leander, TX  
Carlos R. Lastra, M.D., New Brunswick, NJ  
Linda Carol Laux, M.D., Chicago, IL  
Janki Lavingia, M.B.B.S., Springfield, IL  
Jong Woo Lee, M.D., Ph.D., Newton, MA  
Beth Ami Leeman-Markowski, M.D., Pleasantville, NY  
Dalila Watford Lewis, M.D., Derwood, MD  
Anli Annie Liu, M.D., M.A., Brooklyn, NY  
Zhao Liu, M.D., Peoria, IL  
Matthew Luedke, M.D., Durham, NC  
Brian Nils Lundstrom, MD, Rochester, MN  
Anastasia Luniova, M.D., Grand Rapids, MI  
Yitao Ma, M.D. PhD, Bethesda, MD  
Jennifer Elyse Madan Cohen, M.D., West Hartford, CT  
John Lawson Magruder, M.D., Morgantown, WV

Naznin A Mahmood, M.D., Ann Arbor, MI  
Gayatra Mainali, M.D., Hershey, PA  
Kanishk Makhija, M.B.B.S., New Delhi, DEL  
Monica Makhija, M.D., Brookline, MA  
Chetan R Malpe, M.D., Brooklyn, NY  
Arthur Michael Mandel, M.D., Ph.D., New York, NY  
Lara Vanessa Marcuse, M.D., Brooklyn, NY  
Joshua Martin, M.D., Indianapolis, IN  
Jesus Felix Martinez, M.D., Cordova, TN  
Nikolas Andre Mata-Machado, M.D., Chicago, IL  
Sarita Maturu, D.O., Marion, OH  
Abdul Hussein Ali Mazin, M.D., MRCP, Oak Park, IL  
Tanya Joelle Williams McDonald, M.D., Baltimore, MD  
Heather Ravvin McKee, M.D., Cincinnati, OH  
Anita Khanna Mehta, D.O., Mountainside, NJ  
Fadi William Mikhail, M.D., Philadelphia, PA  
Daniella Miller, M.D., New Orleans, LA  
David Miller, M.D., Malden, MA  
Tracey Anne Milligan, M.D., Weston, MA  
Chandrabhaga Miskin, M.D., New Brunswick, NJ  
Anna-Marieta Moise, M.D., Asheville, NC  
Jose Montes-Rivera, M.D., West Hartford, CT  
Brian Moran, M.D., Duluth, MN  
Lindsey Morgan, M.D., Seattle, WA  
John Christopher Morris, M.D., Winston-Salem, NC  
Katherine A. Mortati, M.D., Brooklyn, NY  
Manal Emad Moustafa, M.D., Atlanta, GA  
Claudia Alejandra Munoz, M.D., MPH, Pasadena, CA  
Eniko Nagy-Wilde, M.D., Sacramento, CA  
Sunil Chandrakant Naik, M.D., Charleston, WV  
David Earl Naylor, M.D., Ph.D., Los Angeles, CA

Aneesh Neekhra, M.B.B.S., Peoria, IL  
Christopher Newey, D.O., Richfield, OH  
Elizabeth A Ng, MD, Fishkill, NY  
Jeffrey Scott Nicholl, M.D., New Orleans, LA  
Ahmad Nizam, M.D., Phoenix, AZ  
Danielle Nolan, M.D., Royal Oak, MI  
Shani Kay Norberg, M.D., Saint Paul, MN  
Sunjay Nunley, M.D., Greenville, SC  
Emily Rachael Nurre, M.D., Mason, OH  
Nicole Helene Odom, M.D., Pinehurst, NC  
Michael Stefan Oldham, M.D., Cincinnati, OH  
Pedro Santos Oliveira, M.D., Baton Rouge, LA  
Kenichiro Ono, D.O., Richmond, VA  
Vitor Hugo Pacheco, M.D., Houston, TX  
Lindsay Morgan Pagano, M.D., Nashville, TN  
Vijay Shanker Pampana, M.B.B.S., hillsborough, NJ  
Vikas Pandey, M.D., Dallas, TX  
Anup Panduranga, M.D., Hillsboro, OR  
Trudy Di Pang, M.D., Brookline, MA  
Arthur Partikian, M.D., Los Angeles, CA  
Archana Pasupuleti, M.D., Washington, DC  
Allamprabhu S. Patil, M.D., Melville, NY  
Sita Paudel, M.B.B.S., Sioux Falls, SD  
Page Buckhannan Pennell, M.D., Boston, MA  
Angela Peters, M.D., Salt Lake City, UT  
Paul Charles Peterson, M.D., Raleigh, NC  
Michael Robert Pietak, M.D., Durham, NC  
Galyna Pushchinska, M.D., Selden, NY  
Mark Stephen Quigg, M.D., MSc, Charlottesville, VA  
Ramya Raghupathi, M.B.B.S., Cleveland, OH  
Mandeep Rana, M.D., Brookline, MA

Malathi Shivaji Rao, D.O., Chicago, IL  
Appaji Rayi, M.B.B.S., Charleston, WV  
Babak Razavi, M.D., Ph.D., Palo Alto, CA  
Noemi Rincon-Flores, M.D., Tampa, FL  
Shelly Rishty, M.D., Eatontown, NJ  
Neggy Rismanchi, M.D., San Diego, CA  
Rowena Engracia Foronda Rivera, M.D., Hummelstown, PA  
Yvan Tran Rodrigues, M.D., Grand Rapids, MI  
Andy Rodriguez, M.D., Mountainside, NJ  
Alyssa Rachel Rosen, M.D., Wynnewood, PA  
Jillian Lee Rosengard, M.D., New York, NY  
Eric Scott Rosenthal, M.D., Weston, MA  
Benjamin Alexander Ross, M.D., Denver, CO  
Alok Sachdeva, M.D., Ann Arbor, MI  
Ezekiel Sachs, M.D., Houston, TX  
Vishwanath Sagi, M.B.B.S., Louisville, KY  
Ai Sakonju, M.D., Jamesville, NY  
Maria Caridad Sam, M.D., Kernersville, NC  
Leyda G. Sanchez-Ortiz, M.D., San Juan, PR  
Tristan Sands, M.D., New York, NY  
Aparna Sarma, D.O., Fremont, CA  
Erik Sass, M.D., Davidson, NC  
Andrew Colin Schomer, M.D., Charlottesville, VA  
Indranil Sen-Gupta, M.D., Fullerton, CA  
Zhiyi Sha, M.D., Plymouth, MN  
Mouhsin Shafi, M.D., Brookline, MA  
Sona Kantilal Shah, M.D., Huntington, WV  
Umang Shah, M.D., Brookfield, WI  
Yasser Shahrour, M.D., Charleston, WV  
Minoo Shams Moorkani, M.D., Maple Grove, MN



Uzma Sharif, M.D., Philadelphia, PA

Noa Dvora Sheikin, M.D., Brooklyn, NY

Anumeha Sharma Sheth, M.B.B.S, Arlington, VA

Richard Joseph Simmons, M.D., Mechanicville, NY

Gurjeet Singh, M.D., Camas, WA

Jaysingh Singh, M.D., Rochester, MN

Vikas Singh, M.B.B.S., Overland Park, KS

Divya Singhal, M.D., Muskogee, OK

Samata Singhi, M.D., Baltimore, MD

Claudine G Sinsioco, M.D., Silver Spring, MD

Adithya Sivaraju, M.B.B.S., Stamford, CT

Holly Jean Skinner, D.O., Winter Springs, FL

Lisa Helene Smith, M.D., Indianapolis, IN

Steven J Smith, M.D., Brooklyn, NY

Yuliya Snyder, M.D., Rochester, NY

Eva Lene Sorensen, MD, Encinitas, CA

Nadia Sotudeh, M.D., Scarsdale, NY

Maija Steenari, M.D., Aliso Viejo, CA

Nakita Stephens, M.D., Cedar Falls, IA

Alejandra Maria Stewart, M.D., Charlotte, NC

Fahd Sultan, M.B.B.S., Oklahoma City, OK

Ai Sumida, M.D., Lubbock, TX

Jean Sun, M.D., Hoffman Estates, IL

Swapna Surabhi, M.D., Gainesville, FL

Arun Swaminathan, M.B.B.S., Philadelphia, PA

Thirukandeeswaram Rangaswa Swaminathan, M.D.,  
Memphis, TN

Kellie Sue Sweet, D.O., Kalamazoo, MI

Khalid Zuhayr Tabbarah, M.D., New Providence, NJ

Sudha Sudhakar Tallavajhula, M.B.B.S., Sugar Land, TX

Priyamvada Tatachar, M.D., Chicago, IL

Jessica Warady Templer, M.D., Evanston, IL

Ovictor Leo Roldan Tesoro, M.D., Sioux Falls, SD

Sikawat Thanaviratananich, M.D., Ann Arbor, MI

Elizabeth Anne Thiele, M.D., Ph.D., Newton, MA

Crystal Thomas, M.D., Reading, PA

Serena Thompson, M.D., Cleveland, OH

Konstantin Timofeev, M.D., Altamont, NY

Tricia Yee-Chee Ting, M.D., Bethesda, MD

Francis Geronimo Tirol, M.D., Washington, DC

Trenton J Tollefson, M.D., Rochester, NY

Mohamed Babiker Mohamed Tom Bakhit, M.B.B.S.,  
Saint Louis, MO

Stuart Tomko, M.D., University City, MO

Tung Thanh Tran, M.D., Chapel Hill, NC

Cristina Corina Trandafir, M.D., Salt Lake City, UT

Amy Elizabeth Trecartin, M.D., Cohasset, MA

Joyce Tsai, M.D., Fort Lee, NJ

Connie Ching Yi Tsang, M.D., Concord, NC

Pavan Tummala, M.B.B.S., Springfield, MO

Jason Todd Umfleet, M.D., Hudsonville, MI

Roya Vakili, M.D., westlake, OH

Michelle Ubels Van Noord, M.D., San Diego, CA

Stephen Anthony VanHaerents, M.D., Chicago, IL

Mariel Marques Velez, M.D., San Carlos, CA

Swathi Vijayaraghavan, M.D., Moorestown, NJ

Vijay Vishwanath, M.D., Ph.D., Watervliet, NY

Thuy-Anh Hoang Vu, M.D., Fairfax, VA

Jessica June Walter, M.D., Palo Alto, CA

Yue Wang, M.D., Gainesville, FL

Meghan Ward, M.D., Salt Lake City, UT

Paula Province Warren, M.D., Hattiesburg, MS

Vibhangini Sanjay Wasade, M.D., Bloomfield Hills, MI  
Michael Watkins, M.D., Manvel, TX  
Sarah E Weatherspoon, M.D., Memphis, TN  
Amanda R Weber, D.O., Harrison Twp, MI  
Tracy Lee Weimer, M.D., Morgantown, WV  
Korwyn L. Williams, M.D., Ph.D., Phoenix, AZ  
Sara McCrone Winchester, M.D., Gulf Breeze, FL  
Daniel Winkel, MD, Atlanta, GA  
Jessica Winslow, M.D., Brunswick, OH  
Gregory Alan Worrell, M.D., Rochester, MN  
Ahmed Moh'd Abdel Latif Yassin, M.B.B.S., Galveston, TX  
June Yoshii-Contreras, M.D., San Francisco, CA  
James Jacob Young, M.D., New York, NY  
Wendy Waldman Zadeh, M.D., Ankeny, IA  
Muhammad Asif Ali Zaidi, M.D., Moseley, VA  
George Martin Zinkhan, M.D., Salt Lake City, UT  
Jennifer Zurosky, M.D., Charlotte, NC

### **FP Cert**

Arin Abnoosian, M.D., La Crescenta, CA  
Syed Khalid Abubaker, M.B.B.S., Las Vegas, NV  
Uchenna Achebe, M.D., Ellicott City, MD  
Abiola Oladapo Adelaja, M.D., Rochester, NY  
Fahad Ali, M.D., Bryn Mawr, PA  
Jennifer Alleyne, M.D., Columbia, SC  
Santiago Alberto Almanzar Disla, M.D., New Castle, PA  
Lance Amols, M.D., Fort Lauderdale, FL  
Kiana Ann Andrew, M.D., New Orleans, LA  
Cara Angelotta, M.D., Chicago, IL  
Aili Wu Arias, M.D., Redlands, CA  
James Alden Armontrout, M.D., Mountain View, CA

Lucas Paul Bachmann, M.D., shakopee, MN  
Dalia Balsamo, M.D., Newport Beach, CA  
Alexis Beattie, M.D., New York, NY  
Michelle Benitez Cabrera, M.D., Miami Lakes, FL  
Alexander Berger, D.O., New York, NY  
John Michael Bonetti, D.O., Unionville, CT  
Sean Bordelon, M.D., Chicago, IL  
Sara Jeanne Brady, M.D., Brookline, MA  
Paul Abbott Bryant, M.D., San Francisco, CA  
Clayton Matthew Bullock, M.D., Ph.D., San Francisco, CA  
Luigi Cardella, M.D., Brentwood, TN  
Regina Maria Carney, M.D., Miami Beach, FL  
Bridget Casey-Leavell, DO, Cincinnati, OH  
Catherine Cashman, D.O., New Orleans, LA  
Jorge Ernesto Castillo, M.D., Haworth, NJ  
Eric Chan, M.D., San Francisco, CA  
Joshua Kora Chandy, D.O., Tampa, FL  
Mark Chapman, M.D., Chicago, IL  
Ryan Chiarella, D.O., Nashville, TN  
Kelly Lynn Coffman, M.D., Roswell, GA  
Dan Nicolae Cotoman, M.D., Charlotte, NC  
Folabo Yetunde Dare, D.O., Grand Rapids, MI  
Vivek Datta, M.B.B.S., San Francisco, CA  
Megan Patricia Della Selva, M.D., Baltimore, MD  
Charletta Ann Dennis, M.D., Detroit, MI  
Robert Eaton, M.D., Gainesville, FL  
Jeffrey Curtis Eisen, M.D., Portland, OR  
George Elias, M.D., Los Angeles, CA  
Ashleigh Fleming, M.D., Gonzales, LA  
Sarah Ann Flynn, M.D., Sioux Falls, SD  
Alaric Donham Frazier, M.D., FAIRFIELD, CA

Anthony Patrick Gale, M.D., Whiteman AFB, MO  
Jason Lerand Gandy, M.D., Columbia, SC  
Tiffany Gartrell, M.D., Dunwoody, GA  
Richard Cecil Geary III, M.D., Bellevue, WA  
Scott Alan Gershan, M.D., Evanston, IL  
Patrick Henry Gibbons, M.D., Rochester, NY  
Benjamin Goldberg, M.D., Napa, CA  
Benjamin Goldstein, M.D., Santa Rosa, CA  
Viral Goradia, M.B.B.S., East Amherst, NY  
Dorothy Gotlib, M.D., Ann Arbor, MI  
Lubna Grewal, M.D., Denver, CO  
Sandeep Gude, M.D., Collierville, TN  
James Gusfa, D.O., West Hartford, CT  
Oliver Louis Harper, M.D., New York, NY  
Melissa Heffler, M.D., Buffalo, NY  
Brian Holoyda, M.D., St. Louis, MO  
Samuel Jordan House, M.D., Sherwood, AR  
Gagandeep Singh Jattana, M.D., Pittsford, NY  
Roger Gee Joe, M.D., Houston, TX  
Janet Elaine Johnson, M.D., New Orleans, LA  
Kahlil Ali Johnson, M.D., Laurel, MD  
Robert Scott Johnson, M.D., San Francisco, CA  
Michelle Therssen Joy, M.D., Philadelphia, PA  
Rebecca Marie Karns, D.O., Wyoming, OH  
Jennifer Lynn Kemper, M.D., Cary, NC  
Talene Keshishian, M.D., Tujunga, CA  
Aruna Khilanani, M.D., New York, NY  
Felicitas Koster, D.O., Phoenix, AZ  
Matthew Kruse, M.D., Anoka, MN  
Kimberly Daehler Kulp-Osterland, D.O., Ann Arbor, MI  
Sanaz Kumar, M.D., Rockville, MD

Matthew Peter Lahaie, M.D., Boston, MA  
Jacqueline Landess, M.D., St Louis, MO  
Samuel Libeu, M.D., Chicago, IL  
Benjamin Lowenburg, M.D., New Orleans, LA  
Azalia Veronica Martinez, M.D., San Antonio, TX  
Mikel Matto, M.D., San Francisco, CA  
Robert Carl McKenzie Jr., D.O., APO, AE  
Nathaniel Mendelsohn, M.D., Mountain View, CA  
Ashish V. Meshram, M.D., New York, NY  
Katherine Michaelson, M.D., Seattle, WA  
Douglas Misquitta, M.D., Columbus, OH  
Brandon Gordon Moore, M.D., Canton, MI  
Scott Campbell Moran, M.D., Silver Spring, MD  
Mustafa Ali Mufti, M.B.B.S., Newark, DE  
Brianna Arrington Newhouse, M.D., Farmington Hills, MI  
Ijeoma Jennifer Njoku, M.D., Jersey City, NJ  
Ziyad Bahij Nuwayhid, M.D., Los Angeles, CA  
Joseph Otonichar, D.O., New York, NY  
Jason Dean Ourada, M.D., Omaha, NE  
Kathleen Mary Patchan, M.D., Baltimore, MD  
Priyanka Arvind Patel, M.D., Lilburn, GA  
Satya Sesha Sai Varma Penumetcha, M.D., Wilsonville, OR  
George L. Petzinger, M.D., Selah, WA  
Matthew D Pitcher, D.O., Heber City, UT  
Jennifer Ellen Platt, D.O., Cedar Grove, NJ  
Sana Saeed Qureshi, M.D., Miami, FL  
Leena Rajagopal, M.B.B.S., Edgewater, NJ  
Sundeep Singh Randhawa, M.D., Chicago, IL  
Suchet Rao, M.B.B.S., New York, NY  
Simha Esther Ravven, M.D., Putney, VT

Thomas Recore, M.D., Madison, MS  
Wilhem Rivera, M.D., Camden, NJ  
Carlos Salgado, M.D., Miami, FL  
Joshua Sanderson, M.D., New Orleans, LA  
Smink Sangsura, M.D., Shreveport, LA  
Douglas Saphier, M.D., Englewood, NJ  
Shree Nitya Sarathy, M.D., Menifee, CA  
Victor Sherrel, M.D., Pensacola, FL  
Swati Shivale, M.D., New York, NY  
Rafik Shawki Badie Sidaros, M.B.Ch.B., New Haven, CT  
Navneet K Sidhu, M.D., Alexandria, VA  
Eugene Foris Simopoulos, M.D., Staunton, VA  
Kanishk Solanki, M.D., New York, NY  
Amanda Square, M.D., Ellicott City, MD  
Diane St. Fleur, M.D., Syracuse, NY  
Lauren Molly Stossel, M.D., New York, NY  
Bentley Strockbine, M.D., Windsor, CT  
Jonathan Stuart Thiele, M.D., Aurora, CO  
Celeste Erika Valencia, M.D., New Haven, CT  
Deepti Vats, M.B.B.S., Rockwall, TX  
Sundeep Viridi, M.D., Philadelphia, PA  
Kyle Christopher Walker, MD, Boston, MA  
Scott Walmer, D.O., Pueblo, CO  
LaKeisha S. Watson, M.D., Charlotte, NC  
DeJuan Tarrell White, M.D., Atlanta, GA  
Patrick George Wiita, M.D., West Hollywood, CA  
Lindsey Ann Wilbanks, M.D., North Little Rock, AR  
Chong Yang, D.O., Napa, CA

## **FP MOC**

Bhushan Shreeram Agharkar, M.D., Brookhaven, GA

Corinne Judith Belsky, M.D., Evanston, IL  
Robert H. Berger, M.D., Westport, CT  
Emily Jane Doyle, M.D., Austin, TX  
Todd S. Elwyn, M.D., San Luis Obispo, CA  
Melissa Gail Inga Eshelman, M.D., Austin, TX  
Daniel James Feeney, M.D., Shreveport, LA  
Elizabeth Boughton Ford, M.D., Dobbs Ferry, NY  
Robert Paul Forrest, M.D., North Little Rock, AR  
Susan Michelle Garriga, M.D., Jackson, LA  
Gail Marie Hellmann, M.D., Cincinnati, OH  
Katherine Ann Jacoby, M.D., Clarkson, KY  
David Eddis Johnson, M.D., Kensington, MD  
Beth Amelia Judge, M.D., San Diego, CA  
Kavita Khajuria, M.D., Santa Monica, CA  
Mark Edward Kremen, M.D., Omaha, NE  
Camille Aimee LaCroix, M.D., Boise, ID  
Christopher Lee Lange, M.D., Clarksville, TN  
Li-Wen Grace Lee, M.D., New York, NY  
Charles William Luther, M.D., Middleburg Heights, OH  
Ramon O. Martinez, M.D., Orlando, FL  
Raymond Klein Molden, M.D., Little Rock, AR  
Anil Choudary Nalluri, M.D., Canfield, OH  
Elena Carmen Nichita, M.D., Manlius, NY  
Bradley Jay Novak, M.D., Belmont, CA  
Elizabeth F. Pribor, M.D., Saint Louis, MO  
Leon Ravin, M.D., Las Vegas, NV  
Alan Jay Ravitz, M.D., New York, NY  
William Howard Reid, M.D., Horseshoe Bay, TX  
Danielle Renee Robinson, M.D., Silver Spring, MD  
Aisha Sabir, M.D., Vienna, VA  
Esperanza Yvette Salinas, M.D., Chicago, IL

Scott Michael Soloway, M.D., Brooklyn, NY  
Maria Ruiz Sweeney, M.D., San Antonio, TX  
Jason Scott Thomas, M.D., Rancho Cucamonga, CA  
Jorge Julian Villalba, M.D., Thonotosassa, FL  
Rodney Anthony Villanueva, M.D., Charlotte, NC  
Michael Mark Welner, M.D., New York, NY  
Alton Williams, M.D., J.D., Durham, NC  
Karen Sondra Wiviott, M.D., Chicago, IL  
Dean Michael De Crisce, M.D., Elizabeth, NJ  
Graham Lindley Spruiell, M.D., Mandeville, LA

### **GP MOC**

Anoushirvan Adel, M.D., Peterborough, ON  
Edward Clark Allen, M.D., Del Mar, CA  
Joseph Leonard Antonowicz, M.D., Altoona, PA  
Byron Dee Bair, M.D., Centerville, UT  
Peter John Clagnaz, M.D., Jacksonville, FL  
Joseph Paul D'Afflitti, M.D., Waban, MA  
John K. Darby, M.D., Fremont, CA  
Gayathri Dasharathy, M.D., Edmond, OK  
James Michael Ellison, M.D., Belmont, MA  
Denise Rae Evans, M.D., Augusta, GA  
Jeffrey Robert Friedman, M.D., Newton, MA  
Michael Hernandez, M.D., Whittier, CA  
Amilda Knox Horne, M.D., Durham, NC  
William Julio, M.D., Bayamon, PR  
Eliot Fredric Kaplan, M.D., Turnersville, NJ  
Lawrence Yibin Liang, M.D., New York, NY  
JoAnne McManus Markle, M.D., Mountain View, CA  
William Maffitt McDonald, M.D., Atlanta, GA  
David Naimark, M.D., Cardiff, CA

Olivia Ifeoma Okereke, M.D., M.S., Belmont, MA  
Enrique Perez, M.D., Roanoke, VA  
Stephen Louis Pinals, M.D., Ann Arbor, MI  
Alina Rahel Rais, M.D., Sylvania, OH  
Marsha Heather Rosenberg, M.D., Toronto, ON  
Michael Joel Schrift, D.O., Glencoe, IL  
Jerome John Schulte Jr., M.D., Wilmington, OH  
Elias Karim Shaya, M.D., Lutherville, MD  
Peggy Sue Stephens, M.D., Sellersburg, IN  
Lee Stevens, M.D., Shreveport, LA  
Mugdha Ekanath Thakur, M.D., Chapel Hill, NC  
David Ball Trinkle, M.D., Roanoke, VA  
Corina M. Velehorschi, M.D., Windsor, ON  
Kenneth Paul von der Porten, M.D., Ph.D., Pittsburgh, PA  
Meredith Clark Walgren, M.D., Ph.D., Nashville, TN  
Bruce Matthew Weeks, M.D., Juneau, AK  
Andrew Charles Bott, M.D., Brookline, MA

### **Psych Cert**

Alexandra Aaronson, M.D., Chicago, IL  
Galia Regina Abadi, MD, Denver, CO  
Aliana Michelle Abascal, M.D., Grafton, WV  
Pilar Abascal, M.D., Lafayette, CA  
Elham Fatima Abbas, M.B.B.S., Lenexa, KS  
Jessica Abellard, M.D., New Haven, CT  
Mayra Alexandra Abelleira Martinez, M.D., Guaynabo, PR  
Margarita Emile Abi Zeid Daou, M.D., Worcester, MA  
Lila Aboueid, D.O., Paramus, NJ  
Shiby Abraham, M.D., Jericho, NY  
Gil Abramovici, M.D., Fort Lauderdale, FL

Andres Abreu, M.D., Portland, ME

Rami Abukamil, M.D., Cincinnati, OH

Vyoma A Acharya, M.B.B.S., Brighton, MA

Jadiyer Olga Acosta, M.D., Miami, FL

Nyssa Adackapara, M.D., Rolling Hills Estates, CA

Akuh Adaji, M.B.B.S., Rochester, MN

Tiy Leilani Adams, M.D., Philadelphia, PA

Dorcas Adaramola, M.B.B.S., Springfield, IL

Alexander Adelsberger, D.O., Philadelphia, PA

Solomon Judah Adelsky, M.D., Cambridge, MA

Lalleh Fatimeh Adhami, M.D., Huntsville, AL

Quratulain Agha, M.D., Huntsville, AL

Shilpa Agraharkar, M.D., New York, NY

Anjum Shoaib Ahmed, M.D., Tuckahoe, NY

Jayme Ahmed, M.D., Indianapolis, IN

Afiah Ahsan, M.B.B.S., Sayreville, NJ

Aakash Mohan Ahuja, M.D., SANTA CLARITA, CA

Julia R Ailabouni, M.D., Richland, MI

Aspen Macey Ainsworth, M.D., Rochester, NY

Asra Ali Akber, M.D., Jericho, NY

Rami Al-Sumairi, M.B.B.CH, Malden, MA

Miguel Alampay, M.D., Bethesda, MD

Feras Abdullah AlAwad, M.D., Homestead, PA

Cory Alfery, DO, McLean, VA

Lujain Alhajji, M.B.Ch.B., miami, FL

Amina Zahra Ali, M.D., New York, NY

Farah Ali, M.D., Frisco, TX

Faria Chudhri Ali, D.O., League City, TX

Nargis Ali, M.D., GEORGETOWN, TX

Zehra Mirza Ali, M.D., Staten Island, NY

William Almodovar-Sanchez, M.D., Ponce, PR

Christopher Aloeos, M.D., Bronx, NY

Camille Alvarado, D.O., Portland, CT

Ryan Alvares, M.D., New Orleans, LA

Hernan Enrique Alvarez, M.D., Las Cruces, NM

Jose Alfredo Alvarez, M.D., Miami, FL

Wayel Alyahya, M.B.B.S., Revere, MA

Hamid Reza Amanatkar, M.D., St. Louis, MO

Andrea E Ament, M.D., Redwood City, CA

Ritesh Amin, M.D., Piscataway, NJ

Ellen Amrock, M.D., Birmingham, AL

Valeria Karina Anaya, M.D., South Pasadena, CA

Aaron Andersen, D.O., Silver Spring, MD

Laura Elizabeth Andersen, M.D., Ann Arbor, MI

Alan Anderson, D.O., Gilbert, AZ

Lauren Ann Anderson, M.D., San Diego, CA

Tomeika Rashel Anderson, D.O., Indianapolis, IN

Yohanis Leonor Anglero Diaz, M.D., Providence, RI

Ali Syed Anwar, D.O., Saint Louis, MO

Elie Gerges Aoun, M.D., New York, NY

Anjum Ara, M.B.B.S., Martinez, GA

Shadi Aramesh, M.D., New York, NY

Alan Xavier Arauz, M.D., Huntersville, NC

Christopher Michael Archangeli, M.D., South Burlington, VT

Reena Ardeshta, M.D., Baltimore, MD

Sushrusha Arjyal, M.B.B.S., Cary, NC

Francis Peter Armendariz, M.D., Lawton, OK

Stephanie Armstrong, M.D., Seattle, WA

Arun Arora, M.D., Everett, WA

Siddharth Singh Arora, D.O., Palm Bay, FL

Jose Alberto Arriola Vigo, M.D., Nashville, TN

Olubunmi Obiri Asana, M.D., New York, NY  
Ayesha Kader Ashai, M.D., Sacramento, CA  
Hera Ashfaq, D.O., New Haven, CT  
Sara Ashurst, M.D., Chicago, IL  
Jesse Jack Astwood, M.D., NYC, NY  
Hani Michael Atallah, M.D., San Diego, CA  
Bem Atim, M.D., Long Island City, NY  
Joshua J. Atkinson, M.D., San Antonio, TX  
Aparna Atluru, M.D., Stanford, CA  
Rubin Aujla, M.D., New Orleans, LA  
Elizabeth Ault, M.D., Baton Rouge, LA  
Allison Autrey, M.D., st paul, MN  
Mabel Avilas, M.D., Chicago, IL  
Daniel Oluwaseun Ayanga, M.B.B.S., Houston, TX  
Derek Ayers, D.O., Advance, NC  
Paola Ayora, M.D., Darien, CT  
Zahida Tasneem Azam, M.D., Edmond, OK  
Vidushi Babber, M.D., Daytona Beach, FL  
Iqnoor Bains, M.B.B.S., Houston, TX  
Matej Bajzer, M.D., St. Paul, MN  
Nicole Claire Baker, M.D., Dayton, OH  
Manjunath Balaram, M.B.B.S., Corpus Christi, TX  
Nisha Baliga, M.D., Lebanon, NH  
Olusinmi Bamgbose, M.D., San Francisco, CA  
Bolaji A Bankole, M.D., Linfield, PA  
Anita Bansal, M.D., Grand Forks, ND  
Lauren Baras, M.D., Charleston, SC  
Eric Max Barker, M.D., Logan, UT  
Laura Barket, D.O., Phoenix, AZ  
Nicholas Reese Barnes, M.D., Boston, MA  
Brian Scott Barnett, M.D., Brighton, MA

Yvonne Marie Barnett, M.D., Boston, MA  
Mariame Barry, M.D., Downingtown, PA  
Mandeep Singh Bath, M.B.B.S., Richmond Hill, NY  
Suchita Batwara, M.B.B.S., Baltimore, MD  
Rebecca Bauer, M.D., Milwaukee, WI  
Maryrose Patricia Bauschka, M.D., Salt Lake City, UT  
Rakel Chandra Beall-Wilkins, M.D., Sugar Land, TX  
Kara Keuthan Beatty, M.D., Midlothian, VA  
Alexa Beilharz, M.D., Durham, NC  
Marianne Bernadino, M.D., Duluth, MN  
Joel Asher Bernanke, M.D., Brooklyn, NY  
Hannah Karine Betcher, M.D., Rochester, MN  
Joanna Beyer, D.O., Philadelphia, PA  
Hiren Bhakta, M.D., New York, NY  
Ish Bhalla, M.D., New Haven, CT  
Amit Bhardwaj, M.D., Charleston, SC  
Saurabh B Bhardwaj, M.B.B.S., Chicago, IL  
Rajiv Bhatia, D.O., White Plains, NY  
Sayanti Bhattacharya, M.B.B.S., Durham, NC  
Kalpesh Bhikhalal Bhavsar, M.B.B.S., Claremont, CA  
Maninder Bhutani, M.B.B.S., Sacramento, CA  
Ewa Dziergas Bieber, M.D., Rochester, MN  
Joseph John Biedrzycki, D.O., Liverpool, NY  
Adam Biesman, D.O., Abilene, TX  
Rajeev Singh Billing, M.D., Atlanta, GA  
Kelly Anne Bisel, D.O., Kansas City, KS  
Melvina Deneal Bissonette, M.D., Minneapolis, MN  
Hubert Piotr Bitner, MD, Atlanta, GA  
Christopher Kynrint Blazes, M.D., San Francisco, CA  
Kira Marie Bleecher, M.D., Cromwell, CT  
Derek Blevins, M.D., New York, NY

Elizabeth Anne Block, M.D., Ann Arbor, MI  
Suzanne Elizabeth Bloore, M.D., Cincinnati, OH  
Monica Blumenkrantz, M.D., Indianapolis, IN  
Sailatha Bobba, M.B.B.S., Glen Allen, VA  
Joshua Boguch, M.D., Madison, WI  
Emeric Bojarski, M.D., Carlisle, MA  
Syed Ali Imran Bokhari, M.D., Schaumburg, IL  
Cameron Richard Bonney, M.D., Scarborough, ME  
Mariya Borodyanskaya, D.O., Lakewood, OH  
Rebecca LeAnn Bottom, M.D., Indianapolis, IN  
David Richard Bowman, M.D., Lexington, SC  
Lisa Boyars, M.D., Charleston, SC  
Brittney Boykin, M.D., Cranston, RI  
Ellen Bradley, M.D., San Francisco, CA  
Margot Antonieta Brandi, M.D., Loveland, OH  
Claire Brandon, M.D., New York, NY  
Mariko Diann Brandon, M.D., Saint Petersburg, FL  
Meredith Brandon, M.D., West Orange, NJ  
Gregory John Bredow, M.D., York, PA  
Eugenia Brikker, M.D., Louisville, KY  
Olga Briklin, M.D., Bronx, NY  
Brendon Douglas Brockmann, M.D., Orange, CA  
Magdalena Justyna Broszko, MD, Rochester, NY  
Adam Christopher Brown, M.D., Joliet, IL  
Angela Maria Brown, M.D., Warner Robins, GA  
Aquanette Brown, M.D., Washington, DC  
Donald Rashad Brown II, M.D., Los Angeles, CA  
Kurt Anthony Brown, M.D., Washington, DC  
Nathaniel Abram Brown, M.D., Encinitas, CA  
Samantha Elizabeth Brown, M.D., Seguin, TX  
Neil Bruce, M.D., New York, NY

Eric Brueckner, D.O., New Haven, CT  
Kwame Buabeng, M.D., San Diego, CA  
Lauren Noele Buchheim, M.D., Scarborough, ME  
Andrew Christian Buchholz, D.O., Rockville, MD  
Christian Andrew Buhr, M.D., Minneapolis, MN  
Tu Le Tuan Bui, M.D., Oklahoma City, OK  
Geranameo Vladimir Bullock, M.D., Williamsburg, VA  
Jennifer Bundrick, M.D., Littleton, CO  
Abigail Galle Buoy, M.D., Springfield, IL  
Susan Buratto, M.D., Chicago, IL  
Elizabeth Burguieres, M.D., Charleston, SC  
Judy Renee Burke, MD, New York, NY  
Heidi G Burns, M.D., Ypsilanti, MI  
Taylor Burns, M.D., Nashville, TN  
Allison Butt, D.O., Birmingham, AL  
Michael Byrne, M.D., Providence, RI  
Alice Caesar, M.D., White Plains, NY  
Drew W Calhoun, M.D., Beachwood, OH  
Megan Elizabeth Campbell, D.O., New Orleans, LA  
Anthony Cannon, M.D., Chicago, IL  
Katie Cannon, M.D., Verona, WI  
William Russell Cannon, M.D., Raleigh, NC  
Tiffany Yan Cao, M.D., Brooklyn, NY  
Svetlana Caragheaur, MD, Lemoore, CA  
Joseph A Carley, M.D., Birmingham, AL  
Andrew David Carlo, M.D., Seattle, WA  
Jason M. Carness, M.D., Verona, NJ  
Freddy Jose Carreras Alvarado, M.D., Sherman Oaks, CA  
Aaron K Carson, M.D., Springdale, AR  
John M Casey, M.D., Little Rock, AR  
Maria Lourdes Castineira Garcia, M.D., Chevy Chase, MD



Julio Cesar Castro Gayol, M.D., North Miami, FL  
 Fabio Catao Alves Martins Da Silva, M.D., Weston, WI  
 Caitlin Alexis Caveney, M.D., Morgantown, WV  
 Gina Cavorsi, M.D., Reading, PA  
 Basar Cenik, M.D., Dallas, TX  
 Naji Chaaya Salloum, M.D., Boston, MA  
 Vamsee Chaguturu, M.D., Piscataway, NJ  
 Alanna Chait, M.D., New York, NY  
 Bandhan Chakraborty, M.D., Glen Allen, VA  
 Katie Marie Chambers, M.D., Lexington, SC  
 Clarice Chan, M.D., Bellerose, NY  
 Selena Chan, D.O., San Francisco, CA  
 Tiffany Chan, M.D., Mountain View, CA  
 Alex James Chandler, M.D., Roslyn, NY  
 Seetha Chandrasekhara, M.D., Philadelphia, PA  
 Anita Kumar Chang, D.O., San Mateo, CA  
 Laura Schieffer Chang, D.O., Chicago, IL  
 Serena Chang, M.D., New York, NY  
 Wei-Li Chang, M.D., New York, NY  
 Christine Grace Charles, M.D., Houston, TX  
 Wilsa Charles Malveaux, M.D., Sherwood Forest, CA  
 Humera Chaudhary, M.D., New York, NY  
 Neha Chaudhary, M.D., Irving, TX  
 Simriti Chaudhry, M.D., Chester, NY  
 Kristina Chechotka, M.D., New York, NY  
 Chris Chen, M.D., Los Angeles, CA  
 Tingfang (Tina) Chen, M.D., LANSDALE, PA  
 Duncan Cheng, M.D., New York, NY  
 Johnnie Chi, D.O., Montebello, CA  
 Ming Bruce Chi, M.D., Kansas City, MO  
 Bhupinder Kaur Chima, M.D., Lincoln, CA  
 Stephen Ching, D.O., Grandview, OH  
 James Chiu, M.D., Sioux Falls, SD  
 Lok-Ting Lawrence Chiu, M.D., Houston, TX  
 Jason Y Cho, M.D., Durham, NC  
 Stephanie Hyun Cho, M.D., Burbank, CA  
 Youngsun Cho, M.D., New Haven, CT  
 Nahil Chohan, M.D., Decatur, GA  
 David Chong, M.D., Phoenix, AZ  
 Yon Chong, M.D., Omaha, NE  
 Nitin Chopra, M.D., Mississauga, ON  
 Jason Marc Chorowski, M.D., Long Beach, NY  
 Jigar Kishorbhai Chotalia, M.B.B.S., Denver, CO  
 Kevin Dawen Chou, M.D., New York, NY  
 Wilson Chung, D.O., New York, NY  
 Caroline Clark, M.D., Bethesda, MD  
 Michael Allen Clark, M.D., Oxnard, CA  
 Elle Sowa Cleaves, M.D., Trenton, NJ  
 David H Clements, M.D., Philadelphia, PA  
 Ginger Clifton, M.D., Little Rock, AR  
 William Cohen, M.D., Washington, DC  
 Jessica L Coker, M.D., Little Rock, AR  
 Mary Colavita, M.D., Short Hills, NJ  
 John Coleman, M.D., Plano, TX  
 Julia Heath Coleman, M.D., Arlington, MA  
 Taren Coley, M.D., Durham, NC  
 Maria Collado, M.D., Miami, FL  
 Heidi Collins, M.D., Sacramento, CA  
 Liane Caryl Colsky, M.D., Encino, CA  
 Kory Combs, M.D., Oakland, CA  
 Suki Conrad, M.D., Tigard, OR  
 Amy Corcoran, M.D., Chicago, IL

Tianyuan Yin Cornell, M.D., Wildwood, MO  
Theresa Lynne Costales, M.D., Seattle, WA  
Kevin Coughlin, M.D., Somerville, MA  
Kurt L Cousins, M.D., Austin, TX  
Laura Elizabeth Craig, M.D., Chicago, IL  
Colby Croft, M.D., San Francisco, CA  
Stephanie Alexis Cross, M.D., Philadelphia, PA  
Rachel Crothers, M.D., El Cerrito, CA  
Aaron J Crum, M.D., Denver, CO  
Anthony Marc Cruz, D.O., Twentynine Palms, CA  
Christina Cruz, M.D., Chapel Hill, NC  
Miles Gregory Cunningham, M.D., Ph.D., Belmont, MA  
Ashley Beth Curry, M.D., Lakewood, CO  
Amy Curtis, M.D., Seattle, WA  
Kali Cyrus, M.D., New Haven, CT, CT  
Christopher Czapl, M.D., Oklahoma City, OK  
Douglas D'Agati, M.D., Baltimore, MD  
Iunia Alexandra Dadarlat, M.D., San Francisco, CA  
Amar Kirti Dadwal, M.B.B.S., Oklahoma City, OK  
Monica Lynn Daigle, D.O., Lewiston, ME  
David Nicholas Daniels, M.D., Bethesda, MD  
Trisa Marie Danz, M.D., Waimanalo, HI  
William Connor Darby, M.D., Los Angeles, CA  
Beth Darling, D.O., Mesa, AZ  
Indrany Datta-Barua, M.D., Chicago, IL  
Shalini Darshana Dave, D.O., Philadelphia, PA  
Ashley Dawn Davidson, M.D., Seattle, WA  
Belen Davila, M.D., Brawley, CA  
Ebony Davis, M.D., New York, NY  
Jeffrey William Davis, M.D., Houston, TX  
Maeghan Alisha Davis, M.D., New Orleans, LA

Daniel Dawis, D.O., Cottonwood Heights, UT  
Nicole Albrecht Dawis, M.D., Cottonwood Heights, UT  
Nina de Lacy, M.D., Seattle, WA  
Angelo De Los Angeles, M.D., Farmington, CT  
John Anderson De Mott, D.O., Cleveland Heights, OH  
Ralph Hemerson de Similien, M.D., Hamden, CT  
Michele De Souza Morais, M.B.B.S., Chicago, IL  
Krishni De Thabrew, M.D., Glen Rock, NJ  
Christopher Debernard, M.D., Fayetteville, AR  
Elizabeth DeGrush, M.D., Natick, MA  
Valentina Sara Dehghan-Bernabe, M.D., Chicago, IL  
Milania Dela Cruz, M.D., WEST HAVEN, CT  
Christopher B. DeLange, M.D., Springfield, VA  
Vittoria DeLucia, M.D., Baltimore, MD  
Thomas Denton Demark, M.D., Lees Summit, MO  
Michelle Marie DeNault, M.D., Denver, CO  
Michael C Dennis, M.D., Maumelle, AR  
Prital Janakbhai Desai, M.B.B.S., Charlottesville, VA  
Joseph Charlton DesRosier, M.D., Blaine, MN  
Cindy Devassy, M.D., Dearborn, MI  
Arashinder Dhaliwal, M.B.B.S., stamford, CT  
Niyati Dhand, M.D., East Haven, CT  
Anjali Dhanda, M.D., Germantown, MD  
Gagandeep Dhillon, M.B.B.S., Fresno, CA  
Tiffany Melissa Diament, M.D., Porter Ranch, CA  
Eva Diaz, M.D., Denver, CO  
Yahaira Noemi Diaz Rodriguez, M.D., Bayamon, PR  
Katharine Jane Dinwiddie, D.O., Dallas, TX  
Dustin Robert Dippen, M.D., Minocqua, WI  
Swati Divakarla, M.D., Baltimore, MD  
Andrew The-An Do, M.D., Sherman Oaks, CA

Bobbie Jo Dodson, D.O., Denver, CO  
 Colleen Donovan, M.D., Saint Louis, MO  
 Erin Dooley, M.D., New Haven, CT  
 Jennifer Leigh Downs, M.D., Indianapolis, IN  
 Jonathon L Dozeman, D.O., Wyoming, MI  
 Roberta Dracxler Meaker, M.D., Millburn, NJ  
 Alexandr Dron, M.D., Beachwood, OH  
 Joseph Charles Drumm, D.O., Monticello, AR  
 Jean Caroline DSouza, M.B.B.S., Rockville, MD  
 Sutapa Dube, M.D., Tucson, AZ  
 Kari DuBosque, M.D., Louisville, KY  
 Neeta Sarla Duggal, M.D., New York, NY  
 Alison M Duncan, M.D., East Providence, RI  
 Izabella Dutra de Abreu, M.D., Dallas, TX  
 Amy Louise Earshen, MD, Albany, NY  
 Daniel Joseph Eckroth, M.D., New York, NY  
 Onoriode Sylvester Edeh, M.D., North Ridgeville, OH  
 Andrew Edelstein, M.D., New York, NY  
 Meghan Kathleen Edmundson, M.D., Chicago, IL  
 Lauren Christine Edwards, M.D., Omaha, NE  
 Yamanda Mack Edwards, M.D., Cypress, CA  
 Jodi Elene Eipper-Mains, M.D., Ph.D., Brighton, MA  
 Anthony Ekwo, M.B.B.S., ANTIOCH, TN  
 Rasha M El Kady, M.D., Columbia, MO  
 Keely T Elgethun, M.D., Oak Park, IL  
 Misty Dawn Eliason, M.D., Hibbing, MN  
 William Troy Elkington, M.D., Dothan, AL  
 Jessica Rachel Ellinoy, M.D., San Francisco, CA  
 Mark Elliott, M.D., San Francisco, CA  
 Stacey Patricia Elliott-Stoffle, D.O., Liverpool, NY  
 Ashley Ellison, M.D., New Orleans, LA  
 Joel Ellison, M.D., Cincinnati, OH  
 Sarah Elmi, M.D., Brooklyn, NY  
 Jason Emejuru, M.D., Baltimore, MD  
 Kelechi Nnamdi Emereonye, M.B.B.S., Kenner, LA  
 Reiko Joy Emtman, M.D., Cambridge, MA  
 Caitlin Engelhard, M.D., Baltimore, MD  
 Zachary Engler, M.D., Providence, RI  
 Lindsey Enoch, M.D., Seattle, WA  
 Edward Joseph Erbe, M.D., Missoula, MT  
 Stephen Erlach, M.D., Oakwood, OH  
 Oscar J. Escano, M.D., Colorado Springs, CO  
 Suzanne Kohout Eschenbach, M.D., Brooklyn, NY  
 Katrina Cecilia Osin Escuro, M.D., Beltsville, MD  
 Daniel Eskenazi, M.D., Brooklyn, NY  
 Zelde Espinel, M.D., Sunny Isles Beach, FL  
 Brigitte Gysell Espinoza Ugaz, M.D., Wausau, WI  
 Hadi Estakhri, M.D., Newport Beach, CA  
 Narissa Etwaroo, M.D., Tampa, FL  
 Abbie Martha Ewell, M.D., Dallas, TX  
 Sylvia Agnes Jacobs Exum, M.D., Nashville, TN  
 Denise Fabian, M.D., Tucson, AZ  
 Travis Fahrenkamp, M.D., Saint Paul, MN  
 Karina Fajardo, M.D., Miami Springs, FL  
 Blessing Falola, M.B.B.S., Trussville, AL  
 Pantea Farahmand, M.D., New York, NY  
 Pouria Farhoomandi, M.D., Carle Place, NY  
 Michael Saul Farris, M.D., Portland, OR  
 Zeeshan Faruqui, M.B.B.S., Washington, WV  
 Rachel Lynn Faust, M.D., Juniata, NE  
 Olajide Fawehinmi, M.B.Ch.B., Avondale Estates, GA  
 Irina Faynblut, M.D., Lawrence, NY

Semyon Faynboym, M.D., Fort Wayne, IN

Leah Fegan, M.D., Seattle, WA

Jacob Feigal, M.D., Durham, NC

Victoria Isabel Felkl, M.D., Torrance, CA

Yun Feng, M.D., New Haven, CT

Jeannette Ferguson, M.D., Albuquerque, NM

Dara Victoria Fernandez, M.D., Forest Hills, NY

Daphne Collado Ferrer, M.D., Cleveland, OH

Gerardo Francisco Ferrer, M.D., Miami, FL

Frank A Fetterolf, M.D., Pittsburgh, PA

Alice Elizabeth Fields, M.D., Lovettsville, VA

Patricia Hansen Figgs, M.D., Middletown, DE

Fayola Dara Fils-Aime, M.D., Hyattsville, MD

Victoria Gene Fink, M.D., Syosset, NY

Daniel Moran Fischer, M.D., Portland, OR

Daniel O Fishman, M.D., Pittsburgh, PA

Joshua B. Fitzgerald, M.D., Reno, NV

Joshua Mark Flatow, M.D., Torrance, CA

Emily Flier, M.D., Watertown, MA

Inti Flores, M.D., San Francisco, CA

Ludwing Alexis Florez Salamanca, M.D., Astoria, NY

Jonathan Ryan Floriani, M.D., Las Vegas, NV

Theresa Margaret Flynn, M.D., Phoenix, NY

Adam Fogel, D.O., Mineola, NY

Megan Fojtik, D.O., Detroit, MI

Peolia Kansas Fonsworth III, M.D., Los Angeles, CA

Kara Mekel Foster, M.D., Tulsa, OK

Elizabeth Wolf Fourcade, M.D., Pittsburgh, PA

Henry Matthew Fourcade, M.D., Pittsburgh, PA

Patrice Ananie Eugene Fouron, D.O., Flushing, NY

Suhey Franco Cadet, M.D., Basking Ridge, NJ

Brent Frazee, M.D., Portland, OR

George Mark Freeman, M.D., Menlo Park, CA

Patricia Frey, D.O., High Bridge, NJ

Ran Friedman, M.D., Dallas, TX

Stephanie Friedman, M.D., New York, NY

Mary Gable, M.D., Los Angeles, CA

Pawel Andrej Galecki, M.D., Ypsilanti, MI

Constantine Alfred Galifianakis, M.D., Decatur, GA

Stephen John Gallant, M.D., Chelmsford, MA

Stephen H. Gamss, D.O., Brooklyn, NY

Michael Gandal, M.D., Los Angeles, CA

Jai Chetan Gandhi, M.D., Seattle, WA

Meredith Gansner, M.D., Watertown, MA

John Ganz, M.D., Charleston, SC

Rafael Ariel Garcia, M.D., Miramar, FL

April Lourdes Azarcon Garing, M.D., North Las Vegas, NV

Robert Garrard, M.D., Long Island City, NY

Bintou Gassama, M.D., WESLEY CHAPEL, FL

Laura I. Gavanescu, MD, Barrington, IL

David Gavito, M.D., League City, TX

Bethany Kay Gaylord, D.O., FPO, Okinawa

Jenilee April Mary Generalla, M.D., Harrisburg, PA

Kimberly Genesis, M.D., New Orleans, LA

Kaveh Cyrus Ghaedi, D.O., Piscataway, NJ

Musammar Ghani, D.O., Indianapolis, IN

Deepti Ghiya, M.D., Stony Brook, NY

Bardia Gholami, MD, Ypsilanti, MI

Sathi Ghosh, M.D., Staten Island, NY

Pamela Susan Giacalone, M.D., Brookline, MA

Sarah Gibbons, M.B.Ch.B., Cheektowaga, NY

Norriecce Gibson, M.D., Williamsburg, VA

Andrea Marie Giedinghagen, M.D., Saint Louis, MO  
 Sarabjit Singh Gill, M.D., Livermore, CA  
 Kelsey Leigh Gilles, M.D., Lauderdale, MN  
 Ronald Reagan Gilley II, M.D., Lebanon, NH  
 Whitney Talbott Gilley, M.D., Lebanon, NH  
 Megan Gilman, M.D., New York, NY  
 Mark Giordano, M.D., Fort Myers, FL  
 Oliver Glass, M.D., Atlanta, GA  
 Kristina Elizabeth Glover, D.O., Howell, MI  
 Samantha Gnanasegaram, M.D., Manchester, NH  
 Michael Goedde, M.D., Burlington, VT  
 Anurag Goel, M.B.B.S., San Francisco, CA  
 Jennifer Leah Goetz, M.D., Boston, MA  
 Diana Goia, M.D., Lakewood, CO  
 Kristine L. Goins, M.D., New Haven, CT  
 Lessie Eric Golden, M.D., Pittsburgh, PA  
 Jessica Goldhirsh, M.D., Philadelphia, PA  
 Aviva Beth Stein Goldman, M.D., M.P.H., Pikesville, MD  
 Milena Goldshmidt, M.D., White River Junction, VT  
 Luis Filipe Gomes Pereira, M.D., New York, NY  
 Laura Gabriela Gonzalez-Conty, M.D., New York, NY  
 Erica Good, M.D., Pittsburgh, PA  
 Ross Elliott Goodwin, M.D., Baltimore, MD  
 Margarita Gormus, M.D., Wayne, NJ  
 Robert Gorney, M.D., San Diego, CA  
 Khrisan Gosai, M.D., White River Junction, VT  
 Arpita Goswami Banerjee, MD, Philadelphia, PA  
 Neil Allen Gray, M.D., Kailua, HI  
 Sarah Grayce, M.D., Nashville, TN  
 Dina Ann Greco, D.O., Chester Springs, PA  
 Marcel Green, M.D., Astoria, NY  
 William Greene, M.D., Livermore, CA  
 Matthew Greve, M.D., Honolulu, HI  
 Tarandeep Grewal, M.D., Seattle, WA  
 LaTonya Griffin, M.D., Charlotte, NC  
 Qyana Kelly Griffith, M.D., Ellenwood, GA  
 Joshua Griffiths, M.D., Englewood, CO  
 Garic Grisbaum, M.D., Jefferson, LA  
 Melanie J Grubisha, M.D., Pittsburgh, PA  
 Jessica Grudzien, M.D., Gowanda, NY  
 David Seth Grunwald, M.D., Menlo Park, CA  
 Thomas Ryan Gspandl, D.O., Copley, OH  
 Phillip D Guajardo, M.D., Kentwood, MI  
 Christopher Guerrero, M.D., Chicago, IL  
 Iris V. Guerrero Urena, M.D., New York, NY  
 Marc Gunderson, M.D., University City, MO  
 Sushma Gunturu, M.B.B.S., Novi, MI  
 Saurabh Gupta, M.B.B.S., Oak Park, IL  
 Satya K Gutta, M.D., Fort Wayne, IN  
 Richard D. Ha, D.O., Roanoke, VA  
 Tarik Hadzic, M.D., Los Angeles, CA  
 Jennifer Hagstrom, M.D., San Francisco, CA  
 David Michael Halverson, M.D., Atlanta, GA  
 Maria Anna Herwegh Hamilton, M.D., Semmes, AL  
 John Hammond, M.D., Birmingham, AL  
 Bernadine Han, M.D., Brooklyn, NY  
 Yueheng Han, M.D., Wallingford, PA  
 Arun Handa, M.D., Philadelphia, PA  
 Ashlyn Lorraine Hankey, M.D., Austin, TX  
 Michael Christopher Hann, M.D., Murfreesboro, TN  
 Eric Travis Hansen, M.D., Tucson, AZ  
 Manassa Hany, M.D., New York, NY

Emma Clare Sutherland Hapke, MD, Toronto, ON  
Danish Haque, M.D., El Paso, TX  
Omar Sultan Haque, M.D., Cambridge, MA  
Nayla Hariz, M.D., Brooklyn, NY  
Patrick Hugh Harmon, M.D., Winston Salem, NC  
Omer Haroon, M.D., Albany, NY  
Daiana Julienne Harper, M.D., San Francisco, CA  
Amanda Harris, M.D., New York, NY  
Craig Alan Harris, M.D., Arcadia, CA  
James Hartzler, D.O., Traverse City, MI  
Sina Hashemi, M.D., Brooklyn, NY  
Ahmad Mohamed Hassan, M.B.Ch.B., Dallas, TX  
Deena Marie Hassan, M.D., Los Angeles, CA  
Geoffrey Benjamin Hauger, M.D., Dickinson, TX  
Mark Haygood, D.O., Mobile, AL  
Shuo He, M.D., Washington, DC  
Alexandra Hedberg, M.D., Chicago, IL  
Karsten M. Heil, M.D., New Haven, CT  
Alexander Heisler, D.O., Ellicott City, MD  
Kari Case Heistand, MD, Port Townsend, WA  
Renea E Henderson, D.O., Little Rock, AR  
Cheryl Hendricks, M.D., Los Angeles, CA  
Justin Hendricks, M.D., River Ridge, LA  
Brian Hendrickson, M.D., Baltimore, MD  
Joel Travis Hendryx, M.D., Houston, TX  
Michael J Henke, M.D., Slidell, LA  
Laurie Desiree Hernandez, M.D., San Antonio, TX  
Kathleen Hershon, M.D., West Simsbury, CT  
Mikal Hicks, D.O., Mantua, NJ  
Rebecca Hicks, M.D., Lancaster, NY  
Marla Hidalgo, D.O., Hoboken, NJ

Arthur William Higgins, M.D., Dunnellon, FL  
Jessica Jean Hill, D.O., Portsmouth, VA  
Benjamin Douglas Hines, M.D., Morgantown, WV  
Katie Hinzman, D.O., Avalon, PA  
Tomoya Hirota, M.D., San Francisco, CA  
Reina Hisada, M.D., Burlington, NC  
Joseph Gregory Hobelmann, M.D., Baltimore, MD  
Kimberly Hoenecke, D.O., Appleton, WI  
Michael Aaron Hoffnung, D.O., New York, NY  
Tara Elizabeth Holter, M.D., Rochester, NY  
Jonathan Chase Homans, M.D., Minneapolis, MN  
Louisa Hong, M.D., New York, NY  
Sara Sungwoon Hong, M.D., Philadelphia, PA  
Farnaz Hooshmand, M.D., Mountain View, CA  
Jeremiah Hopkins, M.D., Morgantown, WV  
Melissa Hopkins, M.D., San Francisco, CA  
Ruma Hopkins, M.B.B.S., Birmingham, MI  
Indira Bolano Horst, MD, South Miami, FL  
Kazi Firoz Hossain, M.D., Clearwater, FL  
Ario Hossein Hosseini, M.D., Louisville, KY  
Jordan Howard, M.D., Atlanta, GA  
Pamela Anne Howard, M.D., Westwood, MA  
Emily Howell-Little, M.D., Madison, WI  
Honor Hsin, M.D., Palo Alto, CA  
Cindy Huang, M.D., Baltimore, MD  
Heidi R Huang, M.D., Madison, WI  
William Howard Hudson, M.D., Atlanta, GA  
Roger Michael Huijon, M.D., Seattle, WA  
Ben Hunter, M.D., Atlanta, GA  
Emily Patricia Hutchison, M.D., Boise, ID  
Joel Hyduke, M.D., Fair Haven, NJ

Sara Hyoun, M.D., Los Angeles, CA  
Zaheib Idrees, D.O., North Hollywood, CA  
Chinedu Iheagwara, M.D., Clemmons, NC  
Jeffrey Matthew Iler, M.D., New Haven, CT  
Gabriella Inczedy-Farkas, M.D., Mill Neck, NY  
Michael Inesta, MD, Miami, FL  
Tanvir Iqbal, M.D., Boonton, NJ  
Shani Isaac, M.D., Millbrae, CA  
Lauren Isbell, M.D., Raleigh, NC  
Chidinma Isinguzo, M.B.B.S., Humble, TX  
Zahid Islam, M.B.B.S., Allentown, PA  
Aateqa Husein Ismail, M.D., Glen Oaks, NY  
Danielle Kathryn Ivanova, D.O., Royal Oak, MI  
Rissa Pryse Ivens, M.D., Nashville, TN  
Varsha Iyer, M.D., San Diego, CA  
Andrew Jackenheimer, M.D., Kenmore, WA  
Michael Jacob, M.D., San Francisco, CA  
Nicole Jacobs, M.D., Durham, NC  
Tania Jafary, M.B.B.S., Gilbert, AZ  
Farooqua Bano Jafri, M.B.B.S., Eagan, MN  
Justin James, M.D., Brooklyn, NY  
Adam C Jangula, M.D., Bismarck, ND  
Mohammad Junaid Javed, M.B.B.S., San Antonio, TX  
Kelly Jaziri, M.D., Norwich, CT  
Timothy Jeider, M.D., Las Vegas, NV  
James Albert Jenkins, M.D., Belmont, MA  
Aarti Jerath, M.D., Miami Beach, FL  
Ronak Ramesh Jhaveri, M.D., Cypress, CA  
Jianwei Jiao, M.B.B.S., Overland Park, KS  
Heather John, M.D., Kennett Square, PA  
Kevin Johns, M.D., Columbus, OH

Anne Johnson, M.D., Farmers Branch, TX  
Anne Dunbar Johnson, M.D., Apex, NC  
Kathryn Q. Johnson, D.O., Lynchburg, VA  
Kirsten Kesseboehmer Johnson, M.D., Minneapolis, MN  
Kurt Norman Johnson, M.D., Albuquerque, NM  
Sarah Lacourse Metthe Johnson, M.D., Honolulu, HI  
Kathryn Lindsey Johnson Cottone, M.D., Atlanta, GA  
Robert James Hutchinson Johnston, M.D.,  
Charlottesville, VA  
Ayodeji Idowu Jolayemi, M.D., New York, NY  
Alison Lee Jones, M.D., Denver, CO  
Jennifer Jones, M.D., Charleston, SC  
Katharine Joo, M.D., West Sacramento, CA  
Agnes M Joseph, M.D., Plano, TX  
Chenelle Mahalia C. Joseph, M.D., Grand Forks, ND  
Courtney Joseph, D.O., Baltimore, MD  
Jerry Joseph, M.D., Haworth, NJ  
Jessy Joseph, M.D., New York, NY  
Suchitra Joshi, M.D., Miami, FL  
Sandeep Kaur Jouhal, M.D., San Diego, CA  
Seth Judd, D.O., Columbia, SC  
Nadimire Jules-Dole, M.D., Lutherville-Timonium, MD  
Kevin Douglas Junkins, M.D., Morgantown, WV  
Lauren Claire Kaczka-Weiss, D.O., New Orleans, LA  
Rasheeda Kaghazwala, M.D., San Ramon, CA  
Stephen Daniel Kaiser, M.D., La Mesa, CA  
Sravan Kakani, M.D., Pacific Palisades, CA  
Saira Kalia, M.B.B.S., Tucson, AZ  
Marc Kalin, D.O., Madison, WI  
Simrun Kalra, M.D., San Francisco, CA  
Walter Kalu, M.B.B.S., Wichita, KS

Steven Kam, M.D., Albany, NY

Mohamed Arafat Kamel El Sayed, M.B.Ch.B., Frederick, MD

Farzad Kamyar, M.D., Las Vegas, NV

Tania Kannadan, M.D., Pittsburgh, PA

Joshua Kanner, M.D., Phoenix, AZ

Larkin Elderon Kao, M.D., Wayland, MA

Michelle Kaplan, M.D., Albany, NY

Kalvin Kapoor, D.O., Tamarac, FL

Mahtab Karkhane Yousefi, M.D., Farmington Hills, MI

Wittawat Kasayapanand, M.D., Phuket, Bangkok

Lesley Patrick Kassicieh, D.O., Lake Forest Park, WA

Vanessa Katon, D.O., East Hartford, CT

Margarita Kats, M.D., Middle Village, NY

Rachel Katz, M.D., Woodbridge, CT

Tamar Chaya Katz, M.D., Newton, MA

Ramandeep Kaur Ms., M.D., Clark, NJ

Brett Daniel Kaylor, D.O., Augusta, GA

Kathryn Keegan, M.D., New York, NY

Lauren Kelley, D.O., Bradenton, FL

Samantha Kennedy, D.O., Laingsburg, MI

Katherine Kerr, M.D., Santa Monica, CA

Andrey Khalafian, M.D., San Diego, CA

Fiza Khan, M.D., Kensington, MD

Jahanzeb Khan, M.D., Cleveland, OH

Jahanzeb Ali Khan Mr., M.B.B.S., Cotati, CA

Jeffrey Steven Khan, M.D., Cleveland, OH

Mohammed Asif Khan, M.D., Houston, TX

Rais Ahmad Khan, M.D., Springfield, VA

Saad Khan, D.O., Northport, NY

Sanober Khan, M.B.B.S., Flower Mound, TX

Shakaib Khan, M.D., Farmington, CT

Zubair Khan, D.O., Rego Park, NY

Surbhi Khanna, M.B.B.S., Charleston, SC

Renuka Kharkar, M.D., Valencia, CA

Jeremy Douglas Kidd, M.D., New York, NY

Caitlin Kieltyka, M.D., Humble, TX

Krishna Kilaru M.B.B.S., M.B.B.S., Stony Brook, NY

Brandon Heath Kilgore, M.D., Edmond, OK

Eugene Hyoungsoon Kim, M.D., Bakersfield, CA

Jea-Hyoun Kim, M.D., Sunnyvale, CA

Jinny Kim, M.D., Vestal, NY

Tyler Scott Kimm, M.D., Houston, TX

Daniel Landay Kimmel, M.D., New York, NY

Franklin King, M.D., Boston, MA

Neil King, M.D., Longmeadow, MA

Amanda Thomas Kingston, M.D., Hamden, CT

Drew Donovan Kiraly, M.D., New York, NY

Jonathan Kirscher, M.D., Houston, TX

Amanda Kate Klapchar, M.D., Canton, OH

Benjamin Orlando Klass, M.D., New York, NY

Matthew B Klein, D.O., Sunnyvale, CA

Sarah Kleinfeld, M.D., New Haven, CT

Jeremy Klopman, M.D., Brooklyn, NY

Julia Christine Knight, M.D., Hanover, NH

Micah James Knobles, M.D., Houston, TX

Todd Christopher Knudson, M.D., Vienna, VA

Barbara Kocsis, M.D., West Sacramento, CA

Dheeraj Kodali, M.B.B.S., Morgantown, WV

Jessica Anita Koenig, M.D., San Francisco, CA

Shawn Kohler, M.D., SLC, UT

Yelena Koldobsкая, M.D., Los Angeles, CA



Riley Konara, M.D., Moore, OK  
Charles Elias Koransky, M.D., Denver, CO  
Andrea Michelle Kornbau, M.D., Los Angeles, CA  
Linsey Sharon Koruthu, M.D., Boston, MA  
Joseph John Kosmach, D.O., Evanston, IL  
Sesha Krishna Kotapati, M.D., Odessa, TX  
Samuel Kothalanka, M.B.B.S., Harwich, MA  
Naga Kothapalli, M.B.B.S., Santa Rosa, CA  
Vanitha Dorairajan Kothapalli, M.D., Shreveport, LA  
Vinay Kothapalli, M.D., Shreveport, LA  
Riddhi Bipin Kothari, D.O., Seattle, WA  
Neda Kovacevic, M.D., Fairfax, VA  
Makeida Bukola Koyi, M.D., Ellicott City, MD  
Brian Kristoff, M.D., Denver, CO  
Ilia Kritikou, M.D., Philadelphia, PA  
Jerry Keith Kubena, MD, Fort Mohave, AZ  
Mallika Kucheria, M.D., Somerset, NJ  
Seon Brian Kum, M.D., West Hollywood, CA  
Alok Kumar, M.B.B.S., Enfield, CT  
Maanvi Kumar, M.D., Jamaica, NY  
Mahesh Kumar, M.B.B.S., Lakeville, MN  
Jananie Kumaran, M.D., Brooklyn, NY  
Niharika Kunapuli, M.B.B.S., Oro Valley, AZ  
Natalie Kurkjian, M.D., Oklahoma City, OK  
Kristen Owen Kusterer, M.D., Lexington, KY  
Elaine Kwok, M.D., STATEN ISLAND, NY  
Audrey La Noce, D.O., Pompano Beach, FL  
Danielle La Rocco, M.D., New York, NY  
Justin John Lacasse, D.O., Boston, MA  
Mary Theresa Veglia Ladd, M.D., Simpsonville, SC  
Nicholas Kensinger Ladd, D.O., Winston Salem, NC

Jasmin G Lagman, M.D., Philadelphia, PA  
Laura Jacqueline Lai, M.D., Orange, CA  
Tamkeen Lally, M.B.B.S., Belleville, NJ  
Ian Christopher Lamoureux, M.D., Cleveland, OH  
Elizabeth N Lampe, M.D., Wauwatosa, WI  
Johanna P. Landinez, M.D., Louisville, KY  
Elizabeth Cregan Langmore-Avila, D.O., Amherst, MA  
Brandon LaPrade, M.D., Phoenix, AZ  
Christina Elise LaRosa, M.D., Novi, MI  
Lauren Wood LaRose, M.D., New Orleans, LA  
David Michael Larson, M.D., San Diego, CA  
Jacob Laskey, M.D., Seattle, WA  
Samuel Lau, M.D., Miami Beach, FL  
Heather Laughridge, M.D., Huntersville, NC  
Matthew Jon Laurencelle, M.D., Royal Oak, MI  
Emily Ann Laurenzano, D.O., Longmeadow, MA  
Margaret Jean Lawler, M.D., Norfolk, MA  
Stephanie Marie Le, M.D., Columbia, SC  
John Clanton Leach, M.D., Little Rock, AR  
Robert Ryan Leahy, M.D., Miami Beach, FL  
Samantha Leathers, M.D., New York, NY  
Eric Lederman, M.D., Longmeadow, MA  
Brian Guy LeDuc, M.D., Columbia, SC  
Janet Lee, M.D., Ellicott City, MD  
Yujin Lee, M.D., Los Angeles, CA  
Jaclyn Elizabeth Allred Legg, D.O., Mission Woods, KS  
Nicole Leistikow, M.D., Baltimore, MD  
Guillermo Leoz Callizo, M.D., Rochester, MN  
William Gregory Levitt, M.D., Lebanon, NH  
Kathleen Levy, D.O., Long Island City, NY  
Carol Elaine Lewis, MD, Cleveland Heights, OH

Ian Lewis, D.O., Cheyenne, WY

Charles Edward Leyster, D.O., Olympia, WA

Randi Libbon, M.D., Denver, CO

Naomi Libby, M.D., New Haven, CT

Stephanie Lichtor, M.D., Chicago, IL

Joanna Lim, M.D., Arlington, VA

Ateaya Lima, M.D., Levittown, NY

Victor Anthony Linden, M.D., Harahan, LA

Lisa Lindquist, M.D., Eagle River, AK

Cecilia Lipira, M.D., New York, NY

Emily Lisco, M.D., Philadelphia, PA

Philip Yen-Tsun Liu, M.D., San Antonio, TX

Clayton Lively, M.D., Valdosta, GA

Paulo Leonel Lizano, M.D., Boston, MA

Pachida Lo, M.D., West Sacramento, CA

Bryan Lockmer, D.O., Pittsburgh, PA

Maximo Bienvenido Lockward, M.D., Boardman, OH

Laura E Lockwood, D.O., Aiea, HI

Ashutosh Lodhi, M.B.B.S., Portland, OR

Kelly Apgar Logan, D.O., Cross Lanes, WV

Elena Logvinenko, M.D., Portland, OR

Jason Arturo Longoria, MD, Spokane, WA

Pamela Ann Lopez, M.D., Austin, TX

Erik K Loraas, M.D., Pittsburgh, PA

Marie M Lord, D.O., Santa Monica, CA

Janeris Loreda, M.D., Grovetown, GA

Ryan K. Louie, M.D., Ph.D., San Francisco, CA

Holly Love, M.D., Huntington Beach, CA

Molly Lubin, M.D., Madison, WI

Anca Luminare, M.D., Fair Oaks, CA

Tinh Nghi Luong, M.D., Los Angeles, CA

Svetlana A Lupashko, D.O., New York, NY

Julia Lustick, M.D., Longmeadow, MA

Ryan Matthew Lydon, M.D., Abington, MA

Ashley MacLean, M.D., Syracuse, NY

Rehman Madraswala, M.D., Edison, NJ

Gayathri Ananda Mahendiran, M.D., Fresh Meadows, NY

Megan Maher, M.D., New Orleans, LA

Meredith Elise Mahilo, M.D., University Heights, OH

Michael Maksimowski, M.D., Hamden, CT

Maria Josefa Malaga Aragon, M.D., New York, NY

Patrice Karen Malone, M.D., New York, NY

Anup S. Mani, D.O., Toms River, NJ

Erika Manis, M.D., Perrysburg, OH

Andrew Manoski, D.O., Tinton Falls, NJ

Maria Manouselis, D.O., Armonk, NY

Rabeea Mansoor, M.D., Strongsville, OH

Kai-Hong Jeremy Mao, M.D., Los Angeles, CA

Daniela G Marcella Ms., M.D., Cleveland, OH

Michael Brandon Marcus, M.D., Northridge, CA

Rachel D Maree, M.D., Savannah, GA

Scott Donald Mariouw, M.D., Detroit, MI

Mallory Dawn Markloff, M.D., Worcester, MA

Jacob Jeremy Markovitz, M.D., Seattle, WA

Carly Renee Marshalla, M.D., Clovis, CA

Christina Martin, M.D., Riverview, FL

Rogelio Martinez, M.D., Rockville, MD

Gloria Renee Martz, D.O., Norman, OK

Syeda Fatematul Marzia, M.B.B.S., New Hyde Park, NY

Constance Elizabeth Mash, M.D., Bigfork, MT

Kanaklakshmi Masodkar, M.B.B.S., Florence, SC

Zara Masood, M.B.B.S., Sault Sainte Marie, MI

Fatima A Masumova, D.O., East Norwich, NY  
Diana Mata, D.O., Alexandria, VA  
Walter Stan Mathis, M.D., Hamden, CT  
Avery M Matthews, M.D., Christiansburg, VA  
William Matthews, M.D., Apex, NC  
Andrew Matz, M.D., Washington, DC  
Matthew Ryan May-Curry, M.D., Madison, WI  
Petronella Taku Mbu, M.D., Roanoke, VA  
Stacy McAllister, M.D., Wayne, PA  
Catherine McCall, M.D., Seattle, WA  
Sarah Elizabeth McClanahan, D.O., Tulsa, OK  
Danny McClure, D.O., Glendale, AZ  
Bridget McCoy, M.D., Bronx, NY  
Cristin McDermott, M.D., Pittsburgh, PA  
Jessica Dianne McGarity, M.D., Columbia, SC  
Mary-Katherine Cecelia McGovern, M.D., Stanford, CA  
Chance McInnis, D.O., New Orleans, LA  
Megan McLeod, M.D., Portland, OR  
Cody Robert McMahan, M.D., Mc Gregor, TX  
Laurence DeRich McMillan, M.D., Birmingham, AL  
John McMillin, M.D., Cranston, RI  
Donald McNally, D.O., East Hartford, CT  
Travis Vincent Meadows, M.D., New York, NY  
Erik Guillermo Medina Pi, MD, Cabo Rojo, PR  
Morgan Medlock, M.D., Jamaica Plain, MA  
Kruti Mehta, D.O., Old Bridge, NJ  
Nisha Mehta-Naik, M.D., New York, NY  
Aldo Valentino Mejia, M.D., Kenner, LA  
Robert Douglas Mendenhall, M.D., San Francisco, CA  
Robert John Mendenhall, D.O., Highland, UT  
Camille L Mendez Maldonado, M.D., New York, NY  
Alexandra M,ndez Ruiz, M.D., San Juan, PR  
Julia Sarsfield Merti, M.D., Ellicott City, MD  
Ludmilar Mesidor, D.O., Amawalk, NY  
Justin Patrick Meyer, M.D., New York, NY  
David R Michael, D.O., Chicago, IL  
Philip Fred Michael, M.D., Ashland, OR  
Catherine Rose Mier, M.D., New York, NY  
Agnieszka Milczarek, M.D., Saint Louis, MO  
Benjamin Milczarski, M.D., Baldwinsville, NY  
Olga Milgrom, M.D., Pittsburgh, PA  
Elana Halks Miller, M.D., Los Angeles, CA  
Gregory Devon Miller, D.O., Fernandina Beach, FL  
Jeremy Miller, M.D., Albuquerque, NM  
Lindsey Knicole Miller, M.D., Brandon, SD  
Michael S. Miller, M.D., Galveston, TX  
Michael Millstone, M.D., NEW YORK, NY  
Renee Ruth Minirth, M.D., Memphis, TN  
Darlinda Kirby Minor, M.D., Crestview Hills, KY  
Carrie Morris Mintz, M.D., Saint Louis, MO  
Delimar Miranda-Viera, M.D., Ponce, PR  
Ella Miropolskiy, M.D., Renton, WA  
Jeffrey Mirsky, M.D., Northbrook, IL  
Samina Mirza, M.B.B.S., Jersey City, NJ  
Luke Misquitta, M.D., Columbus, OH  
Alexandra Mnuskin, M.D., Baltimore, MD  
Dilip Mohan Velu, M.D., Bellerose, NY  
Payam Mokhtari, M.D., Kansas City, KS  
Brian David Monette, M.D., Prairieville, LA  
Cristina Montalvo, M.D., Needham, MA  
Roberto Montenegro, M.D., Seattle, WA  
Callie Deann Montez, M.D., San Antonio, TX

Ingrid Montgomery, M.D., Nanuet, NY  
Gabriel Monthan, M.D., Albuquerque, NM  
Sarah Moon, M.D., Lexington, KY  
Lauren Elizabeth Moore, M.D., Charlottesville, VA  
Michael Brandon Moore, M.D., Arlington, VA  
Shenitta Denise Moore, M.D., Grenada, MS  
Maria Elena Moreno, M.D., Mount Pleasant, SC  
Daniel Moreno De Luca, M.D., Providence, RI  
Rachel Morenz, M.D., Hood River, OR  
Sophianne Morgan, M.D., Cincinnati, OH  
Lauren Anne Aiosa Morris, M.D., Boston, MA  
Raymond Morris, M.D., Newington, CT  
Sandra Morris, M.D., Durham, NC  
Gino Mortillaro, M.D., Dorchester, MA  
Steffany R Morton, M.D., Akron, OH  
Aris Mosley, M.D., Phoenix, AZ  
Hala Moustafa, M.B.Ch.B., Sharon, MA  
Shamik Mukherji, M.D., Mineola, NY  
Tua-Elisabeth Mulligan, M.D., San Francisco, CA  
Mallory Anne Mulroy, M.D., Dallas, TX  
Ashley Ann Mulvihill, M.D., Carol Stream, IL  
Joann Gail Mundin, MD, Las Vegas, NV  
Sahil Munjal, M.D., Hamden, CT  
Andrew Patrick Murray, D.O., Franklin, MA  
Bradley Lynn Murray, M.D., SLC, UT  
Purushothaman Muthukanagaraj, M.B.B.S., Greenville, NC  
Veena Rao Muthusamy, M.D., New York, NY  
Nanda Muthusawmy, M.D., Jersey City, NJ  
Jessica Myers, D.O., Portland, OR  
Vanessa Myles, M.D., Guilford, CT

Farid Nader, M.D., Newbury Park, CA  
Sumit Naig, M.D., West Hollywood, CA  
Neil Naik, M.D., Chapel Hill, NC  
John Naliyath, M.D., Port Saint Lucie, FL  
Whitney Dane Nall, M.D., Saint Louis, MO  
Travis Noble Nance, M.D., Deer Park, TX  
Swathi Narahari, M.D., Dublin, OH  
Caroline Y Nardi, M.D., Little Rock, AR  
Rebekah Nash, M.D., Chapel Hill, NC  
Nakita Grace Natala, M.D., Ypsilanti, MI  
Milankumar Nathani, M.D., Gainesville, FL  
Yasmin Nazia, M.B.B.S., South River, NJ  
Racha Fayez Nazir, M.D., My. Laurel, NJ  
Nana-Aba Nduom, M.D., Seattle, WA  
Julia Nelligan, M.D., Hartford, CT  
Scott Nelson, M.D., New Orleans, LA  
Fabiano Goncalves Nery, M.D., Cincinnati, OH  
Ariana Elizabeth Nesbit, M.D., Sacramento, CA  
Kirsten Nestler, M.D., Seattle, WA  
Elisabeth Ware Netherton, M.D., Houston, TX  
Surya Nethikunta, M.B.B.S., Monmouth Junction, NJ  
Khoa Nguyen, D.O., Fort Worth, TX  
Rachel Nguyen, M.D., Escondido, CA  
Viet Thuy Nguyen, M.D., Los Angeles, CA  
Samuel Alvin Nicolas IV, M.D., FPO, AP  
Vahid Nikzad, M.D., Glendale, CA  
Violeta Nistor, M.D., Anderson, SC  
Abhishek Ravindra Nitturkar, M.B.B.S., Washington, DC  
Janice Carolyn Niver, M.D., Westminster, CO  
Sheldon Noble, M.D., Paradise, NL  
Emily Ann Novik, M.D., Verona, NJ

Furqan Nusair, M.D., New York, NY  
 Ifeoma Cynthia Nwugbana, M.B.B.S., Yonkers, NY  
 Aengus O Conghaile, M.B.Ch.B., Boston, MA  
 Nora Oberfield, M.D., New York, NY  
 Laura Obit, D.O., Claremont, CA  
 Kelechi Ohayagha, M.D., Memphis, TN  
 Linda Ojo, M.D., Herndon, VA  
 Adamma Okorafor, M.D., New York, NY  
 Chinonyerem Okwara, M.D., Irving, TX  
 Meredith Adaora Okwesili, M.D., San Antonio, TX  
 William Oliva, M.D., Oklahoma City, OK  
 Bolanle Oluwakemi Oluwadara, M.B.B.S., Rancho Cucamonga, CA  
 Rozan Omdah, M.D., Carrboro, NC  
 Christopher Francis Ong, M.D., Gainesville, FL  
 Chinenyenwa Akualo Onyemaechi, M.D., Columbia, MD  
 Rejoice Ngozi Opara, M.D., Seattle, WA  
 Cecilia Eloisa Ordonez Moreno, M.D., Durham, NC  
 Carmen Aida Orellana Martinez, M.D., Springfield, IL  
 Joanne Orfei, D.O., Milwaukee, WI  
 Stephen Judd Orgill, D.O., Lehi, UT  
 Nadia Acomo Oryema, M.D., New York, NY  
 Aurora Nicole Osteen, M.D., Austin, TX  
 Julie Ruth Owen, M.D., Milwaukee, WI  
 Andrew Venters Owens, D.O., Statesville, NC  
 Eugene Owsley, M.D., Louisville, KY  
 Micaela Bea Owusu, M.D., Boston, MA  
 Chaitanya Pabbati, M.D., San Diego, CA  
 Brittany Pace, M.D., Tucson, AZ  
 Luz Elizabeth Pacheco, M.D., Charleston, SC  
 Juvraj Padda, M.D., Seattle, WA  
 Vinodkumar Paddolkar, M.D., Burlington, IA  
 Heena Panchal, M.D., San Jose, CA  
 Philip Perry Papparone, M.D., Jamesville, NY  
 Mrunal Ghanshyam Parab, M.B.B.S., San Diego, CA  
 Ana Lorena Paredes, M.D., Miami, FL  
 Arpan Parikh, M.D., New York, NY  
 Rajiv Parinja, M.B.B.S., Solon, OH  
 Dong Chan Park, M.D., Bedford, MA  
 Sang Joon Park, M.D., Arlington, TX  
 Jeremy Agu Parker, M.D., Portland, OR  
 Kimberly Deborah Lauren Parks, M.D., Houston, TX  
 Ajay Kumar Parsaik, M.B.B.S., Marshfield, WI  
 Erik Paschall, M.D., Los Angeles, CA  
 Steve Paschos, M.D., Park Ridge, IL  
 Phaedra Elizabeth Pascoe, M.D., Seattle, WA  
 Christina Kiley Pastorello, M.D., Providence, RI  
 Anand Patel, M.D., Sebring, FL  
 Biren Prakash Patel, M.D., Houston, TX  
 Birju I Patel, M.D., Chicago, IL  
 Bonny Patel, M.D., Kew Gardens, NY  
 Charmaine Kamini Patel, M.D., Orono, ME  
 Ekta Patel, M.D., New York, NY  
 Karina Patel, M.D., Charleston, WV  
 Kiran C Patel, M.D., Highlands Ranch, CO  
 Madhvi Patel, M.D., Seattle, WA  
 Priyanka Patel, M.D., Peoria, IL  
 Raj Kirit Patel, M.D., Clemmons, NC  
 Shirali Suryakant Patel, M.D., Missouri City, TX  
 Neil Paterson, M.D., Los Angeles, CA  
 Meenal Pathak, M.B.B.S., Akron, OH  
 Dustin Vinit Patil, M.D., Charlestown, MA

Mallika Patri, M.B.B.S., New Delhi, DEL  
Deepa Pawar, M.D., Milwaukee, WI  
Jeffrey Steven Pawlowski, M.D., Novi, MI  
Paul Kevin Pawlowski, M.D., Long Beach, CA  
Alana Pearson, M.D., Rochester, NY  
Virginia Pearson, M.D., Bala Cynwyd, PA  
Ernest Pedapati, M.D., Cincinnati, OH  
Amanda Richardson Pedrick, M.D., Columbus, OH  
Laurel Dineen Pellegrino, M.D., Seattle, WA  
Francesco Peluso, M.D., Riverside, RI  
Vanessa Grace Panizales Penaranda, M.D., Harlingen, TX  
James Gibson Pennington, M.D., Oakwood, OH  
Ian J Penniston, D.O., Sioux Falls, SD  
Joant Perdomo Espinal, M.D., Columbia, SC  
Ella Peresechenski, M.D., Chevy Chase, MD  
Kenny Perez, M.D., Miami, FL  
Natasha Damaris Perez Rivera, M.D., Boston, MA  
Ian Peters, D.O., Philadelphia, PA  
Jonathan Charles Pfeifer, M.D., Dothan, AL  
Thuc Phan, M.D., Houston, TX  
Tammi-Marie Phillip, M.D., New Haven, CT  
Nelson A Pichardo, MD, Santa Rosa Beach, FL  
Andrew Pierce, M.D., Nashville, TN  
Mayumi Pierce, M.D., San Francisco, CA  
Justin Scott Piershalski, M.D., Brooklyn, NY  
Krista Linn Pinard, M.D., Las Vegas, NV  
Patrick Pinchinat, M.D., Weston, FL  
Ruben Pinero Fuentes, M.D., Edinburg, TX  
William Bradly Pitts, M.D., Manhattan, KS  
Vincent Placido, D.O., Phoenix, AZ  
Natalie Caryn Pon, M.D., McKinney, TX

Alex Sandra Porrata-Ortiz, M.D., San Juan, PR  
Fanisha Yvonche Porter, M.D., Milwaukee, WI  
Hillary Porter, D.O., Ironton, OH  
Robert Murphy Portley, M.D., Dallas, TX  
Bennett Poss, M.D., Minneapolis, MN  
Kimia Pourrezaei, D.O., Brooklyn, NY  
David Prado, D.O., Philadelphia, PA  
Parna Ramprasad Prajapati, M.B.B.S., Irving, TX  
Amitha Prasad, D.O., Albuquerque, NM  
Srikanth Prayaga, M.B.B.S., Augusta, GA  
Iuliana Predescu, M.D., Mountain View, CA  
Beena Jennifer Premkumar, M.D., Brandon, MS  
Stefania Prendes-Alvarez, M.D., Miami, FL  
Nathan Robert Prichard, D.O., Pleasant Valley, MO  
Diana Isabel Prieto, M.D., Dallas, TX  
Elizabeth Prince, D.O., Baltimore, MD  
Yuliya Eduardovna Proosaselts, M.D., San Diego, CA  
Alan Rodney Prossin, M.B.B.S., Bellaire, TX  
Demetrio Jose Prota Martinez, M.D., Tupelo, MS  
Sara Puening, M.D., Denver, CO  
Rocio Puentes, M.D., Tampa, FL  
Aditya Pulikal, M.D., Miami Gardens, FL  
Robert Jarreau Pulliam, M.D., Cincinnati, OH  
Madhuri Pulluri, M.D., Peoria, AZ  
Srinivasa Reddy Punyala, M.B.B.S., Henrico, VA  
Shiraz Qalbani, M.D., Lexington, KY  
Benjamin Quiambao, M.D., Norman, OK  
Pia Quimson-Guevarra, D.O., Beaverton, OR  
Jamal Ahmad Qureshi, M.D., Blaine, MN  
Edwin Raffi, M.D., Boston, MA  
Abhishek Rai, M.D., Franklin, PA

|                                                     |                                                     |
|-----------------------------------------------------|-----------------------------------------------------|
| Ryan Rajaram, M.D., New Haven, CT                   | Rachel Michelle Abbott Rhodes, D.O., Temple, TX     |
| Suja Raju, M.B.B.S., Mooresville, NC                | Thomas Michael Ricart, M.D., Springfield, NJ        |
| Cody Rall, M.D., Bethesda, MD                       | William Riccardelli, M.D., Mahopac, NY              |
| Ravi Ramasamy, M.D., Chicago, IL                    | Charles David Richardson II, D.O., Hattiesburg, MS  |
| Natalie Ramirez, M.D., Mountain View, CA            | Nina Korsaeva Riordan, M.D., Houston, TX            |
| Kavita Rampersad, M.D., New York, NY                | Yedida Rissman, M.D., Cortez, CO                    |
| Nisha S. Ramsinghani, D.O., Anaheim Hills, CA       | Aaron Ritter, M.D., Las Vegas, NV                   |
| Omar Riaz Rana, D.O., Charlotte, NC                 | Syed Shamshad Ali Rizvi, M.B.B.S., Harrisonburg, VA |
| Griffan Randall, D.O., Guilderland, NY              | Andrew Roads, M.D., Lexington, KY                   |
| Afshan Ranjha, M.D., Elmhurst, NY                   | Darrell Roberge, D.O., North Logan, UT              |
| Roberta Rasetti, M.D., Bethesda, MD                 | Aaron Jesse Roberto, M.D., Easton, CT               |
| Ali Abbas Rashid, M.B.B.S., New Haven, CT           | Tricia Mendoza Roberts, M.D., Sacramento, CA        |
| Shama Sanjivan Rathi, M.D., New York, NY            | Rachel Anne Robitz, M.D., Sacramento, CA            |
| Awtar Karan Rathore, D.O., Bakersfield, CA          | Sarah Elizabeth Rocha, M.D., Cranston, RI           |
| Ajeetha N Ravindrados, M.B.B.S., Lafayette Hill, PA | Katherin Rockefeller, M.D., Cape Elizabeth, ME      |
| Anupriya Razdan, M.B.B.S., Baltimore, MD            | Diego Felipe Rodriguez, M.D., San Antonio, TX       |
| Kathleen Elizabeth Rean, M.D., Seattle, WA          | Mauricio Enrique Rodriguez, M.D., Miami, FL         |
| Gundu A. Reddy M.D., , New York, NY                 | Thomas Rodriguez, M.D., Los Angeles, CA             |
| Andrey E Reed, M.D., North Little Rock, AR          | Laura Maria Rodriguez-Roman, M.D., Gainesville, FL  |
| Hannah E. Reed, M.D., New York, NY                  | Catherine Rogers, M.D., Gulfport, MS                |
| Molly Elizabeth Reeves, M.D., Birmingham, AL        | Christopher Rogers, M.D., Westminster, CO           |
| Nathaniel David Reich, M.D., Arvada, CO             | Joan Roig Llesuy, M.D., New York City, NY           |
| Robert Reidenbaugh, M.D., Seattle, WA               | Alexis Rojas, M.D., San Diego, CA                   |
| Lillian Grace Reilly-Prado, D.O., Philadelphia, PA  | Luke Romanow, M.D., Charlottesville, VA             |
| Stefani Lane Reinold, M.D., Suffolk, VA             | Rebecca E Romero, M.D., La Jolla, CA                |
| Jessica Ann Reis, M.D., Crestwood, KY               | Andrea Rosati, M.D., San Francisco, CA              |
| Shannon Remick, M.D., Loma Linda, CA                | Sarah Kate Rosenbaum, M.D., San Francisco, CA       |
| Taras Romanovych Reshetukha, MD, Kingston, ON       | Meghan Munro Ross, MD, Tampa, FL                    |
| Kimberly S Resnick, M.D., New York, NY              | Kevin Benjamin Rowe, D.O., Oak Park, IL             |
| Jessica Carmen Reuben, M.D., Belton, TX             | Emily Summerfield Rowland, M.D., Wakefield, RI      |
| Laura Reynolds, M.D., Lexington, KY                 | Jennifer Catherine Ruane, M.D., Philadelphia, PA    |

Jose Manuel Rubio-Lorente, M.D., Astoria, NY  
Trevor Rudge, M.D., Hamilton, NJ  
Elvira Rudner, M.D., Allendale, NJ  
Sally Ryan, D.O., Larkspur, CA  
Mark Rynda, D.O., Minneapolis, MN  
Linda Saab, M.D., Canton, MI  
Spencer Sabin, M.D., New York, NY  
Aysha Zara Sabri, M.D., Austin, TX  
Kristen Sadana, M.D., Redding, CT  
Reem Sadda, M.B.Ch.B., Bergenfield, NJ  
Zachary Sager, M.D., Roxbury, MA  
David Sahadevan, M.D., Westerville, OH  
Geetanjali Sahu, M.B.B.S., Houston, TX  
Nishma Saini, M.B.B.S., Johnstown, PA  
Marwa Mohamed Salam Ms., M.B.Ch.B., Parsippany, NJ  
Md Towhid Salam, M.D., Bakersfield, CA  
Ayman Saleh, M.D., New Haven, CT  
Shilpa Sammeta, M.B.B.S., Morgantown, WV  
Neelam K Sampley, M.D., Seattle, WA  
Alexander Rene Sanchez, M.D., New York, NY  
Susana Sanchez Guzman, M.D., Florence, AL  
Yuliet Sanchez-Rivero, M.D., Jacksonville, FL  
Eric G Santos, M.D., Lake Mary, FL  
Akinlabi Sanusi, M.D., Avenel, NJ  
Kaitlin Maria Sanzone, M.D., Lexington, SC  
Ehsan Sarabi, M.D., Irvine, CA  
Karen Laguren Saroca, M.D., Boston, MA  
Sharmalie Sarvananda, MD, Granite Bay, CA  
Jasmine Sawhne, M.D., Staten Island, NY  
Parnika Prashasti Saxena, M.B.B.S., Auburndale, MA  
Adrienne Saxton, M.D., Sagamore Hills, OH

Jerry Michael Sayers, MD, YORK, PA  
Katherine Scangos, M.D., San Francisco, CA  
Elizabeth Schmick, D.O., Portland, OR  
Sarah B Schmidhofer, M.D., Providence, RI  
Kristen Anne Schmidt, M.D., Los Angeles, CA  
Ryan Patrick Schmidt, M.D., Cincinnati, OH  
Sarah Schmitz, M.D., Chapel Hill, NC  
Elle Marie Schollnberger, M.D., Potomac, MD  
Ariel R Schonfeld, M.D., Palo Alto, CA  
Coleen Schrepfer, M.D., Baltimore, MD  
Andrew Segraves, D.O., Olathe, KS  
Jonathan Jay Serrato, M.D., Mission Viejo, CA  
Sidharta Seth, M.D., Oklahoma City, OK  
Stephanie Carol Setliff, M.D., Dallas, TX  
Joshua Shabani, M.D., Somerville, MA  
Hadia Shafi, MBBS, Atlanta, GA  
Hassan Murtaza Shah, M.B.B.S., Chesterfield, VA  
Nisha Shah, M.D., Mequon, WI  
Ruchi Shah, M.D., Troy, MI  
Syed Sikandar Shah, M.B.B.S., Dover, DE  
Erum Shahab, M.D., Ellington, CT  
Juvaria Shahabuddin, M.D., Northbrook, IL  
Atef Shaikh, D.O., Brooklyn, NY  
Julia Shakh, M.D., Amherst, NY  
John Preston Shand, M.D., Philadelphia, PA  
Wanda Shao, D.O., Atlanta, GA  
Neeta Sharma, M.B.B.S., Longmeadow, MA  
Pravesh Sharma, M.B.B.S., Baltimore, MD  
Nidhi Sharoha, D.O., East Meadow, NY  
Nathaniel Grant Sharon, M.D., Albuquerque, NM  
Thomas Bruce Shaver, M.D., Alexandria, VA



Danielle R Shaw, M.D., CAMARILLO, CA  
 Mahrokh Shayanpour, M.D., Glendale, CO  
 Shady S. Shebak, M.D., East Lansing, MI  
 Susan Shen, M.D., Livermore, CA  
 Manisha Shenava, M.D., Redwood City, CA  
 Carolyn Kazuko Shima, M.D., Chicago, IL  
 Suzanne Shimoyama, M.D., Sacramento, CA  
 Sohal Shipu, M.B.B.S., Jamaica, NY  
 Nicole Shirvani, M.D., Medford, OR  
 Suman Shiva, M.B.B.S., Richmond Hill, NY  
 Suparna Shivashankara, M.D., Tuscaloosa, AL  
 Inna Kavalerchik Shleymovich, M.D., Brooklyn, NY  
 Ahmad Shobassy, M.D., Southfield, MI  
 Jessica Short, D.O., Grove City, OH  
 Joseph Scott Shotwell, M.D., Galveston, TX  
 Marla Ann Shu, D.O., Seattle, WA  
 Justin M Shuster, M.D., Pittsburgh, PA  
 Izabella Shuvayev, M.D., New York, NY  
 Aaron Siani, M.D., Los Angeles, CA  
 Farhat Siddiqui, M.D., Houston, TX  
 Kamalpreet Sidhu, M.D., Lathrop, CA  
 Shweta Sidhu, M.B.B.S., Rochester, NY  
 Keila Michelle Sierra-Cintron, M.D., Peoria, IL  
 Yona Silverman, M.D., New York, NY  
 Jessica Simberlund, M.D., New York, NY  
 Adam Christopher Simning, M.D., Pittsford, NY  
 Whitney Elizabeth Simone, M.D., Philadelphia, PA  
 Shahrzad Annahita Sims, D.O., Quincy, MA  
 Richard Sean Sinclair, M.D., Mobile, AL  
 Mary Elizabeth Singeltary, D.O., West Chester, OH  
 Balwinder Singh, M.B.B.S., Rochester, MN  
 Rajinder Singh, M.D., Warwick, RI  
 Sunpreet Singh, M.D., Buena Park, CA  
 Vikas Kumar Sinha, M.B.B.S., Columbia, MD  
 Scott Siskind, M.D., Berkeley, CA  
 Soumya Sivaraman, M.B.B.S., Hoover, AL  
 Matthew Evan Sloan, MD, Washington, DC  
 Andrew Slye, D.O., Sackets Harbor, NY  
 Amanda P Smith, M.D., Maumelle, AR  
 Beverly Diane Smith, M.D., Kirkwood, MO  
 Brian Clark Smith, M.D., Tucson, AZ  
 Derek Michael Smith, M.D., Louisville, KY  
 Jonathan Daniel Smith, M.D., Nashville, TN  
 LaCheryl Shanti Smith, M.D., Astoria, NY  
 Ana Victoria Smrha, M.D., Brookfield, IL  
 Christopher J Snyder, D.O., Edmond, OK  
 Harsh Soni, M.D., Charleston, SC  
 Jill Spice, M.D., Denver, CO  
 Laima Spokas, M.D., Pittsburgh, PA  
 Jerrod Spring, M.D., Tulsa, OK  
 Anupriya Srivastava, M.D., Madison, WI  
 Elizabeth Nakawesi Ssemenda, M.D., Austin, TX  
 Antonina Stakheiko, MD, Kingston, ON  
 Demetra Serena Stamm, M.D., Belmont, CA  
 Vanessa Alexandra Stan, M.D., Chicago, IL  
 Corneliu Stanciu, M.D., Manchester, NH  
 Charles Stanfa, D.O., Phoenixville, PA  
 Brad Stankiewicz, M.D., Boston, MA  
 Shaun Stanley, M.D., Canonsburg, PA  
 Amy Leigh Stark, M.D., Shelton, CT  
 Carl E Starr, M.D., FPO, AP  
 Joshua A Stein, M.D., New York, NY

Louisa Juliane Steinberg, M.D., New York, NY  
Curtis R Stennett, M.D., Indianapolis, IN  
Kyle Stephens, M.D., Boston, MA  
David Aaron Stern, M.D., Houston, TX  
Elizabeth Sherron Stevens, D.O., Arvada, CO  
Anderson E. Still, M.D., Pittsburgh, PA  
Arielle Stone, M.D., Bloomfield Hills, MI  
Sarah Lind Stone, M.D., Georgetown, TX  
Steven Storage, M.D., Los Angeles, CA  
Stephanie Stratigos, D.O., Worcester, MA  
David Sturman, M.D., Boston, MA  
Claudia Alejandra Suardi, M.D., Brooklyn, NY  
Jomar Suarez, M.D., Black Hawk, CO  
Joel Michael Suckow, MD, Keizer, OR  
Nicole Ilana Sussman, M.D., Cambridge, MA  
Erin P Sutton, M.D., Cary, NC  
Alla F. Sverdlik, M.D., Pasadena, CA  
Weston Zon Swearingen, M.D., Orofino, ID  
Nathalie Szilagyi, M.D., Meriden, CT  
Dina M Sztejn, M.D., Hanover, MD  
Alan Szymanski, M.D., Westerville, OH  
Khandaker Abu Taher, M.D., Brooklyn, NY  
ADefemi Taiwo, M.B.B.S., Milford, CT  
Rachel Elizabeth Talbot, M.D., Ann Arbor, MI  
Christina Talerico, M.D., Fairhope, AL  
John L. Tan, M.D., Reno, NV  
Melanie Tapia Hernandez, M.D., Toa Alta, PR  
Daniel Drew Tarman, M.D., San Diego, CA  
Mohammad Tavakkoli, M.D., New York, NY  
Timothy Mark Tawa, M.D., Cerritos, CA  
Dreylana S Taylor, M.D., Tulsa, OK

Jacob Louis Taylor, M.D., Cambridge, MA  
JENNIFER TAYLOR, M.D., Union, NJ  
Matthew Harrison Taylor, M.D., Baltimore, MD  
Sophia Veronica Tedeschi, M.D., Sacramento, CA  
Eric Tee, M.D., West Fargo, ND  
Vesselin T Tenev, M.D., Iowa City, IA  
Lauren Teverbaugh, M.D., New Orleans, LA  
Sowmya Tewari Ms, M.D., New York, NY  
Tina S. Thakrar, M.D., Midlothian, VA  
Thida Thant, M.D., Denver, CO  
Nitin Thapar, D.O., Woodridge, IL  
Abraham Thengampallil, M.D., Valley Cottage, NY  
Lauren Thomas, M.D., Miami, FL  
Mottsin Lawrence Thomas, M.D., Long Beach, CA  
Katelyn Marie Thompson, D.O., Fort Dodge, IA  
John Michael Thurston, M.D., Norfolk, VA  
Denali Tice, M.D., Sacramento, CA  
Amilcar Arnaldo Tirado, M.D., Syracuse, NY  
Owais Tirmizi, M.D., Austin, TX  
Piyush Tiwari, M.D., Honolulu, HI  
Michelle To, M.D., New York, NY  
Delia Glisette Toledo, M.D., Nokomis, FL  
Joshua C Tompkins, M.D., Los Angeles, CA  
Jennifer Rosemore Tonini, DO, Ft Worth, TX  
Suzette Toombs, M.D., Houston, TX  
Ann Marie Torres, M.D., Arlington, TX  
Johanna Torres, M.D., Edinburg, TX  
Tyson Torres, M.D., Redwood City, CA  
Jonathan Josue Torres Crespo, M.D., San Juan, PR  
Alexis Torres Rodriguez, MD, San Juan, PR  
Stephen Mankata Tourjee, M.D., Wakefield, MA

Parmalee Towb, M.D., Swansboro, NC  
 David Tran, M.D., San Francisco, CA  
 Shelly Tran Tran, M.D., Stanford, CA  
 Tri Tran, M.D., Albany, NY  
 Christine Evelyn Ngoc Tran-Boynes, D.O., Baltimore, MD  
 Nicholas Thomas Trapp, M.D., Iowa City, IA  
 Jennifer Lynn Traxler, D.O., Astoria, NY  
 Matie Rose Brittan Trewe, M.D., Eugene, OR  
 Ludwig Trillo Alvarez, M.D., Saint Louis, MO  
 Anh Lan Truong, M.D., Houston, TX  
 Rishell Tsujimoto-Ryzewski, M.D., Las Vegas, NV  
 Stephanie Cecilia Tung, M.D., Jamaica Plain, MA  
 Tali Tuvia, M.D., New York, NY  
 Claire Marie Twark, M.D., Jamaica Plain, MA  
 Colby Tyson, M.D., Hyattsville, MD  
 Theresa Kathryn Umhoefer, M.D., Franklin, WI  
 Naveed Ummed, MD, Johns Creek, GA  
 Blair Williams Uniacke, M.D., Ridgewood, NJ  
 Grace J Unsal, D.O., Collingswood, NJ  
 Krishna Prasad Uppu, M.D., Tallahassee, FL  
 Melissa Urquhart, M.D., Crestline, CA  
 Hortensia Valeron, M.D., Miami, FL  
 Vincent Vallera, M.D., Woodbury, MN  
 Ravi Valluripalli, M.D., Chicago, IL  
 Mary Chen Vance, M.D., Ypsilanti, MI  
 Adriana Vannucci, M.D., Niskayuna, NY  
 Archana Varma, M.D., Baltimore, MD  
 Amanda Vastag, M.D., Peoria, IL  
 Arvind Harold Vaz, M.D., Nashville, TN  
 Keerthi Vejerla, M.B.B.S., Slc, UT  
 Carlos Enrique Velez, M.D., San Antonio, TX  
 Pedro L Velez Gonzalez, M.D., Isabela, PR  
 Renuka Velisetty, M.D., Sioux Falls, SD  
 Ann Verma, M.D., Pullman, WA  
 David Vernikov, M.D., Olathe, KS  
 Martin Wilhelm Vetter, M.D., Cambridge, MA  
 Sandra Sarah Vexler, M.D., El Paso, TX  
 Steven Ryan Vidrine, M.D., San Francisco, CA  
 Beatriz Liliana Villafane, M.D., Miami Lakes, FL  
 Maegen S Vincent, M.D., New Orleans, LA  
 Parth Mohanbhai Viroja, M.B.B.S., Wilmington, DE  
 Miguel Lorenzo Visbal, M.D., Brooklyn, NY  
 Lan Chi Le Vo, M.D., New York, NY  
 Boris Voinov, M.D., Nashville, TN  
 Ksenia Voronina, M.D., Seattle, WA  
 Thien-Huong T Vu, M.D., Long Beach, CA  
 Amy Vyas, M.D., Houston, TX  
 Cynetta Latrice Wade, D.O., Taylors, SC  
 Mufida Wadhwanian, M.D., Decatur, GA  
 Gerhardt Stefan Wagner, M.D., Halfmoon, NY  
 Melissa Wagner-Schuman, M.D., Chicago, IL  
 Jonathan Wai, M.D., Long Island City, NY  
 Daniel Isaac Waldman, M.D., New Orleans, LA  
 Courtney J Walker, D.O., Gibsonia, PA  
 Felicia L Walker, M.D., Durham, NC  
 James Walker, M.D., Charleston, SC  
 Leah Walker, M.D., Arlington, VA  
 Michael Walker, M.D., Philadelphia, PA  
 Kathryn Walseman, M.D., Annandale, VA  
 Emily R Walz, M.D., Madison, WI  
 Cecilia Saixi Wang, M.D., Wayne, NJ  
 Haiyan Wang, M.D., New York, NY

|                                                    |                                              |
|----------------------------------------------------|----------------------------------------------|
| Zhenni Wang, M.D., Milwaukie, OR                   | Harold A. Woodcome 111, M.D., Providence, RI |
| Christine F. Ward, D.O., Douglasville, GA          | Jessica Woodman, M.D., New York, NY          |
| Michael Warden, D.O., Salt Lake City, UT           | Ashley Woolbert, M.D., Plano, TX             |
| Scott Warhit, M.D., Woodmere, NY                   | Karen Michal Wooten, M.D., Washington, DC    |
| Saima Warraich, M.B.B.S., College Park, MD         | Ayofemi Wright, D.O., Charlotte, NC          |
| Chase Warren, M.D., Santa Barbara, CA              | Zeshen Wu, M.D., Houston, TX                 |
| Andrea Weber, M.D., Solon, IA                      | Rachel Wurmser, M.D., New York, NY           |
| Michael O'Brien Weeks, M.D., Kenmore, WA           | Daniel Wurzelmann, M.D., Durham, NC          |
| Anna Rachel Weissman, M.D., Washington, DC         | Lavanya Wusirika, M.D., Los Angeles, CA      |
| Cornell Wells, M.D., Los Angeles, CA               | Bob Wynn, M.D., Portland, OR                 |
| Gengyun Wen Mr., M.B.B.S., Tolland, CT             | Jiping Xiao, M.B.B.S., Charlotte, NC         |
| Jacynda Louise Wheeler, D.O., Anacortes, WA        | Rong Xiao, M.D., Salt Lake City, UT          |
| Fara R White, M.D., New York, NY                   | Biling Xu, M.D., Louisville, KY              |
| Keith Anthony White, M.D., Johnson City, TN        | Richa Yadav, M.B.B.S., Wilmington, DE        |
| Rebecca White, M.D., Chinle, AZ                    | Raisa Yagudayeva, D.O., San Diego, CA        |
| Lora Wichser, M.D., Minneapolis, MN                | Nancy Yan, D.O., Reno, NV                    |
| Brannon Elizabeth Wiedemann, M.D., New Orleans, LA | Chien Shien Yang, M.D., Emeryville, CA       |
| Zev Wiener, M.D., Los Angeles, CA                  | Thomas C. Yang, M.D., Port Washington, NY    |
| Elijah Bryan Wilder, D.O., Cincinnati, OH          | Yana Yanovskaya, M.D., Clovis, CA            |
| Brittany C Williams, D.O., Cincinnati, OH          | Xiaoyi Sherry Yao, M.D., New York, NY        |
| Julie Abbott Williams, M.D., Houston, TX           | Scott Matthew Yapo, M.D., Brookline, MA      |
| Crystal Wilson, M.D., Tampa, FL                    | Sahab Yaqubi, M.D., New York, NY             |
| Jacob Joseph Wilson, M.D., Edina, MN               | Arkadiy Yaretskiy, M.D., San Francisco, CA   |
| Joshua Lynn Wilson, M.D., Glen Carbon, IL          | Stephanie Yarnell, M.D., New Haven, CT       |
| Saydra Wilson, M.D., El Dorado Hills, CA           | Christopher Y Yeh, M.D., Torrance, CA        |
| Nicole Wimberger, M.D., Bucksport, ME              | Jennifer Yehl, M.D., Tampa, FL               |
| Bryce Wininger, M.D., Cambridge, MA                | Kiarash Yoosefi, M.D., Springfield, VA       |
| Daniel Witter, M.D., Gainesville, FL               | Weiqing Yuan, M.D., Clemmons, NC             |
| Nicholas John Wittry, M.D., Franklin, WI           | Farah Zaidi, M.B.B.S., San Mateo, CA         |
| Christine Wolfe, M.D., Charleston, SC              | Matthew Zak, MD, Eveleth, MN                 |
| Shucheng Wong, M.D., Boston, MA                    | Cassidy Erin Zanko, M.D., Los Angeles, CA    |

Paria Zarrinagar, M.D., Lake Oswego, OR  
Emily Marie Zarse, M.D., Indianapolis, IN  
Erika Kappes Zavyalov, D.O., Savannah, GA  
Zakaria Zayour, M.D., Irving, TX  
Amanda Zeglis, D.O., Columbia, MO  
Bradley J Zehring, D.O., Gilbert, AZ  
Fang Zhang, M.D., Stamford, CT  
Haogang Zhang, M.D., Forest Park, IL  
Xian Zhang, M.D., Ellicott City, MD  
Min Zhong, M.D., Houston, TX  
Rocksheng Zhong, M.D., New Haven, CT  
Raye Zhu, M.D., Chapel Hill, NC  
Rachel Alena Zhuk, M.D., New York, NY  
Anthony William Zoghbi, M.D., New York, NY  
Ankita Zutshi, M.B.B.S., Cincinnati, OH

## **Psych Med**

Mekabiz Abaian, M.D., Corona, CA  
Caitlin Adams, M.D., Boston, MA  
Jorge Aguilar-Zanatta, M.D., New Fairfield, CT  
Marie Rose Joseph Alam, M.D., Chevy Chase, MD  
Andrew Alkis, M.D., Winston Salem, NC  
Nicole Allen, MD, New York, NY  
Yadira Alonso, M.D., Boston, MA  
Eleanor Ainslie Anderson, M.D., Philadelphia, PA  
Michael Ang-Rabanes, M.D., Morgantown, WV  
Ahmad Yaseen Arain, M.B.B.S., Farmers Branch, TX  
Ricardo Luis Arribas Cruz, M.D., San Juan, PR  
Huma Yasmin Attari, M.D., Sacramento, CA  
Ngu Wah Aung, MD, Westlake, OH  
Reena Baharani, M.D., Stony Brook, NY

Mark Marlin Bahoura, M.D., Commerce Township, MI  
Andres Barrera, M.D., Doral, FL  
Elyssa Barron, M.D., Bronx, NY  
Katherine Blackwell, M.D., Rocky Hill, CT  
Margarita Bobonis Babilonia, M.D., Tampa, FL  
Frederick Austin Boyer, D.O., Atlanta, GA  
Jennifer Rebecca Breitbart, M.D., Los Angeles, CA  
Laura Brogoch, M.D., Portland, OR  
Melissa Park Bui, M.D., Lynchburg, VA  
Katrina E. Burns, M.D., Chicago, IL  
Kimothi Cain, M.D., Albuquerque, NM  
Angela M Camacho-Duran, M.D., Gainesville, FL  
Ulas Mehmet Camsari, M.D., Rochester, MN  
Richard H Carlson, M.D., Spokane, WA  
Mario Andres Caro Sabogal, M.D., West Hartford, CT  
Amanda Nicole Carrera-Alvarez, M.D., New York, NY  
Carmen Elizabeth Casasnovas, M.D., New York, NY  
Ann Chandy, M.D., Philadelphia, PA  
Monika Chaudhry, M.D., Los Angeles, CA  
Deanna Chaukos, M.D., Toronto, ON  
Kaleena Chilcote, M.D., Pittsburgh, PA  
Raymond Chiong, D.O., Valhalla, NY  
Kimber-Lynne Conger, M.D., Denver, CO  
Adam Roy Critchfield, M.D., New York, NY  
Bridgid Crowley, M.D., Tacoma, WA  
Roberto Antonio Cruz Barahona, M.D., New York, NY  
Renu Maria Culas, M.D., New York, NY  
Shaun Daniel Daidone, M.D., Denver, CO  
Patricia De Marco Centeno, M.D., Huntington Beach, CA  
Shivan Desai, M.D., Chesterfield, VA  
Aryeh Dienstag, M.D., Lawrence, NY

Stacy Marie Eagle, M.D., Port Jefferson Station, NY  
Jennifer Marie Erickson, D.O., Mercer Island, WA  
Fernando Espi Forcen, M.D., Chicago, IL  
Daniel Adrian Evans, M.D., Albuquerque, NM  
Morgan Faeder, M.D., Pittsburgh, PA  
Usama Feroze, M.B.B.S., Foxborough, MA  
David Freeman, M.D., Weaverville, NC  
Baiju Sudhir Gandhi, M.D., spring lake, NJ  
Inna Garber, D.O., Richmond, VA  
Renee Michelle Garcia, M.D., Covina, CA  
Liliya Gershengoren, M.D., New York, NY  
Clifford Alexander Gimenez, M.D., Woodland Hills, CA  
Yankel Joseph Girshman, D.O., Boca Raton, FL  
Roberta Maria Guimaraes De Oliveira, MD, New York, NY  
Nathan Russell Harper, M.D., Washington, NC  
Marta Herschkopf, M.D., New York, NY  
Pochu Ho, M.D., Westport, CT  
Troy Colston Hoff, D.O., Park City, UT  
Charlotte Scott Hogan, M.D., Boston, MA  
Emily Holmes, M.D., Indianapolis, IN  
Patrick Chang Hou, M.D., Brooklyn, NY  
Jennifer Bianca Howse, M.D., Kingwood, TX  
Saira Hussain, D.O., Glen Oaks, NY  
Catline Jacques, M.D., Woburn, MA  
Phillip Jones, M.D., Wake Forest, NC  
Pierre Luckner Joseph, MD, Rowlett, TX  
Lawrence Edward Kaplan, D.O., Berkeley, CA  
Naveed Riaz Khokhar, M.B.B.S., Beachwood, OH  
Swapnil Khurana, M.D., Cleveland, OH  
Hart Nicholas Kopple-Perry, D.O., New York, NY

Supriya Sharma Kothavale, D.O., Long Island City, NY  
Sarah Liesl Laughon, M.D., Chapel Hill, NC  
Elizabeth Leimbach, M.D., New York, NY  
Iga Marianna Lentowicz, M.D., Atlanta, GA  
Jacqueline Levin, M.D., Roslyn, NY  
Justin Lewin, M.D., New York, NY  
Max Alan Lichtenstein, M.D., New York, NY  
Sonja Lynn, D.O., Anchorage, AK  
Christopher R Martin, M.D., Harrisburg, PA  
Laura Maxwell, M.D., Durham, NC  
Veronica Miranda Lopez, M.D., San Juan, PR  
Omar F Mirza, D.O., New York, NY  
Alainia Morgan-James, M.D., Columbia, MD  
Darcy Moschenross, M.D., Pittsburgh, PA  
Aniceto Jose Navarro, M.D., Washington, DC  
Sharon D Neeman, M.D., Larchmont, NY  
Robina Hameed Niazi, M.D., Severna Park, MD  
Scott David Nichols, M.D., Chico, CA  
Mladen Nisavic, M.D., Boston, MA  
Kathryn Reynolds Norfleet, M.D., Asheville, NC  
Hande Okan, M.D., White Plains, NY  
Dora Orosz, M.D., Stamford, CT  
Aum Amar Pathare, M.B.B.S., Hershey, PA  
Ryan Peterson, M.D., Pittsburgh, PA  
Walter Piddoubny, M.D., Stony Brook, NY  
Rachel Poliquin, M.D., Durham, NC  
Vasthie Prudent, M.D., Miami, FL  
Geetha Reddy, M.D., Sacramento, CA  
Aizhan Tyndybekova Repchak, M.D., Falls Church, VA  
Xiomara de Los Angeles Rocha-Cadman, M.D., Old Greenwich, CT

Kamalika Roy, M.B.B.S., Wilsonville, OR  
Julia Margaret Ruark, M.D., M.P.H, Seattle, WA  
Beena Saad, M.D., New York, NY  
Reza Safavi, M.D., Hollywood, CA  
Annaheta Salajegheh, M.D., New York, NY  
Jessica Christine Samples, M.D., Nashville, TN  
Mariana Schmajuk, M.D., Menlo Park, CA  
Paul Edrick Schutt, M.D., San Mateo, CA  
Olusola Segun, M.B.B.S., Staten Island, NY  
Raymond Serrano, M.D., Portland, ME  
Mehak Sharma, M.D., New York, NY  
Neeta Shenai, M.D., Pittsburgh, PA  
Holly Shiao, M.D., Chicago, IL  
Sharvari Pradip Shivaneekar, M.B.B.S., Pittsburgh, PA  
Rachel Shmuts, D.O., Cherry Hill, NJ  
Simon Sidelnik, M.D., Brooklyn, NY  
Andrew Michael Siegel, M.D., Philadelphia, PA  
Fernando Bienvenido Silvestre, M.D., Lake Mary, FL  
Samira Solomon, M.D., West Hartford, CT  
Nathaniel Sowa, M.D., Clifford, MI  
Jason Tatreau, M.D., Chapel Hill, NC  
Ketty Thertus, M.D., Madison, WI  
Shruti A. Tiwari Ms., M.D., Rego Park, NY  
Samidha Tripathi, M.B.B.S., Little Rock, AR  
Justin Uzl, M.D., West Hartford, CT  
Emiliano Valles, M.D., Albuquerque, NM  
Robin E Valpey, M.D., Pittsburgh, PA  
David Van Norstrand, M.D., Somerville, MA  
Rubiahna Vaughn, M.D., New York, NY  
Rushi Hasmukh Vyas, M.D., Yorktown, VA  
Luke White, M.D., Redwood City, CA

Alan Charles Yancovitch, M.D., Bronx, NY  
Beth Rachel Zell, D.O., Teaneck, NJ  
Aleksandr Zverinskiy, M.D., Brooklyn, NY

### **Psych Med MOC**

Hideki Paul Chin, M.D., San Francisco, CA  
Kelly Lynn Cozza, M.D., Potomac, MD  
Leo Antiga Dela Cruz, M.D., Fairview, NJ  
David Conway Des Jarlais, M.D., Honolulu, HI  
Mary Jo Juneau Fitz-Gerald, M.D., Shreveport, LA  
Yakov Gertsberg, M.D., Chicago, IL  
Kristina Leslie Jones, M.D., New York, NY  
Suzanne Kennedy, M.D., FRCPC, Colchester, VT  
Donald John Kushon, M.D., Philadelphia, PA  
Edwin Sugin Meresh, M.D., Chicago, IL  
Maryland Pao, M.D., Bethesda, MD  
Tejaskumar Babulal Patel, M.D., Oro Valley, AZ  
Kemuel Luke Philbrick, M.D., Rochester, MN  
Donald Lee Rosenstein, M.D., Chapel Hill, NC  
Lillian Y. Segarra, M.D., San Juan, PR  
Jonathan Allen Slater, M.D., Hastings On Hudson, NY  
Edward R. Sodaro Jr., M.D., Amityville, NY  
Paul Summergrad, M.D., Boston, MA  
Henry W. Jonathan Weisman, M.D., El Paso, TX  
Christopher Michael Stewart, M.D., Oak Park, IL

### **Psych MOC**

Patricia Marie Abbott, M.D., Newtonville, MA  
Ibrahim A. Abi-Rafeh, M.D., Pembroke Pines, FL  
Kristen Marie Adashi, M.D., Baltimore, MD  
Rudolph Aldo Agosti, M.D., Natick, MA

Jyoti Agrawal, M.D., Marlboro, NJ  
Davin Anthony Agustines, D.O., Encino, CA  
Rukhsana Ahmad, M.D., Roswell, GA  
Tanveer Ahmed, M.D., New York, NY  
Melanie Garcia Akalal, M.D., Brentwood, CA  
Nelda F. Akinbile, M.D., Oak Brook, IL  
Benjamin Chukwuka Akosa, M.D., Gainesville, GA  
Mudassir Syed Ali, M.D., San Ramon, CA  
Charlisa Allen, M.D., Scottsdale, AZ  
Thomas William Allen, M.D., Chicago, IL  
Kristin Allison, M.D., Montgomery, NY  
Ramon Alvarez-Leonardo, M.D., Riverside, IL  
Amit Anand, M.D., Pepper Pike, OH  
Richard Howard Anderson, M.D. Ph.D., Weldon Spring, MO  
Smita Xerxes Antia, M.D., Burlington, NJ  
Albert Joseph Arias, M.D., Woodbridge, CT  
Bernardo J. Arias, M.D., Port Charlotte, FL  
Jeffrey Scott Aronowitz, M.D., Watertown, NY  
Vinay Arya, M.D., South Amboy, NJ  
Sherif Aziz, M.D., Rancho Cucamonga, CA  
Geoffrey Michael Bader, M.D., Salem, VA  
Wendy Miles Baer, M.D., Atlanta, GA  
Sudha Bakshi, M.D., Penfield, NY  
Lev Basin, M.D., San Carlos, CA  
Joseph H. Baskin, M.D., Beachwood, OH  
Deanna Lynne Bass, M.D., Minneapolis, MN  
Margaret Henderson Basu, M.D., Houston, TX  
Alicia Bond Batson, M.D., Whites Creek, TN  
Srinivas Battula, M.D., Wildwood, MO  
Carl Alan Baum, M.D., Spokane, WA

Mark Douglas Beale, M.D., Charleston, SC  
Warren Alan Becker, D.O., J.D., Albany, NY  
Mariam Bekhit, M.D., East Brunswick, NJ  
Lilian S. Belman, M.D., Brooklyn, NY  
David Candelaria Belmonte, M.D., Ann Arbor, MI  
Robert Wesley Benigar, M.D., Frisco, TX  
Stephanie Lisa Berg, M.D., Columbia, SC  
Vicki Lynn Berkus, M.D., Ph.D., Corona Del Mar, CA  
Scott Irwin Berman, M.D., Allentown, PA  
Emily Besser, M.D., Greenwood Village, CO  
Louai A. Bilal, M.D., Union City, CA  
Gennadii Bilitch, M.D., Brooklyn, NY  
Lyndra Jewell Bills, M.D., Camp Hill, PA  
Joseph William Bishop, M.D., Atlanta, GA  
Anthony Lee Blanford, M.D., Anchorage, AK  
Marjorie Ann Blieka, M.D., Syosset, NY  
Jennifer Blum, M.D., Metuchen, NJ  
Camelia Nicoleta Bodea-Crisan, M.D., Albertson, NY  
Shelley Kathryn Boehm-Mattia, M.D., Green Bay, WI  
Bettina Ute Bohle-Frankel, M.D., Wilmette, IL  
Rajshree Namdeorao Bongale, M.D., Saratoga, CA  
Paul Roger Borghesani, M.D., Ph.D., Seattle, WA  
Andrej Brajovic, M.D., Oakville, ON  
Chantal M.L.R. Brazeau, M.D., Montclair, NJ  
Neff Russell Breen, M.D., Portland, OR  
Sara Anne Brewer, M.D., Northampton, MA  
Odalys Brito, M.D., Jacksonville, FL  
Karen Shields Brown, M.D., San Diego, CA  
Yates Russell Brown, M.D., San Francisco, CA  
Travis Osborne Bruce, M.D., APO, AE  
Mary Frances Brunette, M.D., Concord, NH



Phyllis Marie Bryant-Mobley, M.D., Blythewood, SC  
Craig E. Buckles, M.D., Anderson, IN  
Anthony John Burlay, M.D., Pensacola, FL  
Roger Dale Burress, M.D., Oak Ridge, TN  
Marina Bussel, M.D., Los Angeles, CA  
Walter Robertson Butler, M.D., Louisville, KY  
Jean Rankin Butterfield, M.D., Milton, MA  
David Buttross III, M.D., Lake Charles, LA  
Mary Ellen Caiati, M.D., Denver, CO  
Julio Gonzalez Calderon, M.D., Miami, FL  
Rohana Priyanka Calnaido, M.D., Vancouver, WA  
Alvaro Camacho, M.D., Imperial, CA  
Melissa Maryn Campbell, M.D., Phoenix, AZ  
Michael Cannella, M.D., West Orange, NJ  
Anthony Capozzi, M.D., Port Orange, FL  
Biljana Capra, M.D., Minneapolis, MN  
Lisa Rosina Carchedi, M.D., Havre de Grace, MD  
Teri Lynn Carlson, M.D., Superior, CO  
Sarah Marie Centeno, M.D., Kentfield, CA  
Andrew Chih-Hui Chen, M.D., Ph.D., Brooklyn, NY  
Jim Chih-Hsien Chen, M.D., Bellevue, WA  
Javed Akhter Choudhry, M.D., Columbia, MO  
Natasha H. Chriss, M.D., New York, NY  
Patrick William Clapper, M.D., University Place, WA  
William Luther Clayton III, M.D., Tacoma, WA  
Kelly Thomas Clouse, M.D., Tallahassee, FL  
John Michael Cobb, M.D., Lubbock, TX  
Michelle Rena Macht Cochran, M.D., Nashville, TN  
Roel Demesa Compendio, M.D., Malvern, PA  
Margaret Anne Conolly, M.D., Uvalde, TX  
Andrew Todd Cooley, M.D., Lexington, KY

Victoria L. Cressman, M.D., Chappaqua, NY  
Napoleon Ma. S. Cuenco Jr., M.D., Galax, VA  
Klara Ildiko Curtis, M.D., Chesterfield, MO  
Nana Esi Kwansema Dadson, M.D., Lenexa, KS  
Anne Virginia Dall, M.D., Lebanon, PA  
Joseph Patrick Damore Jr., M.D., Bedford Hills, NY  
Laura Jordan Dardashti, M.D., Santa Ana, CA  
Charles DeBattista, M.D., Half Moon Bay, CA  
Michael Kent Delano, M.D., Sykesville, MD  
Ioana Madalina Diaconu, M.D., Kirkland, WA  
Joseph David Dolansky, D.O., Fredericksburg, VA  
Quentin Richard Dolphin, M.D., Holldaysburg, PA  
Kobie Douglas, M.D., Flossmoor, IL  
Jon Winston Draud, M.D., Primm Springs, TN  
Elaine Cecilia Dresbach, M.D., Fallbrook, CA  
Benjamin George Druss, M.D., Atlanta, GA  
David Laurence Duncan, M.D., Dulles, VA  
Christopher L. Eaton, M.D., San Rafael, CA  
Thomas Andrew Ebeling, M.D., Richmond, VA  
Suzy William Ebrahim, M.D., Belton, TX  
Jason Chad Ehret, M.D., Carmel, IN  
Alaa Elhaj, M.D., Berkeley, CA  
Harold Walker Elliott, M.D., Fuquay-Varina, NC  
Michael John Enenbach, M.D., West Hollywood, CA  
Joseph Ronald Errico, M.D., Vinita, OK  
Roberto Estrada, M.D., New York, NY  
Ari Urakubo Etheridge, M.D., El Granada, CA  
Khaja Tajuddin Faisal, M.D., West Windsor, NJ  
Xiaoduo Fan, M.D., Andover, MA  
Rebecca Ann Farinas, M.D., Jacksonville, FL  
Tasha Michele Farrar, M.D., Menasha, WI

Lisa Rosemary Fazzolari, D.O., Oakland, CA  
 Eve Ariel Samuels Fields, M.D., Greenville, SC  
 Ernesto F. Figueroa, M.D., Ann Arbor, MI  
 Sara Reddig Figueroa, M.D., Ann Arbor, MI  
 Ryan Dale Finkenbine, M.D., Peoria, IL  
 David Alan Fohrman, M.D., Fort Collins, CO  
 Peggy Marriott Forbes, M.D., Roswell, GA  
 Kimberly Sue Ford, M.D., Mechanicsburg, PA  
 Fredrick L. Fox, M.D., San Antonio, TX  
 Charles J. Franchino, M.D., Plantation, FL  
 Douglas Holmes Fraser, M.D., Pensacola, FL  
 Robert Benson Freele Jr., M.D., Dallas, TX  
 Brenda Kaye Freeman, M.D., Pittsburgh, PA  
 Mark Andrew Frye, M.D., Rochester, MN  
 Lara R. Fuchs, M.D., Saint Louis, MO  
 Benjamin Albert Furst, M.D., Torrance, CA  
 Rise Ann Futterer, M.D., Madison, WI  
 Andrey Gagarin, M.D., Newton, MA  
 Alberto Issa Garmo, M.D., Franklin, MI  
 Dorota Gawlas, M.D., Concord, NC  
 Ora Ellen Gelb, M.D., Bedford, NY  
 Kendall Leigh Genre, M.D., New Orleans, LA  
 A. Susan George, M.D., Bloomfield Hills, MI  
 Erica Kate German, M.D., Scarsdale, NY  
 Douglas Alan Ghrist, M.D., Tyler, TX  
 Raquel Maria Gil, M.D., Niskayuna, NY  
 Paramjit K. Gill, M.D., Stockton, CA  
 Heather Nell Gillum, M.D., Amherst, NH  
 Sonia Abhyanker Godbole, M.D., Phoenix, AZ  
 Rosalind Gold, M.D., Portland, ME  
 Margaret Goni, M.D., Brooklyn, NY  
 Miguel A.C. Gonzalez, M.D., Chula Vista, CA  
 Kathleen Anne Goyne, M.D., Cleveland, TN  
 Adrian Grant, M.D., Berkeley, CA  
 Miggie Lindsay Greenberg, M.D., Saint Louis, MO  
 Kristyn Marie Gregory, D.O., Washington, MI  
 Shara Grover, M.D., Mukwonago, WI  
 Jennifer Suzanne Gunther, M.D., Tucson, AZ  
 Charlotte Hagan, M.D., Fincastle, VA  
 Ann Lucinda Hammon, M.D., Phoenix, AZ  
 Nancy Dafashy Hanna, M.D., Seabrook, TX  
 Wendy A. Harris, M.D., Armonk, NY  
 Elisabeth A. Hasslacher, M.D., Bala Cynwyd, PA  
 Chanel Marie Heermann, M.D., Lakewood, CO  
 Delia Cimpean Hendrick, M.D., Lyme, NH  
 Daniel Gustavo Herrera, M.D., Ph.D., Watertown, MA  
 Joshua Adam Hersh, M.D., Estero, FL  
 Kathy Jean Hickman, M.D., Austin, TX  
 Sharon Hird, M.D., New York, NY  
 Shelley Holmer, M.D., Durham, NC  
 Marcela Veronica Horvitz-Lennon, M.D., M.P.H.,  
 Watertown, MA  
 Ellen Mary Hott, M.D., Beachwood, OH  
 Wei-Li Hsu, D.O., San Francisco, CA  
 Peter Suway Huang, M.D., Gilroy, CA  
 Mary Jo Hughes, D.O., Delmar, NY  
 David Robert Hunter, M.D., Fulton, MO  
 Dan Octavian Ioanitescu, M.D., Warner Robins, GA  
 Krithika Sreedhar Iyer, M.D., Miramar, FL  
 James Norman Jacobson, M.D., Satellite Beach, FL  
 Ashish Jain, M.D., Crown Point, IN  
 Audrey Elaine Jain, D.O., Lakeland, FL

Satyam Jain, M.D., Wichita Falls, TX

Ramesh Jasti, M.D., New Albany, OH

Elizabeth Hubbard Jeffords, M.D., Columbia, SC

Jeffrey Fordham Johns, M.D., Berkeley, CA

Amy L. Johnson, M.D., New York, NY

Paul M. Jones, M.D., M.A.T., Washington, DC

Dara Anita Josiah-Howze, M.D., Noblesville, IN

Renata Izabela Jurczak, M.D., Pittsburgh, PA

David Alan Justice, M.D., Sumter, SC

Syeda Mahmuda Kabir, M.D., Folsom, CA

Deborah Sharon Kadish, M.D., Newton, MA

Arie Kaffman, M.D., Ph.D., Hamden, CT

Jeffrey Paul Kaiser, M.D., Seattle, WA

Manjula Bangalore Kallur, M.D., Roswell, GA

Douglas Alan Kalunian, M.D., Seattle, WA

Jayesh Kamath, M.D., PhD., Farmington, CT

Suad Kapetanovic, M.D., Los Angeles, CA

Lori E. Kaplowitz Beizer, M.D., Cambridge, MA

Marsha Tanenberg Karant, M.D., Centerport, NY

Richard John Kassner, M.D., New York, NY

Stanley Joshua Kaster, M.D., Brooklyn, NY

Daniel Ray Kauffman, M.D., Bethesda, MD

Iraida Y. Kazachkova, D.O., Brooklyn, NY

Salman Kazim, M.D., Rawalpindi, KR

Mahmood Mehdi Kazmi, M.D., Bronx, NY

Tanja Kees, M.D., North Chesterfield, VA

Eileen Kemether, M.D., P.C., New York, NY

David Eric Kemp, M.D., Downers Grove, IL

Marcia Davenport Kent, M.D., East Lansing, MI

Farah Khan, M.D., Los Altos, CA

Tasneem Ahmad Khan, M.D., Westport, CT

Kahnaz Khari, M.D., Anchorage, AK

Khurshid Ahmad Khurshid, M.D., Newberry, FL

Bernard Clement Kim, M.D., Austin, TX

Ryan James Kimmel, M.D., Seattle, WA

Yasmeen Kirmani, M.D., Westbury, NY

Ronald Morton Kirsner, M.D., Jacksonville, FL

Kory Joseph Knapke, M.D., West Hollywood, CA

Samantha Farrar Knowlton, M.D., Salt Point, NY

Cortney Anne Kohberger, M.D., Shaker Heights, OH

Meghan Suzanne Kolodziej, M.D., Waban, MA

Gopinath Kongara, M.D., Baton Rouge, LA

Daniel Jon Kostalnick, M.D., Livermore, CA

Vijaya Gopal Kotha, M.D., Grosse Pointe Woods, MI

Jack Steven Krasuski, M.D., Hinsdale, IL

Brinda Shree Krishnan, M.D., Santa Cruz, CA

Inna Kruk, M.D., Allston, MA

Sayali Abhijit Kulkarni, M.D., Salt Lake City, UT

Neeru Asthana Kumar, M.D., Fremont, CA

Eva Kurilo, M.D., Bartlett, IL

Mark Edmund Ladner, M.D., Jackson, MS

Esther Langer, M.D., brooklyn, NY

Nhan Trang Le, M.D., Sachse, TX

Carolyn Renee Leavitt, M.D., Miami, FL

John Chuen-lou Lee, M.D., Midlothian, VA

Manisha Mohan Lele, M.D., Chesterfield, MO

Ubaldo Leli, M.D., New York, NY

Yevgeniy Aleksandrovich Lepler, M.D., Davis, CA

Ze-Ev Levin, M.D., New York, NY

Stuart Lewis Levinson, M.D., Huntingdon Valley, PA

Thomas Christopher Lian, M.D., Rancho Santa Fe, CA

Yulan Liao, M.D., San Francisco, CA

Rosalind Hweimei Lin, M.D., Chapel Hill, NC  
John Farrell Lines, M.D., Moorestown, NJ  
Xiaoqing Liu, M.D., Ph.D., Houston, TX  
Albert Charles Lo, M.D., Champaign, IL  
Eduardo Lopez-Gibson, M.D., San Diego, CA  
Angela Kay Louie, M.D., Matthews, NC  
Donna Luchetta, M.D., Lk In The Hls, IL  
Erik Kenneth Lundmark, M.D., San Antonio, TX  
David Roland Mack, M.D., Anchorage, AK  
William Joseph Mack, M.D., Leawood, KS  
Paul Lawrence Maguire, M.D., Dover, NH  
Thomas Alden Mak, M.D., Walnut, CA  
Kishor Malavade, M.D., Brooklyn, NY  
Jorge Luis Maldonado, M.D., San Antonio, TX  
Raafea Faiz Malik, M.D., Wildwood, MO  
Suzanne Mallouk, M.D., New York, NY  
John Robert Malloy, M.D., Randolph, VT  
Matthew Thomas Malone, D.O., Oro Valley, AZ  
Lynda R. Mandell, M.D., New York, NY  
Natalia Manevich, M.D., Riverside, CT  
Beatriz Lourdes B. Marfori, M.D., San Diego, CA  
JoAnne McManus Markle, M.D., Mountain View, CA  
Isis V Marrero, M.D., Tampa, FL  
Josh J. Mathew, M.D., Middlebury, IN  
Roger Mathew, M.D., Brooklyn, NY  
Kimberly Kristen Mathos, D.O., Freeport, PA  
Gregory Warren Mattingly, M.D., Saint Charles, MO  
Michael Lewis McClam, M.D., Missouri City, TX  
Kristoffer Gerard McCoy, M.D., Lafayette, LA  
Thomas Kevin McKean, M.D., Ph.D., Hickory, NC  
Darlene Warrick McLaughlin, M.D., Bryan, TX

Deena McRae, M.D., Orange, CA  
Manuel Augusto Melendez, M.D., Coral Gables, FL  
Anne Marie Hostetler Menahemy, M.D., Richmond, CA  
Amalia Merson, M.D., Jersey City, NJ  
Gnaneswara V. Midathala, M.D., Odessa, FL  
Joyce Regina Miller, M.D., Chicago, IL  
Carrie E. Milligan, M.D., Portland, OR  
Naveed Javaid Mirza, M.D., Poplar Bluff, MO  
Gana Maria Mody, M.D., Irvine, CA  
Ratnasri V. Mogallapu, M.D., Fenton, MO  
Nazimuddin Talha Mohammed, M.D., ALLEN, TX  
Madan Sudarshana Mohan, M.D., Jacksonville, FL  
Robert Bond Molpus, M.D., Orlando, FL  
Anthony Joseph Monteverdi, M.D., Bend, OR  
Brian Walter Mooney, M.D., Springdale, AR  
Barbara Ann Moore, M.D., Sugar Land, TX  
Vanessa K. Moore, M.D., The Woodlands, TX  
Joshua Chaim Morganstein, M.D., Silver Spring, MD  
David Lynwood Moulton, M.D., Salt Lake City, UT  
Louis Gerard Mudd, M.D., Bowling Green, KY  
Fiona Yvonne Mudge, M.D., Randolph, MA  
Ricardo A. Mujica, M.D., Westfield, MA  
Michael Stephen Nagy, M.D., Bedford, VA  
Ramzi Munir Nassar, M.D., Anchorage, AK  
Amita Sharma Nayyar, M.D., Camp Hill, PA  
Carver William Nebbe, M.D., Ames, IA  
Chan Nhu Nguyen, M.D., Morro Bay, CA  
Diane Phuong Nguyen, D.O., Lakeway, TX  
Cristobal Andres Nogues, M.D., Miami, FL  
Maria Laura Novas-Schmidt, M.D., Ph.D., Essex Junction, VT

Erica Lynne O'Neal, M.D., Duncan, BC  
Crystl Crawford Osborn, M.D., Port Charlotte, FL  
Vahid Osman, M.D., Carmel, IN  
Kyle Patrick Owen, D.O., Alamo, CA  
Kenneth Scott Ozdoba, M.D., Scarsdale, NY  
Julie Marie Pan, M.D., Los Angeles, CA  
Vincent Anthony Paolone, M.D., Boardman, OH  
Khatija Nadir Paperwalla, M.D., New York, NY  
Kwang-Hie Park, MD, Seattle, WA  
John David Pascoe, M.D., Dallas, TX  
James Joseph Paskowitz, M.D., Katy, TX  
Frank William Pavlovic III, D.O., Chelsea, MI  
Lori Pellegrino, M.D., New York, NY  
Omar Aradipson Pena, M.D., Astoria, NY  
Victoria Anne Petivan, M.D., Frenchtown, NJ  
Sonata Petraviciute, D.O., Brookhaven, NY  
Shonna Janel Piegari, M.D., Houston, TX  
Edward Charles Pierson, M.D., Columbiana, OH  
Daniel Nelson Pistone, M.D., San Jose, CA  
Richard Jay Pitch, M.D., Melville, NY  
Markus Ploesser, M.D., Vancouver, BC  
Lisa Rae Ponfick, M.D., Helena, MT  
Dennis Michael Popeo, M.D., New York, NY  
David Edward Post, M.D., Baton Rouge, LA  
Teodor T. Postolache, M.D., Silver Spring, MD  
Robert Edward Price, M.D., Diamond Springs, CA  
William Armistead Price, M.D., Durham, NC  
Amy Louise Prince, M.D., Sudbury, MA  
Brian Patrick Quigley, M.D., Morgantown, WV  
Julia Dawn Quinlan, D.O., San Antonio, TX  
Sudheera Rachamalla, M.D., Baton Rouge, LA

Almas Hayat Rahman, M.D., Chesterfield, MO  
Kazi Habibur Rahman, M.D., M.S., Valencia, CA  
Shahnaz Amer Rahman, M.D., Lake In The Hills, IL  
Namita Rajouria-Malla, M.D., Marietta, GA  
Usha Rani Ramineni, M.D., San Diego, CA  
Sujatha Ramkumar, M.D., Elk Grove, CA  
Lauren Beth Randel, M.D., Bethesda, MD  
Michelle Monfee Ransom, M.D., Little Rock, AR  
Vilayannur Rajaramachandra Rao, M.D., Princeton Junction, NJ  
Varinder Singh Rathore, M.D., Hopewell Junction, NY  
Vinutha Cherkupalli Reddy, M.D., Hilliard, OH  
Mark Owen Rester, M.D., Jackson, MS  
Jeremy Revell, M.D., Wilmington, NC  
John Forrest Rians, M.D., Little Rock, AR  
Susan Kausch Richter, M.D., Albany, NY  
Paul Michael Riskin, M.D., Los Angeles, CA  
Margaret E. Rittenbury, M.D., Johns Island, SC  
Mark Anthony Ritter, M.D. R.Ph., Crofton, MD  
George Dave Robinette II, M.D., Charlotte, NC  
Michelle Maria Robinson, M.D., Roseville, CA  
Leslie Dustin Rokoske, M.D., Arlington, VA  
Katia Susanna Ronay, M.D., EDMONDS, WA  
Paul Christopher Rosandich, M.D., Santa Ana, CA  
David Michael Rosenthal, M.D., Monroeville, PA  
Marie Elizabeth Rueve, M.D., Mason, OH  
Duke Ruktanonchai, M.D., Gibsonia, PA  
Alex Sahba, M.D., Los Angeles, CA  
Mazhar Salim, M.D., Corbin, KY  
David Salvage, M.D., New York, NY  
Julia Beth Samton, M.D., New York, NY

Pablo Sanchez-Barranco, M.D., Sleepy Hollow, NY  
Robert Gary Sarrazin, M.D., Nixa, MO  
Anjan Kazi Sattar, M.D., Olympia, WA  
Mary Ellen Savage, M.D., New Haven, CT  
Daniel Scott Schechter, M.D., Geneva, \_BA  
Craig Jerome Schoenecker, M.D., Madison, WI  
Eileen Meryl Schwartz, M.D., Canton, OH  
Eric Howard Schwartz, M.D., Davis, CA  
Nicholas Allen Schwartz, M.D., Brooklyn, NY  
Patricia Meredith Schwartz, M.D., Scarsdale, NY  
Marisa Serrato, M.D., Chicago, IL  
Saeed Ahmad Shah, M.D., Montgomery, AL  
Shabnam Shakibaie Smith, M.D., New York, NY  
Robin J. Shapiro, M.D., Highland Park, IL  
Gautam Sharma, M.D., Naperville, IL  
Parvesh Kumar Sharma, M.D., Montebello, NY  
Suhail Jawaid Sheikh, M.D., Mountain View, CA  
Tasmina Sheikh, M.D., Palm Beach Gardens, FL  
Toshiyuki Shibata, M.D., Honolulu, HI  
James Walter Sholtz, M.D., Covington, LA  
Vikram Rasiklal Shukla, M.D., Gastonia, NC  
Lisa Elaine Siegel, M.D., Chicago, IL  
Mark Fletcher Simonds, M.D., Los Angeles, CA  
Brian Rush Simpson, M.D., Little Rock, AR  
Helen Blair Simpson, M.D. Ph.D., New York, NY  
Farid Singh, M.D., Oakville, ON  
Sunita Singh, M.D., Murphy, TX  
Brian Perry Skop, M.D., San Antonio, TX  
William David Slaughter, M.D., Cambridge, MA  
Terry Martin Smith, M.D., Burlington, MA  
Rebecca Marie Smullen, M.D., Suffolk, VA

Joe Speer, M.D., Broken Arrow, OK  
Shane S. Spicer, M.D., New York, NY  
Elizabeth Anne Springer, M.D., San Francisco, CA  
Luz C. Starck, M.D., Steilacoom, WA  
Stephanie Denise Stevenson, M.D., Detroit, MI  
Jason Richard Stone, M.D., Portland, OR  
Steven Charles Stout, M.D., Ph.D., Minneapolis, MN  
Kurt Chester Stuebben, M.D., Hillsborough, NJ  
Todd Willis Stull, M.D., Omaha, NE  
Elizabeth Adrienne Stuller, M.D., Baltimore, MD  
Thambipillai Sureshkumar, M.D., Lafayette Hill, PA  
Anton Agus Subuh Surja, M.D., Tulsa, OK  
Sanmukan Surulinathan, M.D., Stockton, CA  
Barbara Christina Swarzenski, M.D., Kensington, CA  
Shaad Swim, D.O., Norwalk, IA  
Uqbah Taksh, M.D., San Bernardino, CA  
Venkat B. Talasila, M.D., Bay City, MI  
Anthony Soon Aun Tan, M.D., Bellflower, CA  
Emjay Meng-Jiao Tan, M.D., Daly City, CA  
Isabella Oh Tcaciuc, M.D., Salt Lake City, UT  
Ece Tek, M.D., Woodbridge, CT  
Damilya L. Tell, M.D., Beachwood, OH  
Amanda Joy Templeton, M.D., Napa, CA  
Vinh Quoc Thai, M.D., Palo Alto, CA  
Ramesh Kumar Thapar, M.D., Potomac, MD  
Neil Allen Thierry, M.D., Riverview, FL  
Jessica Marie Thompson, M.D., Austin, TX  
Joseph Earl Thompson, M.D., Stone Mountain, GA  
Dominique Alexis Thuriere, M.D., Gulfport, FL  
Eden Temko Tobar, D.O., Rockville, MD  
Thao Hai Tran, M.D., San Francisco, CA

Andrew Aaron Trauben, M.D., New York, NY  
Karen Elizabeth Trevisan, M.D., Sudbury, MA  
Nhi-Ha Thuy Trinh, M.D., M.P.H., Cambridge, MA  
Eduardo Dumlao Trinidad, M.D., Minneapolis, MN  
Edward McDaniel Turpin Jr., M.D., Decatur, AL  
Gita Vaid, M.D., New York, NY  
Mary Beth Valiulis, M.D., Shreveport, LA  
Yelena Vanina, M.D., Prospect, KY  
Maria A. Velazquez, M.D., Reading, PA  
Angela Maria Velez, M.D., Shavano Park, TX  
Elena A. Verbitsky, M.D., Newton, MA  
Cherian Verghese, M.D., Norristown, PA  
Porfirio Fagutao Villarín, M.D., New York, NY  
Jean Ellen Vogel, M.D., Southbury, CT  
Kathleen Drebes Voras, M.D., Arnold, MO  
Manisha Wadhwa, M.D., Newark, DE  
Christina G Waite, M.D., Xenia, OH  
Brent John Walta, M.D., San Luis Obispo, CA  
Amy Elise Walton, M.D., Austin, TX  
Katherine Warburton, D.O., Napa, CA  
Veda Warriar, M.D., Dublin, OH  
Adella Thereasa Wasserstein, M.D., Pepper Pike, OH  
Lisa Sundeen Weinstock, M.D., Katonah, NY  
Lydia Ellis Weisser, D.O., Columbia, SC  
Thomas Louis Welch, M.D., Ridgeland, MS  
Christopher Alan Welsh, M.D., Iowa City, IA  
Patrick T. Wheat, M.D., Natchitoches, LA  
Patricia M. Ferrie Widra, M.D., Washington, DC  
Neil Lloyd Wilkey, M.D., Austin, TX  
Jeffrey Scott Winseman, M.D., Albany, NY  
Barbara Virginia Wise, M.D., Fayetteville, NC

William Joseph Wiseman, M.D., Greenwood, IN  
Casey Helmkamp Wolf, M.D., Denver, CO  
Cheryl Mei Han Wong, M.D., Totowa, NJ  
Glen Alan Wright, M.D., Charleston, WV  
Megan Cathleen Wynne, M.D., Parnell, Auckland, n/a  
Peter Y. Yamamoto, M.D., Honolulu, HI  
Laila Yasmin, M.D., Poughkeepsie, NY  
Jean Shann-Ching Ying-Chang, M.D., Flanders, NJ  
Norma Helen Yohai, M.D., Danville, PA  
Keith William Young, M.D., Los Angeles, CA  
Adel Sleiman Zaraa, M.D., Akron, OH  
Gratiela Elena Zbarcea, M.D., North Potomac, MD  
Paula Lynn Zebrowski, M.D., Syracuse, NY  
Robert Anthony Zepf, M.D., Rocky Hill, CT  
Lauretta Anne Ziajko, M.D., San Diego, CA  
Shakil Zubair, M.D., East Meadow, NY  
Marcia L. Zuckerman, M.D., Charlestown, MA  
Ronee Aaron, D.O., Hendersonville, NC  
Imran Muhammad Abassi, M.D., Ashburn, VA  
Christopher Alan Adams, M.D., Louisville, KY  
Rachel Alison Adcock, M.D., Ph.D., Durham, NC  
Rajasekhar Venkata Addepalli, M.D., Rego Park, NY  
Devon Kimberly Addonizio, M.D., Ossining, NY  
Oladele Adepitan Adebogun, MD, FAPA., Flower Mound, TX  
Oluwafemi Adeyemo, M.D., San Jacinto, CA  
Nazila Adib, M.D., Phoenix, AZ  
Abdelmonim Affany, M.D., Fresno, CA  
Mark George Agresti, M.D., Palm Beach, FL  
Kalu Ndu Boniface Agwu, M.D., Pomona, NY  
Anwarul Ahad, M.D., M.P.H., Brooklyn, NY

Yousuf Ahmad, M.D., Waterford, NY  
Hamayun N. Ahmed, M.D., Allentown, PA  
Oluyemi Aina, M.D., Sherman, TX  
Nadeem Akhtar, M.D., Winston Salem, NC  
Eric Cortez Alcera, M.D., Point Pleasant Beach, NJ  
Benjamin Schrock Alderfer, M.D., Denver, CO  
Jane Leslie Algus, M.D., New York, NY  
Jeffrey Asgar Ali, M.D., Ridgeland, MS  
Mohsin Ali, M.D., Chattanooga, TN  
Zaffar Ali, M.D., Richmond, VA  
John Menelaos Aliapoulos, M.D., Palm Desert, CA  
Lalitha Alla, M.D., Alexandria, LA  
Shirley Diana Angela Alleyne, M.B.B.S., Jacksonville, FL  
Orna Alpert, M.D., Somerset, NJ  
Jacqueline Marie Amato, M.D., Medford, OR  
Paul Thomas Amble, M.D., Guilford, CT  
Seeba Anam, M.D., Chicago, IL  
Beena Anantharaman, M.D., newbury park, CA  
Donald Robert Anderson, M.D., Estacada, OR  
Susan S. Anderson, M.D., Northfield, IL  
Carmen Andreescu, M.D., Pittsburgh, PA  
Lourdes Bernadette Angeles, M.D., Dearborn, MI  
Padmaja Annamaneni, M.D., East Brunswick, NJ  
Jan Ellen Apple, M.D., Minnetonka, MN  
Jose Antonio Apud, M.D., Fairfax, VA  
Sepideh Sahar Aram, M.D., New Haven, CT  
Belito Jex Arana, M.D., MRCPsych, Buffalo, NY  
David Brian Arciniegas, M.D., Crested Butte, CO  
Francis Bartholomew Armao, M.D., Winslow, AZ  
Romulo Alcalde Aromin Jr., M.D., New York, NY  
Afshan Ashai, M.D., Ellicott City, MD

Robert Vinh Ashley, M.D., Los Angeles, CA  
Roy Oon Asta, M.D., Madison, TN  
Jasdeep Singh Aulakh, M.D., Patton, CA  
Faisal Awadalla Awadelkarim, M.D., Glen Allen, VA  
Zahid Awan, M.D., Wyomissing, PA  
Ali Sayed Aziz, M.D., Glen Cove, NY  
Tarek M Aziz, M.D., Logan, OH  
Young Hoon Bae, M.D., Fairfax, VA  
Steven Christopher Bagley, M.D., Stanford, CA  
Bhagwan Assumal Bahroo, M.D., McLean, VA  
Christopher Franklin Bailey, M.D., Lake Forest Park, WA  
Khalid M. Bajwa, M.D., Sewell, NJ  
Anusuya Balasundaram, M.D., Philadelphia, PA  
Jennifer R. Ballew, D.O., Ph.D., Cheshire, CT  
Srihari Srinivasan Bangalore, M.D., M.P.H., Granite Bay, CA  
Sophia Banu, M.D., Houston, TX  
Leah Fennell Barahona, M.D., North Charleston, SC  
Henry Claude Barbot, M.D., Upper Marlboro, MD  
Anne Renee Barnes, M.D., Portland, OR  
Steven Paul Barnett, M.D., Santa Barbara, CA  
Carlos Enrique Barrios, M.D., Santa Barbara, CA  
Victoria Baskin, M.D., Fort Lauderdale, FL  
Robert Louis Bauer, D.O., Fort Gratiot, MI  
Matthew Arthur Bayer, M.D., Sherwood, WI  
Kevin Glenn Bays, M.D., Louisville, KY  
Mary Ellen Becker, M.D., Denver, CO  
Jyoti Behl, M.D., Greenbelt, MD  
Winona Zenobia T. Belmonte, M.D., Phoenix, AZ  
David Manfred Benedek, M.D., Clarksville, MD  
Richard Gordon Bennett, M.D., Williamsville, NY



Margaret McCullough Benningfield, M.D., Nashville, TN  
Carolyn Margaret Benson, M.D., Jersey City, NJ  
Herbert Berger-Hershkowitz, M.D., Jamaica Plain, MA  
Arnaldo Adolfo Berges, M.D., Providence, RI  
Malaika Berkeley, M.D., Atlanta, GA  
Ileana Bernal-Schnatter, M.D., Scotch Plains, NJ  
Thomas Best, M.D., Sarasota, FL  
Farzana Mohsin Bharmal, M.D., Lilburn, GA  
Farrukh Latif Bhatti, M.D., Fort Worth, TX  
Matthew Graham Biel, M.D., Washington, DC  
Sherrie Bieniek, M.D., South Miami, FL  
Jeffrey Nelson Billett, M.D., Redlands, CA  
Anuranjan Bist, M.D., Las Vegas, NV  
Nancy Burgess Black, M.D., Washington, DC  
Constantin Boisrond-Canal, M.D., Dix Hills, NY  
Pamela Bokak, M.D., Cape Elizabeth, ME  
Robina Maqbool Bokhari, M.D., Somerset, KY  
Sara Manning Bolton, M.D., Concord, MA  
Brian Robert Bonfardin, M.D., Johnson City, TN  
Julie Christina Bonner, M.D., Palo Alto, CA  
Sarah Weiss Book, M.D., Charleston, SC  
Adam Michael Borah, M.D., Georgetown, TX  
Rebecca Ann Boucher, M.D., Tacoma, WA  
Susan Lynn Bower, M.D., Peachtree Corners, GA  
Susan Kathleen Boyer, M.D., Saint Louis, MO  
Aelred Boyle, M.D., Los Angeles, CA  
John Christopher Bradley, M.D., Hingham, MA  
Navpreet Singh Brar, M.D., Apex, NC  
Tara Lynn Brass, M.D., Scarsdale, NY  
John Michael Brennan, M.D., Dallas, TX  
Stephen Keith Brockway, M.D., San Francisco, CA

David William Brody, M.D., New York, NY  
Allegra Ivana Broft, M.D., New York, NY  
Alexis Deborah Brooks, M.D., Needham, MA  
Jody Lane Brown, M.D., Gainesville, FL  
Rachel Margaret Ann Brown, M.B.B.S., Columbia, MO  
Russell Edward Brown Jr., M.D., Marietta, GA  
Thomas Markham Brown, M.D., San Antonio, TX  
Dawn-Christi Marie Bruijnzeel, M.D., Gainesville, FL  
Benjamin Robert Bryan, M.D., New York, NY  
Frances S. Bryan, M.D., New Orleans, LA  
Marin Bucevic, M.D., Garden City, NY  
Janet Marian Buckner, M.D., Garden City, NY  
Anna Eirini Budayr, M.D., Orinda, CA  
Edmund Charles Burke Jr., M.D., Diamond, OH  
Maureen Sarah Burrows, M.D., Austin, TX  
Ashley Ian Bush, M.D., Ph.D., Parkville, VIC  
Matthew John Byerly, M.D., Bozeman, MT  
Joshua Villar Cabrera, M.D., Bryan, TX  
James Frederick Cahill Jr., M.D., Cornville, AZ  
Anne Oldshue Calabresi, M.D., Jamaica Plain, MA  
Alexandra Canetti Rochet, M.D., Ridgewood, NJ  
Paul Anthony Cannistraro, M.D., Cambridge, MA  
Richard James Capiola, M.D., Naples, FL  
Claudia Carcoana, M.D., Fargo, ND  
Laura Marie Carlson, M.D., Highland Park, IL  
Martin Wallace Carpenter, M.D., North Liberty, IA  
Corey Patrick Carr, M.D., Brookfield, WI  
Teresa De Jesus Carreno, M.D., Miami, FL  
David Winston Carrington, M.D., Ogden, UT  
Claire Griffin Carswell, M.D., Belmont, MA  
Paul Edward Carter, M.D., Chicago, IL

Vinneth Veronica Carvalho, M.D., Ivoryton, CT  
Laurie Rashidi Casaus, M.D., Los Angeles, CA  
Manolito V. Castillo, M.D., Fresno, CA  
Jorge Walter Castro, M.D., Birmingham, AL  
Rakesh Chadalavada, M.D., Richardson, TX  
Tamara Ann Chambless, M.D., Anaheim, CA  
Marni Joy Chanoff, M.D., Somerville, MA  
Carmen Desiree Chase, M.D., Bloomington, IL  
Catherine Edith Chase, D.O., Warren, RI  
Eric M. Chavez, M.D., San Diego, CA  
Lara Gayle Chepenik, M.D., Ph.D., New Haven, CT  
Pavil Thenamkodath Cherian, M.D., Chicago, IL  
Stephen J. Chernaik, M.D., Glencoe, IL  
Maciej Piotr Chodynicky, M.D., Baltimore, MD  
Lois Wonsun Choi-Kain, M.D., Lexington, MA  
A.S.M. Junnun Choudhury, M.D., Little Neck, NY  
Shabbir Ahmed Chowdhury, M.D., Fayetteville, NC  
James Benjamin Christenson, M.D., Minnetonka, MN  
Autumn Marie Clark, D.O., Springfield, MO  
Robert Gebhardt Clark, M.D., Aurora, CO  
Anne Nieder Clegg, M.D., Jericho, VT  
Michael Lawrence Cohen, M.D., Farmingdale, NY  
Sonia Lois Cole, M.D., Mount Vernon, NY  
Jeremy Huston Colley, M.D., New York, NY  
Amanda Denise Cook Zivic, M.D., Baltimore, MD  
Marina Jean Cooney, M.D., Drexel Hill, PA  
David Adam Cooperman, M.D., New York, NY  
Michael Andrew Corbin, M.D., Ft Lauderdale, FL  
Terry Lee Correll, D.O., Englewood, OH  
Michael Francis Coudreaut, M.D., Salt Lake City, UT  
Keith W. Courtney, D.O., Calgary, AB

William Frederick Cox, M.D., Niskayuna, NY  
Laurie Shoffner Coyner, M.D., Wichita, KS  
Shannon Storey Croft, M.D., Atlanta, GA  
Barbara S. Cuddeback, M.D., Maumee, OH  
Deirdre Clare Curran, M.D., Florence, MA  
Shealyn Bauder Cyr, M.D., Austin, TX  
Carlos R. Danger, M.D., Miami, FL  
Bibi Das, M.D., Menlo Park, CA  
Stacy A. Davids, M.D., North Liberty, IA  
Elizabeth Ann Davis, M.D., Brookline, MA  
Jose Maria G. De Asis, M.D., APO, AE  
Teresa Lynne Delawter, M.D., Manassas, VA  
Mary Lou Delduca, M.D., Flagstaff, AZ  
Deborah Anne Dellmore, M.D., Albuquerque, NM  
Kiran Sunil Deoras, M.D. Ph.D., Murrysville, PA  
Dwayne Ryk Depry, D.O., Fresno, CA  
Bipinchandra Manharlal Desai, M.D., Powell, OH  
Rashmi Sameer Deshmukh, M.D., Fremont, CA  
Trent David Desselle, M.D., New Orleans, LA  
Colin Porus Dias, M.D., Los Angeles, CA  
Nancy Diazgranados, M.D., Rockville, MD  
Laura Susan Dibble, M.D., Manlius, NY  
Eileen DiFrancesco, M.D., New York, NY  
Irina Yefimovna Digilova, M.D., Houston, TX  
Barbara DiGiuseppe, M.D., East Patchogue, NY  
Jacinto Antonio V. Dizon, M.D., Chicago, IL  
Mary Iftner Dobbins, M.D., Springfield, IL  
David Lee Dobson Jr., M.D., Richmond Hill, GA  
Alexandre Y Dombrovski, M.D., Pittsburgh, PA  
Valentina Angelova Doumanian, M.D., Cedar Falls, IA  
Joseph Raymond Doumit, M.D., Seattle, WA

Laura Anna Dove, M.D., Longmeadow, MA  
Brian Patrick Dowling, M.D., Cincinnati, OH  
Michael Edward Doyle, M.D., Cornwall On Hudson, NY  
Delverne Arthur Dressel Jr., M.D., Baltimore, MD  
Brittany Nguyen Dudas, M.D., Greenwich, CT  
Sean Reid Duffy, M.D., Las Vegas, NV  
Ovidiu Adrian Dulgheru, M.D., Edinburg, TX  
Jennifer Theresa Dunlap, M.D., New Orleans, LA  
Patrice Marie Duquette, M.D., Huntington Woods, MI  
Catherine Jane Durie, M.D., Easthampton, MA  
Sanjeev Dwivedi, M.D., Oak Brook, IL  
Oleh Dzera, M.D., Noblesville, IN  
David Vincent Eakin II, M.D., Tulsa, OK  
Jessica Agatha Edwards, M.D., Lewisville, NC  
Christopher Ferris Eggleston, M.D., Carmichael, CA  
Yasser El-Said El-Hammamy, M.D., Andover, MN  
Hussein E. El-Khatib, M.D., South Charleston, WV  
Stephen Craig Ellen, M.D., Bedford, MA  
Anthony Reed Ellis, M.D., Flushing, MI  
Claudia Alejandra Epelbaum, M.D., Newton, MA  
Roger John Epstein, M.D., Long Beach, CA  
Kimberly Erway, M.D., Rochester, NY  
Brian K. Esch, M.D., South Bend, IN  
Ricardo Kelly Espailat, M.D., PARKLAND, FL  
Ryan Felipe Estevez, M.D., Ph.D., M.P.H., Tampa, FL  
Stephanie Roxanne Exum, M.D., Cornelius, NC  
Nargis Zafer Fakhri, M.D., Columbus, GA  
Ayman Hafez Fanous, M.D., Centreville, VA  
Tiffany Rose Farchione, M.D., Washington, DC  
Quinne Raielle Farrington, M.D., Williamsport, PA  
D. Todd Feeley, M.D., San Francisco, CA

Michael James Ferlauto, M.D., Columbia, SC  
Jorge Eugene Fernald, M.D., Orland Park, IL  
Jairo Fernandez, M.D., West Palm Beach, FL  
Jess Gerard Fiedorowicz, M.D., Ph.D., Iowa City, IA  
Bernard Aloysius Fischer, M.D., Columbia, MD  
Kathryn Lynn Fischer, M.D., Eden Prairie, MN  
Masaru Jeremy Fisher, M.D., San Francisco, CA  
Avrim Brett Fishkind, M.D., Houston, TX  
Michael William Fitzgerald, M.D., Encinitas, CA  
George Kevin Flood, M.D., Encinitas, CA  
Cesar Dumayas Florita, M.D., Merrick, NY  
Mardjan Foroutan, M.D., SYCAMORE, IL  
Judith Ann Forshee, M.D., Norman, OK  
Alexandra Maria Fotiou, M.D., Rochester, NY  
Michael Kent Frantz, D.O., Pittsburgh, PA  
Carlotta Vanessa Freeman, M.D., Marina Del Rey, CA  
David K. Frey, M.D., Syracuse, NY  
Gary William Frick, M.D., Daytona Beach, FL  
Joseph Irwin Friedman, M.D., Commack, NY  
Michael Alan Friedman, M.D., Sharon, MA  
Leslie Elizabeth Frinks, M.D., Elgin, SC  
Edward Fruitman, M.D., Atlantic Bch, NY  
Melissa Frumin, M.D., West Newton, MA  
Julius Howmin Fu, M.D., Santa Clara, CA  
Mark Dudley Gage, D.O., Tulsa, OK  
Steve Frank Galarza, D.O., Patton, CA  
Anthony Louis Gallo Jr., M.D., East Greenwich, RI  
Neeraj Gandotra, M.D., Silver Spring, MD  
Darren Paul Gannuch, M.D., Huntsville, AL  
Amir Garakani, M.D., Stamford, CT  
Donald Joaquin Garcia Jr., M.D., Austin, TX

Javier Garcia, M.D., Staten Island, NY  
Paul Garcia, M.D., Bath, NC  
Mary Helen Garcia-Holguin, M.D., San Antonio, TX  
Pamela Zalewski Georgevich, M.D., Hermitage, PA  
Henry David Gerson, M.D., Ithaca, NY  
Daniel A. Giacomo, M.D., Evanston, IL  
Carol Minnette Gibbs, M.D., Cary, NC  
Patricia Duggar Gibson, M.D., Little Rock, AR  
Jean Annette Gilstrap, M.D., Colorado Springs, CO  
Kumudini H. Ginde, M.D., West Dundee, IL  
Velda Jean Givens, D.O., Palmetto, GA  
Natalie Alexandra Gluck, M.D., New York, NY  
Liviu Constantin Goia, M.D., Warm Springs, MT  
Marina Goldman, M.D., Jenkintown, PA  
Toby Doris Goldsmith, M.D., Atl, GA  
Juan Carlos Gonzalez, M.D., Austin, TX  
Susan Gloria Goodson, M.D., Hamden, CT  
Bradley Jennings Gordon, M.D., Highland Park, IL  
Jennifer Gwyneth Gotto, M.D., Boise, ID  
Nicola Susan Gray, M.D., Mechanicsburg, PA  
Judy Andrea Greene, M.D., New York, NY  
Leslie Greenspan, M.D., Madison, WI  
Ann Montanaro Groover, M.D., Calhoun, GA  
Michael Frederic Grunebaum, M.D., New York, NY  
Gina Maria Guadagno, M.D., West Chester, OH  
Veronica Manaos Gubatan, M.D., Maryville, TN  
Jon Alvin Guidry, M.D., Tyler, TX  
Hossam H. Guirgis, M.D., Columbus, OH  
Michele Margaret Gunning, M.D., Mont Vernon, NH  
Adarsh K. Gupta, M.D., Great Neck, NY  
Shyam Kelly Gupta, M.D., Kirkland, WA

Silvia Hafliker, M.D., Houston, TX  
Terry M. Hagan, M.D., Louisville, KY  
Zhila Haghbin, M.D., El Dorado Hills, CA  
Clayton Scott Hall, D.O., Lexington, KY  
M. Ahmad Hameed, M.D., Hummelstown, PA  
Douglas Eugene Hanlin, M.D., San Francisco, CA  
Jennifer Ahn Hanner, M.D., New York, NY  
Daria Marie Hanson, M.D., Centerville, MA  
Masroor Ul Haq, M.D., West Bloomfield, MI  
Mohammed Sabahath Ali Haqqani, M.D., Rancho Cucamonga, CA  
Anuradha D. Hardas, M.D., Wallingford, PA  
Kelli Jane Kerr Harding, M.D., New York, NY  
Colin James Harrington, M.D., Providence, RI  
Herbert William Harris, M.D., Ph.D., Chapel Hill, NC  
Veronica Harsh, M.D., Charlottesville, VA  
David Arthur Hart, M.D., Corvallis, OR  
Julie Ann Hartley, M.D., Sylvania, OH  
David Shawn Harvey, M.D., Birmingham, AL  
Sharon Motzkin Hasbani, M.D., New Haven, CT  
Despina Hatziergati, M.D., White Plains, NY  
Marshall Tobey Hayes, D.O., Viera, FL  
Eric Phillips Hazen, M.D., Boston, MA  
Jennifer Claire Heath, M.D., Benbrook, TX  
Clemens Heiderhoff, M.D., New York, NY  
David Carlton Henderson, M.D., Bedford, MA  
Ellen Dorothy Herbst, M.D., Mill Valley, CA  
Howard Lawrence Herman, M.D., Chicago, IL  
Michael Anthony Hernandez, M.D., Corpus Christi, TX  
Pamela Jean Hetherington, M.D., Branford, CT  
Dean Anthony Hickman, M.D., Metairie, LA

Steven Mark Hill, M.D., Grand Forks, ND  
Christopher E. Hines, M.D., Augusta, GA  
Steven Michael Hines, M.D., Athens, GA  
April Hirschberg, M.D., Acton, MA  
Lori Denise Holland, D.O., Denver, CO  
Lynna Gaye Hollis, M.D., Mount Juliet, TN  
Cynthia Lee Hope, M.D., Mt Pleasant, SC  
Rebecca Jane Hopkins, M.D., Hillsborough, CA  
Saskia Emma Hostetler Lippy, M.D., Portland, OR  
John Phillip Houston, M.D., Buda, TX  
Lisa Youngling Howard, M.D., Williamstown, MA  
Willis Hadley Hoyt IV, D.O., Springfield, MO  
Ray Chih-Jui Hsiao, M.D., Bellevue, WA  
Rona Jane Hu, M.D., Stanford, CA  
David Leh-Sheng Huang, M.D., Glen Ellen, CA  
Kevin Gochan Huang, M.D., Philadelphia, PA  
Li Jun Huang, M.D., Elmhurst, IL  
Khalid Mahmoud Hubeishy, M.D., Fairport, NY  
Eddie Lee Huggins Jr., M.D., Anniston, AL  
Motria Natalie Huk, M.D., Quincy, MA  
Kimberly Anne Jones Humann, M.D., Hood River, OR  
Scott Alan Humphreys, M.D., Denver, CO  
Damir Huremovic, M.D., MPP, Mineola, NY  
Peyton Hobson Hurt, M.D., Charlottesville, VA  
Doris Monica Iarovici, M.D., Boston, MA  
Hicham Mohsen Ibrahim, M.D., Dallas, TX  
Sunday Timothy C. Ilechukwu, M.D., Northville, MI  
Syed Khalid Imam, M.D., Columbia, MO  
Daniel Ionescu, M.D., Northfield, OH  
Isak Isakov, M.D., Forest Hills, NY  
Waguih William IsHak, M.D., Beverly Hills, CA

Emil Hristov Ivanov, M.D., Pittsburgh, PA  
Christopher George Ivany, M.D., Vienna, VA  
David Allen Iverson, M.D., Denver, CO  
Naureen Jaffri, D.O., Williamsville, NY  
David William Jahn, M.D., Sylvania, OH  
Vidhyalakshmi Venugopal Jaishankar, M.D., Winter Park, FL  
Hameeda Jangda, M.D., Middletown, NY  
Jean Carl Jarda, M.D., Middletown, CT  
Michel Jean-Baptiste, M.D., woodbridge, CT  
Glenn Reginald Jeffery, M.D., New York, NY  
Amy Ward Jelliffe, M.D., Flagstaff, AZ  
Celia Jenkins, M.D., Dallas, TX  
Jeffery Rex Jensen, M.D., Perry Hall, MD  
Erika Jessen, M.D., New Haven, CT  
Noel Brian Jewell, M.D., Caldwell, WV  
John P. John, M.D., Russell, PA  
Sajiv John, M.D., Schererville, IN  
Ronald Joseph Johnson, M.D., Makanda, IL  
Darnita Louise Johnson-LaBorde, M.D., Alpharetta, GA  
Mark Aaron Johnston, M.D., Salt Lake City, UT  
Barclay Norman Jones, M.D., St. Louis Park, MN  
Janelle Renee Jones, M.D., Denver, CO  
Crispin L. Juguilon Jr., M.D., austin, TX  
George Vincent Kalayil, M.D., Louisville, KY  
Charles Firaz Kandalauft, M.D., Hastings on Hudson, NY  
Cecelia Patrice Kane, M.D., Dublin, GA  
Mark Hyun Bai Kang, M.D., Albuquerque, NM  
Bodhi Kikue Kannon, M.D., Hanover, MN  
Marc Israel Kaplan, D.O., Kennebunk, ME  
Lyudmila Karlin, M.D., Merrick, NY

Rakesh Karmacharya, M.D., Ph.D., Lincoln, MA  
Adam Andrew Karwatowicz, M.D., Monterey, CA  
Vikram Kashyap, M.D., SAN ANTONIO, TX  
Courtney Molnar Kassar, M.D., Cincinnati, OH  
Kyle Kato, M.D., New York, NY  
Suneel Babu Katragadda, M.D., Atlanta, GA  
Lawrence Michael Katz, M.D., Newburgh, IN  
Steven Mitchell Katz, M.D., Hartford, CT  
Heather C Kaufman, M.D., New York, NY  
Saurabh Kaushik, M.D., White Plains, NY  
Kari Lehua Kawakami Hancock, M.D., Portland, OR  
Judith Evelyn Kaye, M.D., Pittsburgh, PA  
Denise Cristine Kellaheer, D.O., Folsom, CA  
Gregory Fisher Kellermeyer, M.D., Golden, CO  
Robert Emmett Kelly Jr., M.D., White Plains, NY  
Victoria Calvina Kelly, M.D., Toledo, OH  
David Kelner, M.D., Chicago, IL  
John Charles Kennedy, M.D., Cincinnati, OH  
Adnan Iqbal Khan, M.D., Tuxedo Park, NY  
Ahmad Nawaz Khan, M.D., Berwyn Heights, MD  
Shahzad Ahmed Khan, M.D., San Diego, CA  
Madhurani Khare, M.D., Pennington, NJ  
Gauri Khatkhate, M.D., Lincolnwood, IL  
Gauhar Khurshid, M.D., Exton, PA  
Sunil Dharamdas Khushalani, M.D., Cockeysville, MD  
Carla Ann Kilgore, M.D., Carmel, IN  
Susan Diaz Killenberg, M.D., Adamsville, RI  
Amy Kim, M.D., Voorhees, NJ  
Eunha Kim, M.D., Lansdale, PA  
Raymond Michael Kimball, M.D., Anderson, SC  
Florence Vidzem Kimbo, M.D., Strongsville, OH  
Cynthia Y. King, M.D., Albuquerque, NM  
Lindsay Kiriakos, M.D., Los Angeles, CA  
Asad Kirmani, M.D., Austin, TX  
Joel Irwin Kirson, M.D., Big Canoe, GA  
Todd Michael Kline, M.D., Denver, CO  
Elizabeth Ann Kohlhepp, M.D., Scottsdale, AZ  
Manasi V. Kolpe, M.D., Simi Valley, CA  
Grace N. Kooper, M.D., Cumberland, RI  
Christopher A. Kovell, D.O., Columbus, OH  
Michael Frederick Kozart, M.D., Ph.D, Sebastopol, CA  
Susan Thomas Kozel, M.D., Arlington, VA  
Alissa Jo Kraisosky, M.D., Santa Fe, NM  
Felix Erich Kral, M.D., Eatontown, NJ  
David Evan Krantz, M.D., Los Angeles, CA  
David Kreditor, M.D., New York, NY  
Mary Lynn Finnell Krolik, M.D., Surprise, AZ  
John Samuel Kruse, M.D., Ph.D., San Francisco, CA  
Akira Kugaya, M.D., Rancho Palos Verdes, CA  
Alyson Renee Kuroski-Mazzei, D.O., Charlotte, NC  
Joseph Leonard Kut, M.D., Lake Forest, IL  
John Michael Kuzma, M.D., Stillwater, MN  
Carisa Maureen Kymissis, M.D., New York, NY  
Timothy Jerome Lacy, M.D., Silver Spring, MD  
Isabel Teresa Lagomasino, M.D., M.S.H.S., Santa Monica, CA  
Mona Lal, M.D., Oakbrook, IL  
Matthew Charles Lally, M.D., Sharon, MA  
William D. Lambert, M.D., Greenwood, SC  
Jeffrey Michael Lammers, M.D., Grand Junction, CO  
Kayln Tiffany Lane, M.D., Donalsonville, GA  
Daniel Dmitry Langleben, M.D., Philadelphia, PA

|                                                          |                                                |
|----------------------------------------------------------|------------------------------------------------|
| Mario Roberto Lanni, M.D., Fort Gratiot, MI              | Christopher Eugene Lord, M.D., Charlotte, NC   |
| Charles Lapo, M.D., Petoskey, MI                         | Sandra Monica Lowe, M.D., New York, NY         |
| Schoener Michele LaPrairie, M.D., Mandeville, LA         | Patricia Ann Lowrimore, M.D., Park City, UT    |
| Xavier David Lara, M.D., FAPA, Clovis, CA                | Adam Frederick Lowy, M.D., Washington, DC      |
| Joseph A. Lasek, M.D., Burlington, VT                    | Murni Lubis, M.D., Northridge, CA              |
| Eleanor Lavretsky, M.D., Beverly Hills, CA               | Jenna Luu, M.D., Manhattan Beach, CA           |
| Harriet Joan Heidi Lee, M.D., New Orleans, LA            | Eric F. Lydon, M.D., Louisville, KY            |
| Maurice P Lee, M.D., Ph.D., Avon, CT                     | Mariana Nagy Mack, M.D., Overland Park, KS     |
| Sue Y. Lee, M.D., San Rafael, CA                         | Jill Helaine Maddox, M.D., Brooklyn, NY        |
| Cecilia Hippolite Leonard, M.D., DPO, AE                 | Michelle Magid, M.D., Austin, TX               |
| Diego Fabian Lerner, M.D., Redondo Beach, CA             | Sheku Sheaka Magona, M.D., New York, NY        |
| Alla Lerner-Brandon, M.D., Glen Allen, VA                | Sarita Anil Mahajan, M.D., Beaver Creek, OH    |
| Marissa Cummings Leslie, M.D., Philadelphia, PA          | Michael Makhinson, M.D., Ph.D., Torrance, CA   |
| Bruce Daniel Leuchter, M.D., Scarsdale, NY               | Stephen Aaron Malach, M.D., White Plains, NY   |
| Ilan Simha Levinson, M.D., Stroudsburg, PA               | Anil Kumar Malhotra, M.D., Glen Oaks, NY       |
| Brian Thomas Lewis, M.D., Huntersville, NC               | Abid Malik, M.D., Lake Mary, FL                |
| Maxim Lianski, M.D., Brookline, MA                       | Asif Malik, M.D., Spokane, WA                  |
| Michael Ian Liebowitz, M.D., Cotuit, MA                  | Fawad Malik, M.D., San Jose, CA                |
| John Lim, M.D., Oak Park, IL                             | Zaid Bin Hussain Malik, M.D., SPRING, TX       |
| Sabina Lim, M.P.H., M.D., New York, NY                   | Daniel Tonye Mamah, M.D., Saint Louis, MO      |
| Wilbur George Lineback Jr., M.D., Midland, TX            | Sudha Manjunath, M.D., Fremont, CA             |
| Dmitry Vito Listengarten, M.D., San Antonio, TX          | Haritha Maramreddy, M.D., Coppell, TX          |
| Marc Shawn Litle, M.D., Dallas, TX                       | Eve Rose Maremont, M.D., San Francisco, CA     |
| Patrice Diane Lockhart, M.D., Gorham, ME                 | Marylann Markarian, M.D., New Paltz, NY        |
| Falk Wilhelm Lohoff, M.D., Washington, DC                | Courtney A Markham-Abedi, M.D., Lexington, KY  |
| Jane Ellen Loitman, M.D., Saint Louis, MO                | Joseph David Markowitz, M.D., Tampa, FL        |
| Adair Kendrick Look, M.D., Sebastopol, CA                | Peter Kelsey Marlin, M.D., APO AE, AE          |
| Tracy Shawn Loper, M.D., Tulsa, OK                       | Nancy Sharon Martin, M.D., Jackson, MS         |
| William Manuel Lopez, MD, CPE, Arden, NC                 | Emanuel L. Martinez, M.D., Saint Augustine, FL |
| Argelio Luis Lopez-Roca Fernandez, M.D., San Antonio, TX | Tonya Theresa Masino, M.D., San Diego, CA      |
|                                                          | Virginia Grace Matheson, M.D., Dayton, OH      |

Mathew Bijoy Mathew, M.D., Sudbury, MA  
George Mathews Mathews, M.D., Brentwood, TN  
Joseph Mark Mavica, D.O., Boca Raton, FL  
Anthony McCann, M.D., Portland, ME  
Jill Dinwiddie McCarley, M.D., Unicoi, TN  
Craig Michael McCarthy, M.D., Waverly Township, PA  
Nancy Ann McCarthy, M.D., Long Beach, CA  
Robert Kevin McClure, M.D., Chapel Hill, NC  
Megan Elise McClymonds, M.D., Milwaukee, WI  
Kristine Hsu McDaniel, M.D., Atlanta, GA  
Alexander Joseph McDonald IV, M.D., Columbia, SC  
John M. McDonald, M.D., Baltimore, MD  
Barbara McGee, M.D., Clovis, CA  
Jeffrey Louis McGilbra, M.D., Philadelphia, MS  
Janet Patricia McGivern, M.D., Omaha, NE  
Theresa Marie McKay, M.D., Canyon Lake, TX  
Robert Neil McLay, M.D., Ph.D., Chula Vista, CA  
James Edward McLean, M.D., Forest Hills, NY  
Elizabeth Kathleen McMasters, M.D., mchenry, IL  
Joseph Patrick McNally, M.D., Algonquin, IL  
Jill Patricia McNaul, M.D., Boulder, CO  
Debra Valori McQuade, M.D., Salt Lake Cuty, UT  
Ronald Francis Means, M.D., Baltimore, MD  
Akhil Mehra, M.D., San Francisco, CA  
Vishaal Mehra, M.D., San Diego, CA  
Nick C Mellos, M.D., San Diego, CA  
Ilan Melnick, M.D., Coral Gables, FL  
Bengi Biber Melton, M.D., Houston, TX  
Faiza B. Memon, M.D., Brentwood, TN  
Brent Menninger, M.D., Overland Park, KS  
Shelly Menolascino-Belgin, M.D., New York, NY

Jeffrey Scot Meyer, M.D., Fayetteville, NC  
Jeffrey David Meyerhoff, M.D., Portland, OR  
Mikhail Meyerovich, M.D., Goleta, CA  
Anne Fatima Mian, M.D., Longwood, FL  
Mark David Miceli, M.D., New York, NY  
Andrew James Middleditch, M.D., San Francisco, CA  
Snezana Milanovic, M.D., Cambridge, MA  
Jeffrey Morris Miller, M.D., New York, NY  
Karen Elisa Miller, M.D., Ithaca, NY  
Lisa Anne Miller, M.D., Houston, TX  
Shannon C. Miller, M.D., Montgomery, OH  
Venera Rubinovna Miller, M.D., Huntingtown, MD  
Darlene Wolf Millman, M.D., Brookline, MA  
Matthew Richard Mills, M.D., Chicago, IL  
Anjum Mobin, M.D., Windermere, FL  
Stephen Andrew Moe, M.D., Denver, CO  
Faheem Nawaz Moghal, M.D., Washington, DC  
Shane Victor Moio, M.D., Greenfield, WI  
Daniel S. Mollod, M.D., Brookline, MA  
Rajinder Singh Momi, M.D., Peterborough, ON  
Daniel Alexander Monti, M.D., Philadelphia, PA  
Edward Michael Moore, M.D., Voorhees, NJ  
Meredith Leigh Moroff, M.D., Lake Ronkonkoma, NY  
Mary Koshey Morreale, M.D., Birmingham, MI  
Andrew Bevan Morris, M.D., Newfields, NH  
Sudhakar Reddy Morthala, M.D., Columbia, SC  
Emad Mounir Hakim Mounir, M.D., Basking Ridge, NJ  
Karen Melissa Moyer, D.O., Brookline, NH  
John Kurtis Mueller, M.D., Flagstaff, AZ  
Jawed Mehdi Muhammad Bharwani, M.D., Omaha, NE  
Leonard William Mulbry Jr., M.D., Charleston, SC



Caroline Elizabeth Mulder, M.D., Kentfield, CA  
Syed-Shahid Mumtaz, M.D., Chesterfield, MO  
Daniel Sherwood Mundy, M.D., Montclair, NJ  
Farah Munir, D.O., Cleveland Heights, OH  
Frank Javier Munoz, M.D., Hershey, PA  
Adele Tabo Munsayac, M.D., Yonkers, NY  
Elizabeth Baytion Munshi, M.D., Phoenix, AZ  
Holly Beth Mutton, D.O., East Amherst, NY  
Christopher Robert Myers, M.D., Wilmington, NC  
Inessa Valery Mysak, D.O., New Hyde Park, NY  
Geeta Nangia, M.D., Simpsonville, SC  
Lia Nardone, M.D., Gulfport, FL  
Christine Stephanie Naungayan, M.D., Teaneck, NJ  
J. Richard Navarre II, M.D., Nashville, TN  
Sara A. Nawaz, M.D., Cincinnati, OH  
Chandan Nayak, M.D., Oakbrook Terrace, IL  
Stacey Thompson Neal, M.D., Laurel, MD  
Joshua Dayalan Nelson, M.D., Riverside, CA  
Judith Aviva Neugroschl, M.D., New York, NY  
Andrew Richard Newberg, M.D., Durham, NC  
Van Huy Nguyen, M.D., Fredericksburg, VA  
Michelle Jeannette Nichols, M.D., Dallas, TX  
Sara Heather Niego, M.D., Fairfield, CT  
Jessica Rae Nittler, M.D., Harrisburg, MO  
Peggy Colleen Nopoulos, M.D., Iowa City, IA  
Faina Jane Novosolov, M.D., San Francisco, CA  
Jessica Solanda Nowillo, D.O., Waccabuc, NY  
Lynne Jennifer Nugent, M.D., Ambler, PA  
Yanira Maria Olaya, M.D., La Jolla, CA  
David Milton Oliver, M.D., San Diego, CA  
Andrew Lane Olnes, M.D., Anchorage, AK

Mark Warren Olsen, M.D., Rochester, MN  
Jelil Omotayo Onanuga, M.D., Southlake, TX  
John C. Onate Jr., M.D., Sacramento, CA  
Adam John Opbroek, M.D., Spearfish, SD  
Dennis Michael Ordas, M.D., Carlsbad, CA  
Alex Craig Orten, M.D., Anchorage, AK  
Ossama M. Tawakol Osman, M.D., Alain-Uae, AD  
Dion L. Owens, M.D., Tulsa, OK  
Mark Frederick Owens, M.D., San Antonio, TX  
Omobolaji Oluseyi Tolulope Oyebanjo Popoola, , Villa Rica, GA  
Ashok Parameswaran, M.D., San Diego, CA  
Karen M. Parisien, M.D., Grosse Pointe Woods, MI  
Hyung Uk Park, M.D., Shoreline, WA  
Lois Mary Parkison, M.D., San Francisco, CA  
Taft Parsons III, M.D., Birmingham, MI  
Shahzad Asgharali Parvaz, M.D., Terre Haute, IN  
Rakeshkumar Bhagwandas Patel, M.D., Elizabethton, TN  
Sameer Ravindra Patel, M.D., Elkridge, MD  
Farah Naz Pathan, M.D., PLEASANTON, CA  
Brandi Bonner-Cooke Patton, M.D., Hoover, AL  
Frank Donald Pechal, M.D., West Columbia, SC  
Jason Alexander Peck, M.D., Fort Mill, SC  
Vijaya Peddu, M.D., East Brunswick, NJ  
Tracy Joline Peng, M.D., San Francisco, CA  
Lisa S. Perdue, M.D., Cedar Hill, TX  
Christopher Theodore Perry, M.D., APO, AND  
L. Russell Pet, M.D., Barrington, RI  
Juliette Petersen, M.D., Minnetonka, MN  
Karla Melissa Petersen, M.D., San Francisco, CA  
Christopher Britt Peterson, M.D., Arden, NC

Kris Allen Peterson, M.D., Steilacoom, WA  
 Marija Petrovic, M.D., Alexandria, VA  
 Geoffrey Bryant Phillips, M.D., Tustin, CA  
 Omolara L. Phillips, M.D., Parkland, FL  
 Rebecca Suzanne Phillips, M.D., Tonawanda, NY  
 Ethan C. T. Pien, M.D., HONOLULU, HI  
 Andrew Allen Pieper, M.D., Ph.D., Cleveland, OH  
 Michelle Pietryga, M.D., Sherman Oaks, CA  
 Sandrine Pirard, M.D., Ph.D., M.P.H., Longmeadow, MA  
 Prabhakar Pisipati, M.D., Portage, MI  
 Caroline Hustead Poblete, M.D., Baltimore, MD  
 Gregory Michael Pontone, M.D., Timonium, MD  
 Douglas Richard Porter, M.D., New Orleans, LA  
 Claire Louise Pouncey, M.D., Ph.D., Philadelphia, PA  
 Carol Kosmicke Powell, M.D., Stoddard, WI  
 Konasale Muni Rajendra Prasad, M.D., Warrendale, PA  
 Ervin Delmar Prewette II, M.D., Greer, SC  
 Aneta Lotakov Prince, M.D., Tarzana, CA  
 Jefferson Bruce Prince, M.D., S Hamilton, MA  
 David Joel Printz, M.D., San Diego, CA  
 John William Pruett, M.D., Reno, NV  
 Surender Pal Singh Punia, M.D., Danville, CA  
 Aliza Rabin, M.D., New York, NY  
 Michael John Rack, M.D., Memphis, TN  
 Michael Patrick Rafferty, M.D., Dallas, TX  
 Neala Rafizadeh, M.D., Brooklyn, NY  
 Mizanur Rahman, M.D., Fayetteville, NC  
 Mohammed Omar Rahman, M.D., Weston, MA  
 Geetha Ramachandran, M.D., Chappaqua, NY  
 Mohamed Ibrahim Ramadan, M.D., Bullhead City, AZ  
 Lopa Ketan Rana, M.D., Troy, MI  
 Peter A. Rao, M.D., Tulsa, OK  
 Carl George Rasmusen, M.D., St George, UT  
 Ann Margaret Rasmusson, M.D., Boston, MA  
 Keykhosrow Rastegari, M.D., Lancaster, CA  
 Robert Thomas Raster, M.D., South Bend, IN  
 Devnandini Rastogi, M.D., Scottsdale, AZ  
 Edward Ratush, M.D., Jersey City, NJ  
 Jillian Michelle Rauh, M.D., Newtown, PA  
 Tara Faun Ray, D.O., Hurricane, WV  
 Nasreen Razack-Malik, M.D., Orlando, FL  
 Catherine Ann Reed, M.D., Palo Alto, CA  
 Daryn Reicherter, M.D., Half Moon Bay, CA  
 Aaron S Reichlin, M.D., Evanston, IL  
 R. Jo Renn, M.D., Ph.D., Olympia, WA  
 Cynthia Isabel Resendez, M.D., Oakland, CA  
 Deborah Anne Reynolds, M.D., Arvada, CO  
 Jennifer Lizarraga Richards, M.D., Bellevue, WA  
 Denae Waugh Rickenbacker, M.D., Cedar Park, TX  
 Kathy Rivera, M.D., Cincinnati, OH  
 Gina Rivera-Miya, M.D., San Diego, CA  
 Luis Rives, M.D., Naples, FL  
 Saba Fatima Rizvi, M.D., granite bay, CA  
 Mary Walsh Roberts, M.D., Detroit, MI  
 Steve A. Roche, M.D., Dallas, TX  
 Lori Jo Rogers, M.D., West Lafayette, IN  
 Matthew Frederick Romanelli, M.D., Brooklyn, NY  
 Lisa A. Rone, M.D., Chicago, IL  
 Daniel D. Rosen, M.D., New York, NY  
 Todd Neal Rosen, M.D., Bloomfield Hills, MI  
 Nils Adam Rosenbaum, M.D., Albuquerque, NM  
 Adam Rosenblatt, M.D., Mechanicsville, VA

Jason Bruce Rosenstock, M.D., Pittsburgh, PA

Kim Sylvia Rosenthal, M.D., Arden, NC

Lesley Suzanne Ross, M.D., San Diego, CA

Dikea Roussos-Ross, M.D., Gainesville, FL

Patricia Lynn Roy, M.D., VERNON HILLS, IL

Amal Salim Rubai, M.D., University Heights, OH

Carlos Alberto Rueda, M.D., Yonkers, NY

Rafael Ruiz, M.D., Lubbock, TX

Laura Ann Ruoff, M.D., Bristol, RI

William G. Rush, M.D., Brooklyn, NY

Bret R Rutherford, M.D., Scarsdale, NY

Michael Craig Saathoff, M.D., Pueblo, CO

Irfan Saeed, M.D., Vienna, VA

Kemal Sagduyu, M.D., Overland Park, KS

Alcira Revelo Sahami, M.D., Bakersfield, CA

Richard Saini, M.D., Carmel, IN

Stephen Gregory Salzbrenner, M.D., Omaha, NE

Margaret Milad Samaan, M.D., Troy, MI

Alice Angela Sanchez, M.D., Frisco, TX

Diana Marcela Sanchez-Steiner, M.D., Weston, FL

Michael David Sands, M.D., Oakland, CA

Carlos A. Santana, M.D., Tampa, FL

Margaret Mary Saracino, M.D., Duluth, MN

Wilbur A. Sarino, M.D., Menasha, WI

Ann Kathryn Sarpy, M.D., Oak Park, IL

Deepika Sastry, M.D., Lakewood, OH

Nirmal Sathaye, M.D., Warren, NJ

Ramotse Donald G. Saunders, M.D., San Francisco, CA

Sanjaya Saxena, M.D., La Jolla, CA

David William Schab, M.D., M.P.H., New York, NY

Frauke Christiane Schaefer, M.D., Durham, NC

David Eugene Schaeffer, D.O., Carefree, AZ

Harriet Scheft, M.D., Newton, MA

Corbett Schimming, M.D., Garrison, NY

Martin David Schlakman, M.D., Metuchen, NJ

Debbie Gail Schnapper, M.D., New York, NY

Frank Vernon Schraml, M.D., Phoenix, AZ

Isabel Nieves Schuermeyer, M.D., Richmond Heights, OH

Chad William Schultheis, M.D., Bloomington, IN

Joseph M. Schwartz, M.D., Baltimore, MD

Nadine Schwartz, M.D., Upper Arlington, OH

Angela Scicutella, M.D. Ph.D., Douglaston, NY

Rachelle F. Scott, M.D., Baldwin, NY

Robert Christopher Searles, M.D., San Diego, CA

Douglas Sears, M.D., Oak Park, CA

Andrea L. Seek, M.D., Burlington, MA

Janet Seligson-Dowie, M.D., New Orleans, LA

Eric Semeko, M.D., Charlotte, NC

Michael Joseph Sernyak Jr., M.D., Branford, CT

Yana Serobyanyan, D.O., Brooklyn, NY

Kimberly Ann Serravezza, M.D., Decatur, GA

Jennifer Elizabeth Service, M.D., Edina, MN

Robert John Sevenich, M.D., North Oaks, MN

Rahim Shafa, M.D., Lexington, MA

Deval Ajit Shah, M.D., Menlo Park, CA

Dhwani Shah, M.D., Princeton, NJ

Muhammad Asghar Ali Shah, M.D., Orange Park, FL

Rakesh J Shah, M.D., Machesney Park, IL

Cynthia Lee Shahan, M.D., Charlotte, NC

Howard Irwin Shapiro, M.D., Ann Arbor, MI

Anil Sharma, M.D., Los Angeles, CA

Samuel L. Sharmat, M.D., New York, NY

Jennifer Lynn Shashek, M.D., St. Charles, MO  
Rita Ann Shaughnessy, M.D., Philadelphia, PA  
Jonathan Edward Sherin, M.D., Ph.D., Marina Del Rey, CA  
Rupa Ravindra Shetty, M.D., Myrtle Beach, SC  
Kendra Kae-Wen Shih, M.D., ANN ARBOR, MI  
Akbar Khan Shinwari, M.D., MASON, OH  
Gowramma Shivashankar, M.D., Lafayette, NJ  
Edward Baron Short, M.D., Charleston, SC  
Ujwal Reddy Siddamreddy, MBBS, Ooltewah, TN  
Anila Ahsan Siddiqi, M.D., New Hyde Park, NY  
Zakaria Siddiqui, M.D., elkhorn, NE  
Rebecca Leader Siegel, M.D., New York, NY  
Suzana Simkovic, M.D., Danville, CA  
Cassandra Goins Simms, M.D., Ooltewah, TN  
Naomi Michele Simon, M.D., New York, NY  
Maria Lucila Sison-Llanes, M.D., Pasadena, CA  
Kelly Hartline Skelton, M.D., Ph.D., Decatur, GA  
Leif Eric Skille, M.D., Napa, CA  
Jeffrey Justin Smarrella, M.D., Verona, WI  
Olga Marcus Smetkov, M.D., Sharon, MA  
Christian Jerril Smith, M.D., Apo, AE  
Christina Clem Smith, M.D., Vestavia, AL  
Delaney McGinnis Smith, M.D., Columbus, OH  
Douglas Graham Smith, M.D., Rockwell, NC  
Ryan C. Smith, M.D., Corpus Christi, TX  
Sally Wilson Smith, M.D., Charleston, SC  
Jordan Wassertheil Smoller, M.D., Boston, MA  
Kevin Kragh Snyder, M.D., Colorado Springs, CO  
William David Sobel, M.D., New York, NY  
Robert Anthony Sobut, M.D., Chicago, IL

Louis William Solomon, M.D., Gainesville, FL  
Nathan P. Somers, M.D., West Springfield, MA  
Steven Francis Sonnek, M.D., Victoria, MN  
Raul Soto-Acosta, M.D., Jacksonville, FL  
Nickie Melinda Spears, M.D., Charlottesville, VA  
Marie Ann Sprague, D.O., Jacksonville, NC  
Kimberly Frances Stalford, M.D., Arden, NC  
Sharon Stanford, M.D., Cincinnati, OH  
Aimee Lynne Stanislawski, M.D., East Amherst, NY  
Michael Vladimir Stefanovich, M.D., Fort Lee, NJ  
Gary Samuel Stein, M.D., West Hartford, CT  
Sara L. Stein, M.D., Pepper Pike, OH  
Laura Frances Steinberg, M.D., Shaker Heights, OH  
Brent Edward Stevenson, D.O., FAIRVIEW, TX  
Timothy Ellis Stone, M.D., Mountain Brook, AL  
Ronald Rae Lanaria Suarez, M.D., San Jose, CA  
Steven Mitchell Sugg, M.D., Hoover, AL  
Maria Ann Sullivan, M.D., Ph.D., Winchester, MA  
Syeda Nilufar Sultana, M.D., Orlando, FL  
Rita Suri, M.D., Palos Verdes Estates, CA  
Michael Vittorio Susano, M.D., Shreveport, LA  
Steven John Sutherland, M.D., Duluth, MN  
Joji Suzuki, M.D., Boston, MA  
Peter Tor Swanljung, M.D., Rydal, PA  
Karen Lee Swartz, M.D., Baltimore, MD  
Tommy Swiney, D.O., Tallahassee, FL  
Murtaza Hamid Syed, M.D., WINDERMERE, FL  
Zsuzsa Szombathyne Meszaros, M.D., Ph.D., Jamesville, NY  
Wojciech Szulaczkowski, M.D., Basking Ridge, NJ  
Anoshiravan Taheri-Tafreshi, M.D., Woodland Hills, CA

Michael Masayuki Takamura, M.D., Poway, CA  
Rebecca L Tamas, M.D., Louisville, KY  
Gregory Zvi Tau, M.D., Ph.D., Maplewood, NJ  
Leslie van Houten Taylor, M.D., Madison, WI  
Phyliss Nicole Taylor, M.D., Jacksonville, FL  
Tahir Tellioglu, M.D., Warwick, RI  
Andrea Temerova, M.D., Los Angeles, CA  
Artin Terhakopian, M.D., Colorado Springs, CO  
Jane Theobald, M.D., LaVista, NE  
Stephen Michael Thielke, M.D., Seattle, WA  
William Scott Thomas, M.D., Keyser, WV  
Christopher M. Tidd, M.D., Pittsford, NY  
Paul Tiger, M.D., Prescott, AZ  
Elbert Stinson Tillerson Jr., M.D., Columbia, MO  
Erwin Cham Ting, M.D., New York, NY  
Abdi Yusufali Tinwalla, M.D., Burr Ridge, IL  
Robert Keith Tittmann, M.D., Belmont, MA  
Robin D. W. Toler, M.D., Columbia, MD  
Tracy Ann Tomac, M.D., West Saint Paul, MN  
Paul Jiri Topol, M.D., Juneau, AK  
Claudio O. Toppelberg, M.D., Chestnut Hill, MA  
Christina Annette Treece, M.D., Houston, TX  
Jodie Kathlene Trello-Rishel, M.D., eules, TX  
Robert Michael Trimmer, M.D., Sacramento, CA  
Svetlana Troitskaia Williams, M.D., Belvedere Tiburon, CA  
William Thomas Trost, M.D., Danville, VA  
Jenny Jien-I Tsai, M.D., Portland, OR  
Michael Ira Turk, M.D., State College, PA  
Vesela Tzvetanova Tzoneva-Kamberova, M.D., Shreveport, LA  
Tanya Underwood, D.O., Tucson, AZ

Randal Floyd Unsell, M.D., Sherman, TX  
Sudha Uppuluri, M.D., Danville, IL  
Varsha Vaidya Kunnirickal, M.D., SILVER SPRING, MD  
Mark Vakkur, M.D., Decatur, GA  
Madeleine Mendoza Valencerina, M.D., Cerritos, CA  
Sailaja Devi Valiveti, M.D., Paramus, NJ  
Rajasekhar Kishore Valmiki, M.D., Jacksonville, FL  
Yana Michelle Van Arsdale, M.D., Ph.D., Santa Barbara, CA  
Laura Margaret Van Cleve, D.O., Minneapolis, MN  
Scott Patrick Van Sant, M.D., Milledgeville, GA  
Kaycia Lynne Vansickle, M.D., Knoxville, TN  
Francisco Praveen Varicat, D.O., Minneapolis, MN  
Sujit Ram Varma, M.D., F.A.P.A., Edina, MN  
Vahag Vartanian, M.D., Racine, WI  
Tarak Vasavada, M.D., Huntsville, AL  
Anika D. Vaughn-Cooke, M.D., Philadelphia, PA  
Eileen Fitzgerald Venable, M.D., Tallahassee, FL  
Athi P. Venkatesh, M.D., The Woodlands, TX  
Fidel Alegre Ventura Jr., M.D., Saint Petersburg, FL  
Maria Cecilia Vicente Prado, M.D., San Juan, PR  
Gordana Dragan Vitaliano, M.D., Boston, MA  
Stephen Frederick Vobach, M.D., Dallas, TX  
Evan Lars Vogel, M.D., Easley, SC  
Mary Ellen Louise Vomacka, M.D., Kandiyohi, MN  
Michael Wayne Wachter, M.D., San Francisco, CA  
Linda Michelle Waldman, M.D., Farmington Hills, MI  
David Melvin Walker, M.D., Madison, MS  
Susan Jervey Waller, M.D., Powhatan, VA  
Richard Lee Wallingford, M.D., Montrose, CO  
Lorene Louise Walter, M.D., Cincinnati, OH

Michele Ingre Walters, M.D., Philadelphia, PA  
Nader Fathi Wassef, M.D., Napa, CA  
Lateefah Kibibi Asybi Watford-Goines, M.D.,  
Lawrenceville, GA  
Andrea Joy Waxman, M.D., Phoenix, AZ  
Mary Melinda Weakley, M.D., Bloomington, IN  
Mary Carol Weber, M.D., Indianapolis, IN  
Michelle Therese Weckmann, M.D., Iowa City, IA  
Elizabeth R Weil, M.D., Albuquerque, NM  
Elisabeth Weinstein, M.D., Ann Arbor, MI  
Daniel Weintraub, M.D., Ardmore, PA  
Jenny Rebecca Weis, M.D., New York, NY  
David Brian Weiss, M.D., Englewood, CO  
Kristen Underhill Welch, M.D., Chicago, IL  
Samuel George Welch, M.D., Winchester, KY  
Meera Wells, M.D., Easton, MD  
Suzanne Lori Wertheimer, M.D., Bourne, MA  
DeLynn Michelle Williams, M.D., Indianapolis, IN  
Kira Ann Williams, M.D., Redondo Beach, CA  
Michelle Nicole Williams, M.D., Pearland, TX  
Pamela Y. Williams, M.D., Union, NJ  
Amanda Grace Wilson, M.D., Nashville, TN  
Jennifer M. Wilson, M.D., Carmel, IN  
Anna M Wiltse, M.D., Vacaville, CA  
Thomas Craig Winegarden, M.D., Eden Prairie, MN  
Brian Keith Wise, M.D., Denver, CO  
Lawrence Sagin Wissow, M.D., Baltimore, MD  
Amelia Margaret Withington, M.D., Wynnewood, PA  
Janet Melissa Witte, M.D., M.P.H., Roslindale, MA  
Teri Lyn Wolf, M.D., Ann Arbor, MI  
David John Wolfe, M.D., Waban, MA

Matthew Lot Kai Wong, M.D., South Pasadena, CA  
Sherri L. Wongchaowart, M.D., Dublin, OH  
Lynn Purcell Wright, M.D., Simpsonville, SC  
Michael Chihkang Wu, M.D., Brea, CA  
Jay Lin Wung, M.D., SALEM, OR  
Mary Lynn Wyant, M.D., Grapevine, TX  
Thomas Clayton Wyatt, M.D., Chatsworth, GA  
Rebecca Lynn Wysoske, M.D., Council Bluffs, IA  
Sofia Shirin Yahya, M.D., Ormond Beach, FL  
Vinita Yalamanchili, M.D., Vestavia, AL  
Helen Fleur Yeni-Komshian, M.D., Palo Alto, CA  
Jay Anthony Yeomans, M.D., Charlotte, NC  
Yelena M. Yermak, M.D., Carmel, NY  
Cindy Yeung, D.O., Princeton, NJ  
Beverly Kay Young, M.D., Eagle Point, OR  
John Quincy Young, M.D., Mamaroneck, NY  
Hong Yu, M.D., Williamsville, NY  
Sun Young Yum, M.D., Seoul, n/a  
Shadi Zaghoul, M.D., Westfield, MA  
Nadia Javaid Zakriya, M.D., Clarksville, MD  
Alysa Dawn Zalma, M.D., Lake Oswego, OR  
Xiaoyan Zhang, M.D., Beachwood, OH  
Michael Steven Ziffra, M.D., Chicago, IL  
Louis Matthew Zoko, M.D., Palos Park, IL  
Patricia Jaye Zurflieh, M.D., Seminole, FL
